# Supplementary material for: Archaeological Bolivian maize genomes suggest diversity is associated with Inca cultural expansion and environmental variation in South America
Source: Research Square preprint supplement (doi:10.21203/rs.3.rs-2592230/v1), 2023-03-03
Supplement: Supplementary file 1 [file 30354b0fcd5da9b3eae2d316.xlsx]

## Sheet: Supplementary Data Set 2
Supplementary DataSet 2. Genelist of BM_vs_ancientHonduras and BM_vs_ancientChile under P<=0.000001.
P<0.000001
BM_vs_ancientHonduras									BM_vs_ancientChile										Abbreviation	Name
K10	K50	K100	K150	K200	K300	K400	K500		K10	K50	K100	K150	K200	K300	K400	K500			BP	Biological Process
Zm00001eb272800	Zm00001eb240590	Zm00001eb027140	Zm00001eb027140	Zm00001eb240520	Zm00001eb240520	Zm00001eb240520	Zm00001eb240520		Zm00001eb272810	Zm00001eb129860	Zm00001eb027140	Zm00001eb027140	Zm00001eb240520	Zm00001eb150800	Zm00001eb097410	Zm00001eb097410			CC	Cellular Componen
Zm00001eb272810	Zm00001eb240610	Zm00001eb240590	Zm00001eb240590	Zm00001eb272760	Zm00001eb240650	Zm00001eb240650	Zm00001eb240650		Zm00001eb425970	Zm00001eb150860	Zm00001eb129860	Zm00001eb097360	Zm00001eb272770	Zm00001eb240520	Zm00001eb150800	Zm00001eb129910			MF	Molecular Function
	Zm00001eb272800	Zm00001eb240610	Zm00001eb240610	Zm00001eb272770	Zm00001eb272760	Zm00001eb272760	Zm00001eb272760		Zm00001eb425960	Zm00001eb240590	Zm00001eb150860	Zm00001eb129860	Zm00001eb425910	Zm00001eb272770	Zm00001eb240520	Zm00001eb150800			K10	10 KB
	Zm00001eb272810	Zm00001eb272800	Zm00001eb272800	Zm00001eb240510	Zm00001eb272770	Zm00001eb272770	Zm00001eb272770			Zm00001eb272810	Zm00001eb183190	Zm00001eb150860	Zm00001eb240630	Zm00001eb425910	Zm00001eb272770	Zm00001eb240520			K50	50 KB
	Zm00001eb240590	Zm00001eb272810	Zm00001eb272810	Zm00001eb272760	Zm00001eb240510	Zm00001eb240510	Zm00001eb240510			Zm00001eb425970	Zm00001eb240590	Zm00001eb183190	Zm00001eb272760	Zm00001eb150790	Zm00001eb425910	Zm00001eb272770			K100	100 KB
	Zm00001eb272800	Zm00001eb027130	Zm00001eb027130	Zm00001eb272870	Zm00001eb240540	Zm00001eb240540	Zm00001eb240540			Zm00001eb272800	Zm00001eb272810	Zm00001eb240590	Zm00001eb425900	Zm00001eb240630	Zm00001eb097420	Zm00001eb425910			K150	150 KB
	Zm00001eb272810	Zm00001eb240590	Zm00001eb240590	Zm00001eb240630	Zm00001eb272760	Zm00001eb272760	Zm00001eb272760			Zm00001eb425960	Zm00001eb425970	Zm00001eb272810	Zm00001eb240510	Zm00001eb272760	Zm00001eb150790	Zm00001eb097420			K200	200 KB
		Zm00001eb240610	Zm00001eb240610	Zm00001eb272750	Zm00001eb272870	Zm00001eb272870	Zm00001eb272870			Zm00001eb425950	Zm00001eb027130	Zm00001eb425970	Zm00001eb272750	Zm00001eb425900	Zm00001eb240630	Zm00001eb150790			K300	300 KB
		Zm00001eb272800	Zm00001eb272800	Zm00001eb027140	Zm00001eb240530	Zm00001eb240530	Zm00001eb240530				Zm00001eb150840	Zm00001eb027130	Zm00001eb426010	Zm00001eb150780	Zm00001eb272760	Zm00001eb240630			K400	400 KB
		Zm00001eb272810	Zm00001eb272810	Zm00001eb240590	Zm00001eb240630	Zm00001eb240630	Zm00001eb240630				Zm00001eb240610	Zm00001eb097340	Zm00001eb426020	Zm00001eb240510	Zm00001eb425900	Zm00001eb272760			K500	500 KB
		Zm00001eb240620	Zm00001eb027150	Zm00001eb240610	Zm00001eb272750	Zm00001eb272750	Zm00001eb272750				Zm00001eb272800	Zm00001eb129850	Zm00001eb426030	Zm00001eb272750	Zm00001eb150780	Zm00001eb425900
		Zm00001eb272820	Zm00001eb240580	Zm00001eb272800	Zm00001eb240520	Zm00001eb240520	Zm00001eb240520				Zm00001eb425960	Zm00001eb150840	Zm00001eb426040	Zm00001eb426010	Zm00001eb240510	Zm00001eb097290
		Zm00001eb272830	Zm00001eb240620	Zm00001eb272810	Zm00001eb240640	Zm00001eb240640	Zm00001eb240640				Zm00001eb272820	Zm00001eb183200	Zm00001eb426050	Zm00001eb150770	Zm00001eb272750	Zm00001eb150780
		Zm00001eb272840	Zm00001eb272820	Zm00001eb027130	Zm00001eb272740	Zm00001eb272740	Zm00001eb272740				Zm00001eb425950	Zm00001eb240610	Zm00001eb027140	Zm00001eb240640	Zm00001eb426010	Zm00001eb240510
			Zm00001eb027160	Zm00001eb240590	Zm00001eb240510	Zm00001eb240510	Zm00001eb240510				Zm00001eb272830	Zm00001eb272800	Zm00001eb097360	Zm00001eb272740	Zm00001eb150770	Zm00001eb272750
			Zm00001eb240570	Zm00001eb240610	Zm00001eb240650	Zm00001eb240650	Zm00001eb240650				Zm00001eb272840	Zm00001eb425960	Zm00001eb129860	Zm00001eb426020	Zm00001eb240640	Zm00001eb426010
			Zm00001eb240630	Zm00001eb272800	Zm00001eb272730	Zm00001eb272730	Zm00001eb272730					Zm00001eb027150	Zm00001eb150860	Zm00001eb240650	Zm00001eb272740	Zm00001eb097480
			Zm00001eb272830	Zm00001eb272810	Zm00001eb272880	Zm00001eb272880	Zm00001eb272880					Zm00001eb150880	Zm00001eb183190	Zm00001eb272880	Zm00001eb426020	Zm00001eb150770
			Zm00001eb240560	Zm00001eb027150	Zm00001eb272730	Zm00001eb240500	Zm00001eb240500					Zm00001eb240580	Zm00001eb240590	Zm00001eb426030	Zm00001eb150750	Zm00001eb240640
			Zm00001eb240640	Zm00001eb240580	Zm00001eb272880	Zm00001eb240660	Zm00001eb240660					Zm00001eb272820	Zm00001eb272810	Zm00001eb272730	Zm00001eb240650	Zm00001eb272740
			Zm00001eb272840	Zm00001eb240620	Zm00001eb272890	Zm00001eb272730	Zm00001eb272730					Zm00001eb425950	Zm00001eb425970	Zm00001eb272890	Zm00001eb272880	Zm00001eb426020
			Zm00001eb240550	Zm00001eb272820	Zm00001eb272720	Zm00001eb272880	Zm00001eb272880					Zm00001eb027160	Zm00001eb027130	Zm00001eb426040	Zm00001eb426030	Zm00001eb150750
			Zm00001eb272780	Zm00001eb027160	Zm00001eb272900	Zm00001eb272890	Zm00001eb272890					Zm00001eb240570	Zm00001eb097340	Zm00001eb272900	Zm00001eb240660	Zm00001eb240650
			Zm00001eb272850	Zm00001eb240570	Zm00001eb272730	Zm00001eb240660	Zm00001eb240660					Zm00001eb272830	Zm00001eb129850	Zm00001eb426050	Zm00001eb272730	Zm00001eb272880
			Zm00001eb240620	Zm00001eb240630	Zm00001eb027140	Zm00001eb240670	Zm00001eb240670					Zm00001eb425980	Zm00001eb129880	Zm00001eb272730	Zm00001eb272890	Zm00001eb426030
			Zm00001eb272850	Zm00001eb272830	Zm00001eb240590	Zm00001eb272720	Zm00001eb272720					Zm00001eb240560	Zm00001eb150840	Zm00001eb425890	Zm00001eb426040	Zm00001eb150740
			Zm00001eb272860	Zm00001eb027180	Zm00001eb240610	Zm00001eb272890	Zm00001eb272890					Zm00001eb272840	Zm00001eb183200	Zm00001eb425880	Zm00001eb240500	Zm00001eb240660
			Zm00001eb272770	Zm00001eb240560	Zm00001eb272800	Zm00001eb272900	Zm00001eb272900					Zm00001eb425990	Zm00001eb240610	Zm00001eb425870	Zm00001eb272890	Zm00001eb272730
			Zm00001eb272870	Zm00001eb240640	Zm00001eb272810	Zm00001eb240670	Zm00001eb240670					Zm00001eb240550	Zm00001eb272800	Zm00001eb027140	Zm00001eb272900	Zm00001eb272890
				Zm00001eb272840	Zm00001eb027130	Zm00001eb240680	Zm00001eb240680					Zm00001eb272850	Zm00001eb425960	Zm00001eb097360	Zm00001eb426050	Zm00001eb426040
				Zm00001eb240550	Zm00001eb240590	Zm00001eb272720	Zm00001eb272720					Zm00001eb425940	Zm00001eb027150	Zm00001eb129860	Zm00001eb240670	Zm00001eb150730
				Zm00001eb240580	Zm00001eb240610	Zm00001eb272730	Zm00001eb272730					Zm00001eb240620	Zm00001eb097370	Zm00001eb150860	Zm00001eb272720	Zm00001eb240500
				Zm00001eb272780	Zm00001eb272800	Zm00001eb272890	Zm00001eb272890					Zm00001eb272860	Zm00001eb129880	Zm00001eb183190	Zm00001eb272730	Zm00001eb272890
				Zm00001eb272850	Zm00001eb272810	Zm00001eb240490	Zm00001eb240490					Zm00001eb425930	Zm00001eb129890	Zm00001eb240590	Zm00001eb425890	Zm00001eb272900
				Zm00001eb240570	Zm00001eb027150	Zm00001eb240690	Zm00001eb240690					Zm00001eb272870	Zm00001eb150880	Zm00001eb272810	Zm00001eb240490	Zm00001eb426050
				Zm00001eb240620	Zm00001eb240580	Zm00001eb272720	Zm00001eb272720						Zm00001eb183210	Zm00001eb425970	Zm00001eb272720	Zm00001eb150930
				Zm00001eb272850	Zm00001eb240620	Zm00001eb272900	Zm00001eb272900						Zm00001eb240580	Zm00001eb426060	Zm00001eb272900	Zm00001eb240670
				Zm00001eb272860	Zm00001eb272820	Zm00001eb240700	Zm00001eb240680						Zm00001eb272820	Zm00001eb027130	Zm00001eb425880	Zm00001eb272720
				Zm00001eb240540	Zm00001eb027160	Zm00001eb272710	Zm00001eb240700						Zm00001eb425950	Zm00001eb097340	Zm00001eb272710	Zm00001eb272730
				Zm00001eb240560	Zm00001eb240570	Zm00001eb027140	Zm00001eb272710						Zm00001eb027160	Zm00001eb129850	Zm00001eb425870	Zm00001eb425890
				Zm00001eb272770	Zm00001eb240630	Zm00001eb240590	Zm00001eb027140						Zm00001eb097380	Zm00001eb129880	Zm00001eb027140	Zm00001eb150720
				Zm00001eb272870	Zm00001eb272830	Zm00001eb240610	Zm00001eb240590						Zm00001eb129850	Zm00001eb150840	Zm00001eb097360	Zm00001eb240490
				Zm00001eb240530	Zm00001eb027180	Zm00001eb272800	Zm00001eb240610						Zm00001eb129890	Zm00001eb183200	Zm00001eb129860	Zm00001eb272720
				Zm00001eb240550	Zm00001eb240560	Zm00001eb272810	Zm00001eb272800						Zm00001eb150890	Zm00001eb240610	Zm00001eb150860	Zm00001eb272900
				Zm00001eb272780	Zm00001eb240640	Zm00001eb272910	Zm00001eb272810						Zm00001eb240570	Zm00001eb272800	Zm00001eb183190	Zm00001eb425880
				Zm00001eb272860	Zm00001eb272840	Zm00001eb272700	Zm00001eb240500						Zm00001eb272830	Zm00001eb425960	Zm00001eb240590	Zm00001eb150940
					Zm00001eb240550	Zm00001eb027130	Zm00001eb240690						Zm00001eb425980	Zm00001eb027150	Zm00001eb272810	Zm00001eb240680
					Zm00001eb240580	Zm00001eb240590	Zm00001eb272910						Zm00001eb027180	Zm00001eb097370	Zm00001eb425970	Zm00001eb272710
					Zm00001eb272780	Zm00001eb240610	Zm00001eb240490						Zm00001eb097330	Zm00001eb129880	Zm00001eb272910	Zm00001eb425870
					Zm00001eb272850	Zm00001eb272800	Zm00001eb240700						Zm00001eb150900	Zm00001eb129890	Zm00001eb426060	Zm00001eb027140
					Zm00001eb240570	Zm00001eb272810	Zm00001eb272700						Zm00001eb240560	Zm00001eb150880	Zm00001eb272700	Zm00001eb097360
					Zm00001eb240620	Zm00001eb027150	Zm00001eb272690						Zm00001eb272840	Zm00001eb183210	Zm00001eb426070	Zm00001eb129860
					Zm00001eb272850	Zm00001eb240580	Zm00001eb272680						Zm00001eb425990	Zm00001eb240580	Zm00001eb027130	Zm00001eb150860
					Zm00001eb272860	Zm00001eb240620	Zm00001eb272670						Zm00001eb097310	Zm00001eb272820	Zm00001eb097340	Zm00001eb183190
					Zm00001eb240540	Zm00001eb272820	Zm00001eb027130						Zm00001eb150910	Zm00001eb425950	Zm00001eb129850	Zm00001eb240590
					Zm00001eb240560	Zm00001eb027160	Zm00001eb240590						Zm00001eb240550	Zm00001eb027160	Zm00001eb129880	Zm00001eb272810
					Zm00001eb272770	Zm00001eb240570	Zm00001eb240610						Zm00001eb272850	Zm00001eb097380	Zm00001eb150840	Zm00001eb425970
					Zm00001eb272870	Zm00001eb240630	Zm00001eb272800						Zm00001eb425940	Zm00001eb129850	Zm00001eb183200	Zm00001eb150710
					Zm00001eb240530	Zm00001eb272830	Zm00001eb272810						Zm00001eb150830	Zm00001eb129890	Zm00001eb240610	Zm00001eb240690
					Zm00001eb240550	Zm00001eb027180	Zm00001eb027150						Zm00001eb240620	Zm00001eb150890	Zm00001eb272800	Zm00001eb272910
					Zm00001eb272780	Zm00001eb240560	Zm00001eb240580						Zm00001eb272860	Zm00001eb183220	Zm00001eb425960	Zm00001eb426060
					Zm00001eb272860	Zm00001eb240640	Zm00001eb240620						Zm00001eb425930	Zm00001eb240570	Zm00001eb027150	Zm00001eb150950
						Zm00001eb272840	Zm00001eb272820						Zm00001eb240540	Zm00001eb272830	Zm00001eb097370	Zm00001eb240700
						Zm00001eb240550	Zm00001eb027160						Zm00001eb272870	Zm00001eb425980	Zm00001eb129880	Zm00001eb272700
						Zm00001eb240580	Zm00001eb240570						Zm00001eb426000	Zm00001eb027180	Zm00001eb129890	Zm00001eb426070
						Zm00001eb272780	Zm00001eb240630						Zm00001eb240530	Zm00001eb097330	Zm00001eb150880	Zm00001eb150690
						Zm00001eb272850	Zm00001eb272830						Zm00001eb272780	Zm00001eb129840	Zm00001eb183210	Zm00001eb272690
						Zm00001eb240570	Zm00001eb027180						Zm00001eb425920	Zm00001eb150900	Zm00001eb240580	Zm00001eb426080
						Zm00001eb240620	Zm00001eb240560							Zm00001eb183180	Zm00001eb272820	Zm00001eb272680
						Zm00001eb272850	Zm00001eb240640							Zm00001eb240560	Zm00001eb425950	Zm00001eb426090
						Zm00001eb272860	Zm00001eb272840							Zm00001eb272840	Zm00001eb027160	Zm00001eb272670
						Zm00001eb240540	Zm00001eb240550							Zm00001eb425990	Zm00001eb097380	Zm00001eb426100
						Zm00001eb240560	Zm00001eb240580							Zm00001eb097310	Zm00001eb129850	Zm00001eb426110
						Zm00001eb272770	Zm00001eb272780							Zm00001eb150910	Zm00001eb129890	Zm00001eb425860
						Zm00001eb272870	Zm00001eb272850							Zm00001eb240550	Zm00001eb150890	Zm00001eb426120
						Zm00001eb240530	Zm00001eb240570							Zm00001eb272850	Zm00001eb183220	Zm00001eb426130
						Zm00001eb240550	Zm00001eb240620							Zm00001eb425940	Zm00001eb240570	Zm00001eb426140
						Zm00001eb272780	Zm00001eb272850							Zm00001eb097300	Zm00001eb272830	Zm00001eb027130
						Zm00001eb272860	Zm00001eb272860							Zm00001eb150830	Zm00001eb425980	Zm00001eb097340
							Zm00001eb240540							Zm00001eb240620	Zm00001eb027180	Zm00001eb129850
							Zm00001eb240560							Zm00001eb272860	Zm00001eb097330	Zm00001eb129880
							Zm00001eb272770							Zm00001eb425930	Zm00001eb129840	Zm00001eb150840
							Zm00001eb272870							Zm00001eb097390	Zm00001eb150900	Zm00001eb183200
							Zm00001eb240530							Zm00001eb150820	Zm00001eb183180	Zm00001eb240610
							Zm00001eb240550							Zm00001eb240540	Zm00001eb240560	Zm00001eb272800
							Zm00001eb272780							Zm00001eb272870	Zm00001eb272840	Zm00001eb425960
							Zm00001eb272860							Zm00001eb426000	Zm00001eb425990	Zm00001eb426150
														Zm00001eb150810	Zm00001eb097310	Zm00001eb027150
														Zm00001eb240530	Zm00001eb129830	Zm00001eb097370
														Zm00001eb272780	Zm00001eb129900	Zm00001eb129880
														Zm00001eb425920	Zm00001eb150910	Zm00001eb129890
															Zm00001eb183170	Zm00001eb150880
															Zm00001eb240550	Zm00001eb183210
															Zm00001eb272850	Zm00001eb240580
															Zm00001eb425940	Zm00001eb272820
															Zm00001eb097300	Zm00001eb425950
															Zm00001eb129830	Zm00001eb027160
															Zm00001eb129900	Zm00001eb097380
															Zm00001eb150830	Zm00001eb129850
															Zm00001eb183240	Zm00001eb129890
															Zm00001eb240620	Zm00001eb150890
															Zm00001eb272860	Zm00001eb183220
															Zm00001eb425930	Zm00001eb240570
															Zm00001eb097390	Zm00001eb272830
															Zm00001eb129820	Zm00001eb425980
															Zm00001eb150820	Zm00001eb027180
															Zm00001eb183160	Zm00001eb097330
															Zm00001eb240540	Zm00001eb129840
															Zm00001eb272870	Zm00001eb150900
															Zm00001eb426000	Zm00001eb183180
															Zm00001eb097400	Zm00001eb240560
															Zm00001eb150810	Zm00001eb272840
															Zm00001eb183150	Zm00001eb425990
															Zm00001eb240530	Zm00001eb097310
															Zm00001eb272780	Zm00001eb129830
															Zm00001eb425920	Zm00001eb129900
																Zm00001eb150910
																Zm00001eb183170
																Zm00001eb240550
																Zm00001eb272850
																Zm00001eb425940
																Zm00001eb097300
																Zm00001eb129830
																Zm00001eb129900
																Zm00001eb150830
																Zm00001eb183240
																Zm00001eb240620
																Zm00001eb272860
																Zm00001eb425930
																Zm00001eb097390
																Zm00001eb129820
																Zm00001eb150820
																Zm00001eb183160
																Zm00001eb240540
																Zm00001eb272870
																Zm00001eb426000
																Zm00001eb097400
																Zm00001eb129810
																Zm00001eb150810
																Zm00001eb183150
																Zm00001eb240530
																Zm00001eb272780
																Zm00001eb425920
