# Supplementary material for: Archaeological Bolivian maize genomes suggest diversity is associated with Inca cultural expansion and environmental variation in South America
Source: Research Square preprint supplement (doi:10.21203/rs.3.rs-2592230/v1), 2023-03-03
Supplement: Supplementary file 2 [file 4b832e2b8567559a570c49a2.xlsx]

## Sheet: Supplementary Data Set 1
Supplementary DataSet 1. Modern Sample information.
	ID	Sample	BioProject	geo_loc_name_country	area	geo_loc_name	latitude	longitude	Organism	Population
1	USA_HotevillaArizona	SAMN04225700	PRJNA300309	USA	North America	USA: Hotevilla\, Arizona	35.9N	110.67W	Zea mays subsp. mays	SW_US
2	USA_AcomaPueblo	SAMN04225701	PRJNA300309	USA	North America	USA: Acoma Pueblo\, New Mexico	34.9N	107.58W	Zea mays subsp. mays	SW_US
3	USA_JemezPueblo	SAMN04225702	PRJNA300309	USA	North America	USA:Jemez Pueblo\, New Mexico	35.62N	106.73W	Zea mays subsp. mays	SW_US
4	USA_SanLorenzoPueblo	SAMN04225703	PRJNA300309	USA	North America	USA: San Lorenzo Pueblo\, New Mexico	36.05N	106.28W	Zea mays subsp. mays	SW_US
5	USA_TesuquePueblo	SAMN04225704	PRJNA300309	USA	North America	USA: Tesuque Pueblo\, New Mexico	35.76N	105.93W	Zea mays subsp. mays	SW_US
6	USA_TaosPueblo	SAMN04225705	PRJNA300309	USA	North America	USA: Taos Pueblo\, New Mexico	36.45N	105.55W	Zea mays subsp. mays	SW_US
7	Mexico_Jalisco	SAMN04225706	PRJNA300309	Mexico	North America	Mexico: Jalisco	20.03N	103.68W	Zea mays subsp. mays	Mex_Highland
8	Mexico_Zacatecas	SAMN04225707	PRJNA300309	Mexico	North America	Mexico: Zacatecas	21.37N	102.85W	Zea mays subsp. mays	Mex_Highland
9	Mexico	SAMN04225708	PRJNA300309	Mexico	North America	Mexico	19.68N	99.13W	Zea mays subsp. mays	Mex_Highland
10	Mexico_LaConcordiaGuerrero	SAMN04225709	PRJNA300309	Mexico	North America	Mexico: La Concordia\, Guerrero	16.85N	99.07W	Zea mays subsp. mays	Mex_Lowland
11	Mexico_Puebla1	SAMN04225710	PRJNA300309	Mexico	North America	Mexico: Puebla	19.85N	97.98W	Zea mays subsp. mays	Mex_Highland
12	Mexico_Puebla2	SAMN04225711	PRJNA300309	Mexico	North America	Mexico: Puebla	19.88N	97.58W	Zea mays subsp. mays	Mex_Highland
13	Mexico_Puebla3	SAMN04225712	PRJNA300309	Mexico	North America	Mexico: Puebla	19N	97.38W	Zea mays subsp. mays	Mex_Highland
14	Mexico_Oaxac	SAMN04225713	PRJNA300309	Mexico	North America	Mexico: Oaxac	16.57N	94.62W	Zea mays subsp. mays	Mex_Lowland
15	Mexico_Chiapas	SAMN04225714	PRJNA300309	Mexico	North America	Mexico: Chiapas	15.43N	92.9W	Zea mays subsp. mays	Mex_Lowland
16	Guatemala_SanMarcos1	SAMN04225715	PRJNA300309	Guatemala	South America	Guatemala: San Marcos	15.03N	91.78W	Zea mays subsp. mays	Gua_Highland
17	Guatemala_SanMarcos2	SAMN04225716	PRJNA300309	Guatemala	South America	Guatemala: San Marcos	14.97N	91.77W	Zea mays subsp. mays	Gua_Highland
18	Guatemala_Totonicapan	SAMN04225717	PRJNA300309	Guatemala	South America	Guatemala: Totonicapan	14.92N	91.33W	Zea mays subsp. mays	Gua_Highland
19	Guatemala	SAMN04225718	PRJNA300309	Guatemala	South America	Guatemala	15.47N	88.85W	Zea mays subsp. mays	Mex_Lowland
20	Mexico_Yucatan	SAMN04225719	PRJNA300309	Mexico	North America	Mexico: Yucatan	20.83N	88.52W	Zea mays subsp. mays	Mex_Lowland
21	Ecuador1	SAMN04225720	PRJNA300309	Ecuador	South America	Ecuador	0.92S	78.92W	Zea mays subsp. mays	Andes
22	Ecuador2	SAMN04225721	PRJNA300309	Ecuador	South America	Ecuador	0N	78W	Zea mays subsp. mays	Andes
23	Peru_Ancash1	SAMN04225722	PRJNA300309	Peru	South America	Peru: Ancash	8.7S	77.38W	Zea mays subsp. mays	Andes
24	Colombia_Choco	SAMN04225723	PRJNA300309	Colombia	South America	Colombia: Choco	8.5N	77.27W	Zea mays subsp. mays	SA_Lowland
25	Peru_Ancash2	SAMN04225724	PRJNA300309	Peru	South America	Peru: Ancash	9.38S	77.17W	Zea mays subsp. mays	Andes
26	Colombia_Magdalena1	SAMN04225725	PRJNA300309	Colombia	South America	Colombia: Magdalena	9.43N	75.7W	Zea mays subsp. mays	SA_Lowland
27	Colombia_Caldas	SAMN04225726	PRJNA300309	Colombia	South America	Colombia: Caldas	4.52N	75.63W	Zea mays subsp. mays	SA_Lowland
28	Colombia_Caqueta	SAMN04225727	PRJNA300309	Colombia	South America	Colombia: Caqueta	1.75N	75.58W	Zea mays subsp. mays	SA_Lowland
29	Colombia_Cordoba	SAMN04225728	PRJNA300309	Colombia	South America	Colombia: Cordoba	8.32N	75.15W	Zea mays subsp. mays	SA_Lowland
30	Colombia_Magdalena2	SAMN04225729	PRJNA300309	Colombia	South America	Colombia: Magdalena	10.18N	74.05W	Zea mays subsp. mays	SA_Lowland
31	Peru_Apurimac	SAMN04225730	PRJNA300309	Peru	South America	Peru:Apurimac	14.32S	72.92W	Zea mays subsp. mays	Andes
32	Peru_Lalibertad1	SAMN09622434	PRJNA479960	Peru	South America	Peru:La libertad	6S	80W	Zea mays	NA
33	Peru_Lima	SAMN09622435	PRJNA479960	Peru	South America	Peru:Lima	11S	78W	Zea mays	NA
34	Peru_Apurimac1	SAMN09622436	PRJNA479960	Peru	South America	Peru:Apurimac	14S	73W	Zea mays	NA
35	Peru_Ica	SAMN09622437	PRJNA479960	Peru	South America	Peru:Ica	15S	75W	Zea mays	NA
36	Peru_Arequipa	SAMN09622438	PRJNA479960	Peru	South America	Peru:Arequipa	17S	72W	Zea mays	NA
37	Peru_Lambayeque	SAMN09622439	PRJNA479960	Peru	South America	Peru:Lambayeque	6S	80W	Zea mays	NA
38	Peru_Ayacucho	SAMN09622440	PRJNA479960	Peru	South America	Peru:Ayacucho	13S	74W	Zea mays	NA
39	Peru_Amazonas	SAMN09622441	PRJNA479960	Peru	South America	Peru:Amazonas	6S	78W	Zea mays	NA
40	Peru_Lalibertad2	SAMN09622442	PRJNA479960	Peru	South America	Peru:La libertad	7S	80W	Zea mays	NA
41	Peru_Ancash3	SAMN09622443	PRJNA479960	Peru	South America	Peru:Ancash	9S	77W	Zea mays	NA
42	Peru_Apurimac2	SAMN09622444	PRJNA479960	Peru	South America	Peru:Apurimac	13S	73W	Zea mays	NA
43	Peru_SanMartin	SAMN09622445	PRJNA479960	Peru	South America	Peru:San Martin	7.000S	77.000W	Zea mays	NA
44	Peru_Apurimac3	SAMN09622446	PRJNA479960	Peru	South America	Peru:Apurimac	14.14S	72.49W	Zea mays	NA
45	Peru_Ancash4	SAMN09622447	PRJNA479960	Peru	South America	Peru:Ancash	8S	78W	Zea mays	NA
46	Peru_Puno	SAMN09622448	PRJNA479960	Peru	South America	Peru:Puno	14S	70W	Zea mays	NA
47	Brazil_Acre1	SAMN09622449	PRJNA479960	Brazil	South America	Brazil:Acre	8.103S	70.181W	Zea mays	NA
48	Brazil_Rondonia1	SAMN09622450	PRJNA479960	Brazil	South America	Brazil:Rondonia	10.471S	65.201W	Zea mays	NA
49	Brazil_Parana	SAMN09622451	PRJNA479960	Brazil	South America	Brazil:Parana	26.041S	53.042W	Zea mays	NA
50	Peru_Apurimac4	SAMN09622452	PRJNA479960	Peru	South America	Peru:Apurimac	14S	73W	Zea mays	NA
51	Paraguay	SAMN09622453	PRJNA479960	Paraguay	South America	Paraguay	22S	58W	Zea mays	NA
52	Brazil_Para1	SAMN09622454	PRJNA479960	Brazil	South America	Brazil:Para	1.584S	50.483W	Zea mays	NA
53	Brazil_SaoPaulo1	SAMN09622455	PRJNA479960	Brazil	South America	Brazil:Sao Paulo	22S	51W	Zea mays	NA
54	Brazil_Para2	SAMN09622456	PRJNA479960	Brazil	South America	Brazil:Para	1.495S	53.272W	Zea mays	NA
55	Brazil_Altamira	SAMN09622457	PRJNA479960	Brazil	South America	Brazil:Altamira	3.154S	52.132W	Zea mays	NA
56	Brazil_Maranhao	SAMN09622458	PRJNA479960	Brazil	South America	Brazil:Maranhao	3.454S	45.165W	Zea mays	NA
57	Brazil_Acre2	SAMN09622459	PRJNA479960	Brazil	South America	Brazil:Acre	8.093S	70.46W	Zea mays	NA
58	Brazil_SaoPaulo2	SAMN09622460	PRJNA479960	Brazil	South America	Brazil:Sao Paulo	23S	46W	Zea mays	NA
59	Brazil_Rondonia2	SAMN09622461	PRJNA479960	Brazil	South America	Brazil:Rondonia	10.471S	65.201W	Zea mays	NA
60	Brazil_Acre3	SAMN09622462	PRJNA479960	Brazil	South America	Brazil:Acre	10.395S	68.253W	Zea mays	NA
61	Brazil_MatoGrossoSul	SAMN09622463	PRJNA479960	Brazil	South America	Brazil:Mato Grosso Sul	23.062S	55.134W	Zea mays	NA
62	Brazil_Para3	SAMN09622464	PRJNA479960	Brazil	South America	Brazil:Para	2.353S	51.562W	Zea mays	NA
63	Brazil_Rondonia3	SAMN09622465	PRJNA479960	Brazil	South America	Brazil:Rondonia	10.471S	65.201W	Zea mays	NA
64	Brazil_MatoGrosso	SAMN09622466	PRJNA479960	Brazil	South America	Brazil:Mato Grosso	12.144S	53.341W	Zea mays	NA
65	Brazil_Goias	SAMN09622467	PRJNA479960	Brazil	South America	Brazil:Goias	11.343S	50.403W	Zea mays	NA
66	Brazil_Roraima4	SAMN09622468	PRJNA479960	Brazil	South America	Brazil:Roraima	2.483N	60.404W	Zea mays	NA
67	Brazil_Roraima5	SAMN09622469	PRJNA479960	Brazil	South America	Brazil:Roraima	1.493N	61.074W	Zea mays	NA
68	Peru_Junin	SAMN09622470	PRJNA479960	Peru	South America	Peru:Junin	12S	75W	Zea mays	NA
69	Peru_Apurimac5	SAMN09622471	PRJNA479960	Peru	South America	Peru:Apurimac	13S	72W	Zea mays	NA
70	Peru_MadredeDios	SAMN09622472	PRJNA479960	Peru	South America	Peru:Madre de Dios	11S	70W	Zea mays	NA
71	Peru_Apurimac6	SAMN09622473	PRJNA479960	Peru	South America	Peru:Apurimac	14S	73W	Zea mays	NA
72	Mexico_Amatlan_Z.may.ssp.mexicana1	SAMN15812923	PRJNA657016	Mexico	North America	Mexico:Amatlan	18.9719N	99.0551W	Zea mays subsp. mexicana	Elevation: 1658 m
73	Mexico_Jicaltepec_Z.may.ssp.mexicana1	SAMN15812924	PRJNA657016	Mexico	North America	Mexico:Jicaltepec	19.3764N	99.6303W	Zea mays subsp. mexicana	Elevation: 2587 m
74	Mexico_Xochimilco_Z.may.ssp.mexicana1	SAMN15812925	PRJNA657016	Mexico	North America	Mexico:Xochimilco	19.2861N	99.0827W	Zea mays subsp. mexicana	Elevation: 2237 m
75	Mexico_Opopeo_Z.may.ssp.mexicana1	SAMN15812930	PRJNA657016	Mexico	North America	Mexico:Opopeo	19.4181N	101.613W	Zea mays subsp. mexicana	Elevation: 2213 m
76	Mexico_Puruandiro_1	SAMN15812931	PRJNA657016	Mexico	North America	Mexico:Puruandiro	20.1076N	101.49W	Zea mays subsp. mays	Elevation: 1915 m
77	Mexico_Nabogame_Z.may.ssp.mexicana1	SAMN15813124	PRJNA657016	Mexico	North America	Mexico:Nabogame	26.2465N	106.915W	Zea mays subsp. mexicana	Elevation: 2020 m
78	Mexico_SanPedro_Z.may.ssp.mexicana1	SAMN15813125	PRJNA657016	Mexico	North America	Mexico:San Pedro	19.0886N	98.4935W	Zea mays subsp. mexicana	Elevation: 2459 m
79	Mexico_Opopeo_Z.may.ssp.mexicana2	SAMN15813126	PRJNA657016	Mexico	North America	Mexico:Opopeo	19.4181N	101.613W	Zea mays subsp. mexicana	Elevation: 2213 m
80	Mexico_Amatlan	SAMN15813127	PRJNA657016	Mexico	North America	Mexico:Amatlan	18.9719N	99.0551W	Zea mays subsp. mays	Elevation: 1658 m
81	Mexico_Malinalco_Z.may.ssp.mexicana1	SAMN15813128	PRJNA657016	Mexico	North America	Mexico:Malinalco	18.9531N	99.503W	Zea mays subsp. mexicana	Elevation: 1887 m
82	Mexico_Amecameca_Z.may.ssp.mexicana1	SAMN15813129	PRJNA657016	Mexico	North America	Mexico:Amecameca	19.139N	98.7733W	Zea mays subsp. mexicana	Elevation: 2467 m
83	Mexico_Penjamillo_Z.may.ssp.mexicana1	SAMN15813130	PRJNA657016	Mexico	North America	Mexico:Penjamillo	20.1176N	101.93W	Zea mays subsp. mexicana	Elevation: 1705 m
84	Mexico_Jicaltepec_Z.may.ssp.mexicana2	SAMN15813131	PRJNA657016	Mexico	North America	Mexico:Jicaltepec	19.3764N	99.6303W	Zea mays subsp. mexicana	Elevation: 2587 m
85	Mexico_Puruandiro2	SAMN15813132	PRJNA657016	Mexico	North America	Mexico:Puruandiro	20.1076N	101.49W	Zea mays subsp. mays	Elevation: 1915 m
86	Mexico_Ixtlan_Zeamayssubsp_mexicana	SAMN15813133	PRJNA657016	Mexico	North America	Mexico:Ixtlan	20.1683N	102.373W	Zea mays subsp. mexicana	Elevation: 1547 m
87	Mexico_SantaClara_Z.may.ssp.mexicana1	SAMN15813134	PRJNA657016	Mexico	North America	Mexico:Santa Clara	19.4184N	101.642W	Zea mays subsp. mexicana	Elevation: 2173 m
88	Mexico_Tlapala_Z.may.ssp.mexicana1	SAMN15813135	PRJNA657016	Mexico	North America	Mexico:Tlapala	19.2351N	98.8368W	Zea mays subsp. mexicana	Elevation: 2272 m
89	Mexico_SantaClara_Z.may.ssp.mexicana2	SAMN15813136	PRJNA657016	Mexico	North America	Mexico:Santa Clara	19.4184N	101.642W	Zea mays subsp. mexicana	Elevation: 2173 m
90	Mexico_Jicaltepec1	SAMN15813137	PRJNA657016	Mexico	North America	Mexico:Jicaltepec	19.3764N	99.6303W	Zea mays subsp. mays	Elevation: 2587 m
91	Mexico_Puruandiro_Zeamayssubsp_mexicana	SAMN15813138	PRJNA657016	Mexico	North America	Mexico:Puruandiro	20.1076N	101.49W	Zea mays subsp. mexicana	Elevation: 1915 m
92	Mexico_Nabogame1	SAMN15813139	PRJNA657016	Mexico	North America	Mexico:Nabogame	26.2465N	106.915W	Zea mays subsp. mays	Elevation: 2020 m
93	Mexico_Malinalco_Z.may.ssp.mexicana2	SAMN15813140	PRJNA657016	Mexico	North America	Mexico:Malinalco	18.9531N	99.503W	Zea mays subsp. mexicana	Elevation: 1887 m
94	Mexico_Tlapala	SAMN15813141	PRJNA657016	Mexico	North America	Mexico:Tlapala	19.2351N	98.8368W	Zea mays subsp. mays	Elevation: 2272 m
95	Mexico_Penjamillo_Z.may.ssp.mexicana2	SAMN15813142	PRJNA657016	Mexico	North America	Mexico:Penjamillo	20.1176N	101.93W	Zea mays subsp. mexicana	Elevation: 1705 m
96	Mexico_Amecameca_Z.may.ssp.mexicana2	SAMN15813143	PRJNA657016	Mexico	North America	Mexico:Amecameca	19.139N	98.7733W	Zea mays subsp. mexicana	Elevation: 2467 m
97	Mexico_SantaClara	SAMN15813144	PRJNA657016	Mexico	North America	Mexico:Santa Clara	19.4184N	101.642W	Zea mays subsp. mays	Elevation: 2173 m
98	Mexico_Amatlan_Z.may.ssp.mexicana2	SAMN15813165	PRJNA657016	Mexico	North America	Mexico:Amatlan	18.9719N	99.0551W	Zea mays subsp. mexicana	Elevation: 1658 m
99	Mexico_SanPedro_Z.may.ssp.mexicana2	SAMN15813166	PRJNA657016	Mexico	North America	Mexico:San Pedro	19.0886N	98.4935W	Zea mays subsp. mexicana	Elevation: 2459 m
100	Mexico_Puruandiro3	SAMN15813188	PRJNA657016	Mexico	North America	Mexico:Puruandiro	20.1076N	101.49W	Zea mays subsp. mays	Elevation: 1915 m
101	Mexico_Penjamillo_Z.may.ssp.mexicana3	SAMN15813189	PRJNA657016	Mexico	North America	Mexico:Penjamillo	20.1176N	101.93W	Zea mays subsp. mexicana	Elevation: 1705 m
102	Mexico_SantaClara_Z.may.ssp.mexicana3	SAMN15813190	PRJNA657016	Mexico	North America	Mexico:Santa Clara	19.4184N	101.642W	Zea mays subsp. mexicana	Elevation: 2173 m
103	Mexico_Nabogame2	SAMN15813191	PRJNA657016	Mexico	North America	Mexico:Nabogame	26.2465N	106.915W	Zea mays subsp. mays	Elevation: 2020 m
104	Mexico_Xochimilco_Z.may.ssp.mexicana2	SAMN15813192	PRJNA657016	Mexico	North America	Mexico:Xochimilco	19.2861N	99.0827W	Zea mays subsp. mexicana	Elevation: 2237 m
105	Mexico_Opopeo_Z.may.ssp.mexicana3	SAMN15813193	PRJNA657016	Mexico	North America	Mexico:Opopeo	19.4181N	101.613W	Zea mays subsp. mexicana	Elevation: 2213 m
106	Mexico_Cocotilan_Z.may.ssp.mexicana1	SAMN15813194	PRJNA657016	Mexico	North America	Mexico:Cocotilan	19.2244N	98.8427W	Zea mays subsp. mexicana	Elevation: 2269 m
107	Mexico_Cocotilan_Z.may.ssp.mexicana2	SAMN15813195	PRJNA657016	Mexico	North America	Mexico:Cocotilan	19.2244N	98.8427W	Zea mays subsp. mexicana	Elevation: 2269 m
108	Mexico_Jicaltepec2	SAMN15813196	PRJNA657016	Mexico	North America	Mexico:Jicaltepec	19.3764N	99.6303W	Zea mays subsp. mays	Elevation: 2587 m
109	Mexico_TenangodelAire_Zeamayssubsp_mays	SAMN15813197	PRJNA657016	Mexico	North America	Mexico:Tenango del Aire	19.1197N	99.5896W	Zea mays subsp. mays	Elevation: 2609 m
110	Mexico_SanPedro1	SAMN15813198	PRJNA657016	Mexico	North America	Mexico:San Pedro	19.0886N	98.4935W	Zea mays subsp. mays	Elevation: 2459 m
111	Mexico_ElPorvenir_Zeamayssubsp_mexicana	SAMN15813199	PRJNA657016	Mexico	North America	Mexico:El Porvenir	19.6789N	100.64W	Zea mays subsp. mexicana	Elevation: 2094 m
112	Mexico_SanPedro2	SAMN15813200	PRJNA657016	Mexico	North America	Mexico:San Pedro	19.0886N	98.4935W	Zea mays subsp. mays	Elevation: 2459 m
113	Mexico_Penjamillo_Z.may.ssp.mexicana4	SAMN15813201	PRJNA657016	Mexico	North America	Mexico:Penjamillo	20.1176N	101.93W	Zea mays subsp. mexicana	Elevation: 1705 m
114	Mexico_Penjamillo_Z.may.ssp.mexicana5	SAMN15813202	PRJNA657016	Mexico	North America	Mexico:Penjamillo	20.1176N	101.93W	Zea mays subsp. mexicana	Elevation: 1705 m
115	Mexico_Tlapala_Z.may.ssp.mexicana2	SAMN15813203	PRJNA657016	Mexico	North America	Mexico:Tlapala	19.2351N	98.8368W	Zea mays subsp. mexicana	Elevation: 2272 m
116	Mexico_Nabogame_Z.may.ssp.mexicana2	SAMN15813204	PRJNA657016	Mexico	North America	Mexico:Nabogame	26.2465N	106.915W	Zea mays subsp. mexicana	Elevation: 2020 m
117	Mexico_TenangodelAire_Zeamayssubsp_mexicana	SAMN15813205	PRJNA657016	Mexico	North America	Mexico:Tenango del Aire	19.1197N	99.5896W	Zea mays subsp. mexicana	Elevation: 2609 m
118	Mexico_Opopeo_Z.may.ssp.mexicana4	SAMN15813206	PRJNA657016	Mexico	North America	Mexico:Opopeo	19.4181N	101.613W	Zea mays subsp. mexicana	Elevation: 2213 m
119	Mexico_Amecameca_Z.may.ssp.mexicana3	SAMN15813207	PRJNA657016	Mexico	North America	Mexico:Amecameca	19.139N	98.7733W	Zea mays subsp. mexicana	Elevation: 2467 m
120	Mexico_Tlapala_Z.may.ssp.mexicana3	SAMN15813208	PRJNA657016	Mexico	North America	Mexico:Tlapala	19.2351N	98.8368W	Zea mays subsp. mexicana	Elevation: 2272 m
121	Mexico_Amecameca_Z.may.ssp.mexicana4	SAMN15813209	PRJNA657016	Mexico	North America	Mexico:Amecameca	19.139N	98.7733W	Zea mays subsp. mexicana	Elevation: 2467 m
122	BKN010	SAMN00839328	Maize HapMap II; SRP011907	Bolivia	South America	NA	16.367S	60.95W	Zea mays	Altitude: 330m
123	BKN019	SAMN00839335	Maize HapMap II; SRP011907	Bolivia	South America	NA	16.6S	67.25W	Zea mays	Altitude: 1810m
124	BKN026	SAMN00839340	Maize HapMap II;SRP011907	Bolivia	South America	NA	21.517S	64.75W	Zea mays	Altitude: 1738m
125	ParviglumisTIL05	SAMN00839404	Maize HapMap II; SRP011907	NA	NA	NA	NA	NA	Zea mays subsp. parviglumis	NA
126	ParviglumisTIL10	SAMN00839410	Maize HapMap II; SRP011907	NA	NA	NA	NA	NA	Zea mays subsp. parviglumis	NA
127	ParviglumisTIL14	SAMN00839413	Maize HapMap II;SRP011907	NA	NA	NA	NA	NA	Zea mays subsp. parviglumis	NA
128	Tripsacum	SAMN00839398	Maize HapMap II; SRP011907	NA	NA	NA	NA	NA	Tripsacum dactyloides	NA
