# Supplementary material for: Archaeological Bolivian maize genomes suggest diversity is associated with Inca cultural expansion and environmental variation in South America
Source: Research Square preprint supplement (doi:10.21203/rs.3.rs-2592230/v1), 2023-03-03
Supplement: Supplementary file 3 [file 534ce827ac161c024ea72a64.xlsx]

## Sheet: Supplementary Data Set 3
Supplementary DataSet 3. Gene Ontology Enrichment of BM_vs_ancientHonduras at different distance cutoff.
BM_vs_ancientHonduras						Abbreviation	Name
K10_BP	﻿protein serine/threonine kinase activity	0.0409245	Zm00001eb272800	GO:0004674		BP	Biological Process
K100_BP	﻿fatty acid biosynthetic process	0.0305924	Zm00001eb240620	GO:0006633		CC	Cellular Componen
K100_BP	fatty acid metabolic process	0.0392228	Zm00001eb240620	GO:0006631		MF	Molecular Function
K100_BP	monocarboxylic acid biosynthetic process	0.0418992	Zm00001eb240620	GO:0072330		K10	10 KB
K150_BP	﻿'de novo' posttranslational protein folding	0.0134001	Zm00001eb240640	GO:0051084		K50	50 KB
K150_BP	chaperone cofactor-dependent protein refolding	0.0134001	Zm00001eb240640	GO:0051085		K100	100 KB
K150_BP	positive regulation of proteasomal protein catabolic process	0.0139027	Zm00001eb240630	GO:1901800		K150	150 KB
K150_BP	positive regulation of proteolysis involved in cellular protein catabolic process	0.0139027	Zm00001eb240630	GO:1903052		K200	200 KB
K150_BP	positive regulation of cellular protein catabolic process	0.0139027	Zm00001eb240630	GO:1903364		K300	300 KB
K150_BP	regulation of proteasomal protein catabolic process	0.0141539	Zm00001eb240630	GO:0061136		K400	400 KB
K150_BP	regulation of proteolysis involved in cellular protein catabolic process	0.0146563	Zm00001eb240630	GO:1903050		K500	500 KB
K150_BP	regulation of cellular protein catabolic process	0.0146563	Zm00001eb240630	GO:1903362
K150_BP	positive regulation of protein catabolic process	0.0149073	Zm00001eb240630	GO:0045732
K150_BP	positive regulation of proteolysis	0.0151583	Zm00001eb240630	GO:0045862
K150_BP	'de novo' protein folding	0.0159111	Zm00001eb240640	GO:0006458
K150_BP	regulation of protein catabolic process	0.0186668	Zm00001eb240630	GO:0042176
K150_BP	chaperone-mediated protein folding	0.0206668	Zm00001eb240640	GO:0061077
K150_BP	translational elongation	0.0216867	Zm00001eb027140,Zm00001eb272850	GO:0006414
K150_BP	positive regulation of cellular catabolic process	0.0323466	Zm00001eb240630	GO:0031331
K150_BP	positive regulation of catabolic process	0.033335	Zm00001eb240630	GO:0009896
K150_BP	regulation of proteolysis	0.0392478	Zm00001eb240630	GO:0030162
K150_BP	regulation of cellular catabolic process	0.0397391	Zm00001eb240630	GO:0031329
K150_BP	positive regulation of cellular protein metabolic process	0.0419474	Zm00001eb240630	GO:0032270
K150_BP	positive regulation of protein metabolic process	0.0429275	Zm00001eb240630	GO:0051247
K150_BP	regulation of catabolic process	0.0439067	Zm00001eb240630	GO:0009894
K200_BP	﻿'de novo' posttranslational protein folding	0.0134001	Zm00001eb240640	GO:0051084
K200_BP	chaperone cofactor-dependent protein refolding	0.0134001	Zm00001eb240640	GO:0051085
K200_BP	positive regulation of proteasomal protein catabolic process	0.0139027	Zm00001eb240630	GO:1901800
K200_BP	positive regulation of proteolysis involved in cellular protein catabolic process	0.0139027	Zm00001eb240630	GO:1903052
K200_BP	positive regulation of cellular protein catabolic process	0.0139027	Zm00001eb240630	GO:1903364
K200_BP	regulation of proteasomal protein catabolic process	0.0141539	Zm00001eb240630	GO:0061136
K200_BP	regulation of proteolysis involved in cellular protein catabolic process	0.0146563	Zm00001eb240630	GO:1903050
K200_BP	regulation of cellular protein catabolic process	0.0146563	Zm00001eb240630	GO:1903362
K200_BP	positive regulation of protein catabolic process	0.0149073	Zm00001eb240630	GO:0045732
K200_BP	positive regulation of proteolysis	0.0151583	Zm00001eb240630	GO:0045862
K200_BP	'de novo' protein folding	0.0159111	Zm00001eb240640	GO:0006458
K200_BP	regulation of protein catabolic process	0.0186668	Zm00001eb240630	GO:0042176
K200_BP	chaperone-mediated protein folding	0.0206668	Zm00001eb240640	GO:0061077
K200_BP	translational elongation	0.0216867	Zm00001eb027140,Zm00001eb272850	GO:0006414
K200_BP	positive regulation of cellular catabolic process	0.0323466	Zm00001eb240630	GO:0031331
K200_BP	positive regulation of catabolic process	0.033335	Zm00001eb240630	GO:0009896
K200_BP	regulation of proteolysis	0.0392478	Zm00001eb240630	GO:0030162
K200_BP	regulation of cellular catabolic process	0.0397391	Zm00001eb240630	GO:0031329
K200_BP	positive regulation of cellular protein metabolic process	0.0419474	Zm00001eb240630	GO:0032270
K200_BP	positive regulation of protein metabolic process	0.0429275	Zm00001eb240630	GO:0051247
K200_BP	regulation of catabolic process	0.0439067	Zm00001eb240630	GO:0009894
K300_BP	﻿UDP-N-acetylglucosamine metabolic process	0.00362706	Zm00001eb272890	GO:0006047
K300_BP	UDP-N-acetylglucosamine biosynthetic process	0.00362706	Zm00001eb272890	GO:0006048
K300_BP	amino sugar biosynthetic process	0.00362706	Zm00001eb272890	GO:0046349
K300_BP	'de novo' posttranslational protein folding	0.0190889	Zm00001eb240640	GO:0051084
K300_BP	chaperone cofactor-dependent protein refolding	0.0190889	Zm00001eb240640	GO:0051085
K300_BP	amino sugar metabolic process	0.0194459	Zm00001eb272890	GO:0006040
K300_BP	nucleotide-sugar biosynthetic process	0.0198028	Zm00001eb272890	GO:0009226
K300_BP	positive regulation of proteasomal protein catabolic process	0.0198028	Zm00001eb240630	GO:1901800
K300_BP	positive regulation of proteolysis involved in cellular protein catabolic process	0.0198028	Zm00001eb240630	GO:1903052
K300_BP	positive regulation of cellular protein catabolic process	0.0198028	Zm00001eb240630	GO:1903364
K300_BP	regulation of proteasomal protein catabolic process	0.0201595	Zm00001eb240630	GO:0061136
K300_BP	regulation of proteolysis involved in cellular protein catabolic process	0.0208727	Zm00001eb240630	GO:1903050
K300_BP	regulation of cellular protein catabolic process	0.0208727	Zm00001eb240630	GO:1903362
K300_BP	positive regulation of protein catabolic process	0.0212291	Zm00001eb240630	GO:0045732
K300_BP	positive regulation of proteolysis	0.0215854	Zm00001eb240630	GO:0045862
K300_BP	'de novo' protein folding	0.0226536	Zm00001eb240640	GO:0006458
K300_BP	regulation of protein catabolic process	0.0265612	Zm00001eb240630	GO:0042176
K300_BP	nucleotide-sugar metabolic process	0.0269158	Zm00001eb272890	GO:0009225
K300_BP	chaperone-mediated protein folding	0.0293943	Zm00001eb240640	GO:0061077
K300_BP	xenobiotic transport	0.0308081	Zm00001eb272720	GO:0042908
K300_BP	translational elongation	0.0434381	Zm00001eb027140,Zm00001eb272850	GO:0006414
K300_BP	positive regulation of cellular catabolic process	0.0458895	Zm00001eb240630	GO:0031331
K300_BP	positive regulation of catabolic process	0.0472816	Zm00001eb240630	GO:0009896
K300_BP	small molecule metabolic process	0.0495283	Zm00001eb240620,Zm00001eb240650,Zm00001eb272890	GO:0044281
K400_BP	﻿UDP-N-acetylglucosamine metabolic process	0.00471287	Zm00001eb272890	GO:0006047
K400_BP	UDP-N-acetylglucosamine biosynthetic process	0.00471287	Zm00001eb272890	GO:0006048
K400_BP	amino sugar biosynthetic process	0.00471287	Zm00001eb272890	GO:0046349
K400_BP	MAPK cascade	0.0205837	Zm00001eb272710	GO:0000165
K400_BP	'de novo' posttranslational protein folding	0.0247455	Zm00001eb240640	GO:0051084
K400_BP	chaperone cofactor-dependent protein refolding	0.0247455	Zm00001eb240640	GO:0051085
K400_BP	amino sugar metabolic process	0.0252069	Zm00001eb272890	GO:0006040
K400_BP	nucleotide-sugar biosynthetic process	0.0256681	Zm00001eb272890	GO:0009226
K400_BP	positive regulation of proteasomal protein catabolic process	0.0256681	Zm00001eb240630	GO:1901800
K400_BP	positive regulation of proteolysis involved in cellular protein catabolic process	0.0256681	Zm00001eb240630	GO:1903052
K400_BP	positive regulation of cellular protein catabolic process	0.0256681	Zm00001eb240630	GO:1903364
K400_BP	regulation of proteasomal protein catabolic process	0.0261292	Zm00001eb240630	GO:0061136
K400_BP	regulation of proteolysis involved in cellular protein catabolic process	0.0270506	Zm00001eb240630	GO:1903050
K400_BP	regulation of cellular protein catabolic process	0.0270506	Zm00001eb240630	GO:1903362
K400_BP	positive regulation of protein catabolic process	0.027511	Zm00001eb240630	GO:0045732
K400_BP	positive regulation of proteolysis	0.0279712	Zm00001eb240630	GO:0045862
K400_BP	'de novo' protein folding	0.0293506	Zm00001eb240640	GO:0006458
K400_BP	regulation of protein catabolic process	0.034393	Zm00001eb240630	GO:0042176
K400_BP	nucleotide-sugar metabolic process	0.0348502	Zm00001eb272890	GO:0009225
K400_BP	chaperone-mediated protein folding	0.038045	Zm00001eb240640	GO:0061077
K400_BP	xenobiotic transport	0.0398663	Zm00001eb272720	GO:0042908
K500_BP	﻿UDP-N-acetylglucosamine metabolic process	0.00471287	Zm00001eb272890	GO:0006047
K500_BP	UDP-N-acetylglucosamine biosynthetic process	0.00471287	Zm00001eb272890	GO:0006048
K500_BP	amino sugar biosynthetic process	0.00471287	Zm00001eb272890	GO:0046349
K500_BP	MAPK cascade	0.0205837	Zm00001eb272710	GO:0000165
K500_BP	'de novo' posttranslational protein folding	0.0247455	Zm00001eb240640	GO:0051084
K500_BP	chaperone cofactor-dependent protein refolding	0.0247455	Zm00001eb240640	GO:0051085
K500_BP	amino sugar metabolic process	0.0252069	Zm00001eb272890	GO:0006040
K500_BP	nucleotide-sugar biosynthetic process	0.0256681	Zm00001eb272890	GO:0009226
K500_BP	positive regulation of proteasomal protein catabolic process	0.0256681	Zm00001eb240630	GO:1901800
K500_BP	positive regulation of proteolysis involved in cellular protein catabolic process	0.0256681	Zm00001eb240630	GO:1903052
K500_BP	positive regulation of cellular protein catabolic process	0.0256681	Zm00001eb240630	GO:1903364
K500_BP	regulation of proteasomal protein catabolic process	0.0261292	Zm00001eb240630	GO:0061136
K500_BP	regulation of proteolysis involved in cellular protein catabolic process	0.0270506	Zm00001eb240630	GO:1903050
K500_BP	regulation of cellular protein catabolic process	0.0270506	Zm00001eb240630	GO:1903362
K500_BP	positive regulation of protein catabolic process	0.027511	Zm00001eb240630	GO:0045732
K500_BP	positive regulation of proteolysis	0.0279712	Zm00001eb240630	GO:0045862
K500_BP	'de novo' protein folding	0.0293506	Zm00001eb240640	GO:0006458
K500_BP	regulation of protein catabolic process	0.034393	Zm00001eb240630	GO:0042176
K500_BP	nucleotide-sugar metabolic process	0.0348502	Zm00001eb272890	GO:0009225
K500_BP	chaperone-mediated protein folding	0.038045	Zm00001eb240640	GO:0061077
K500_BP	xenobiotic transport	0.0398663	Zm00001eb272720	GO:0042908
K100_CC	﻿cytosolic small ribosomal subunit	0.0126605	Zm00001eb027140	GO:0022627
K100_CC	small ribosomal subunit	0.016023	Zm00001eb027140	GO:0015935
K100_CC	cytosolic ribosome	0.0230352	Zm00001eb027140	GO:0022626
K100_CC	ribosomal subunit	0.0334308	Zm00001eb027140	GO:0044391
K150_CC	﻿ribosome	0.0117111	Zm00001eb027140,Zm00001eb272850	GO:0005840
K150_CC	cytosol	0.0273997	Zm00001eb027140,Zm00001eb240640	GO:0005829
K150_CC	proteasome complex	0.030227	Zm00001eb240630	GO:0000502
K150_CC	cytosolic small ribosomal subunit	0.0313532	Zm00001eb027140	GO:0022627
K150_CC	endopeptidase complex	0.0322909	Zm00001eb240630	GO:1905369
K150_CC	small ribosomal subunit	0.0395798	Zm00001eb027140	GO:0015935
K150_CC	peptidase complex	0.0408834	Zm00001eb240630	GO:1905368
K200_CC	﻿ribosome	0.0117111	Zm00001eb027140,Zm00001eb272850	GO:0005840
K200_CC	cytosol	0.0273997	Zm00001eb027140,Zm00001eb240640	GO:0005829
K200_CC	proteasome complex	0.030227	Zm00001eb240630	GO:0000502
K200_CC	cytosolic small ribosomal subunit	0.0313532	Zm00001eb027140	GO:0022627
K200_CC	endopeptidase complex	0.0322909	Zm00001eb240630	GO:1905369
K200_CC	small ribosomal subunit	0.0395798	Zm00001eb027140	GO:0015935
K200_CC	peptidase complex	0.0408834	Zm00001eb240630	GO:1905368
K300_CC	﻿ribosome	0.0171557	Zm00001eb027140,Zm00001eb272850	GO:0005840
K300_CC	proteasome complex	0.0361626	Zm00001eb240630	GO:0000502
K300_CC	cytosolic small ribosomal subunit	0.0375056	Zm00001eb027140	GO:0022627
K300_CC	endopeptidase complex	0.0386236	Zm00001eb240630	GO:1905369
K300_CC	cytosol	0.0396059	Zm00001eb027140,Zm00001eb240640	GO:0005829
K300_CC	small ribosomal subunit	0.0473066	Zm00001eb027140	GO:0015935
K300_CC	peptidase complex	0.0488582	Zm00001eb240630	GO:1905368
K400_CC	﻿lysosome	0.0222594	Zm00001eb240700	GO:0005764
K400_CC	lytic vacuole	0.0234665	Zm00001eb240700	GO:0000323
K400_CC	ribosome	0.0305499	Zm00001eb027140,Zm00001eb272850	GO:0005840
K400_CC	extracellular region	0.0423763	Zm00001eb240670,Zm00001eb240700	GO:0005576
K400_CC	extracellular space	0.0473355	Zm00001eb240700	GO:0005615
K400_CC	proteasome complex	0.0479256	Zm00001eb240630	GO:0000502
K400_CC	cytosolic small ribosomal subunit	0.0496941	Zm00001eb027140	GO:0022627
K500_CC	﻿lysosome	0.0250073	Zm00001eb240700	GO:0005764
K500_CC	lytic vacuole	0.0263613	Zm00001eb240700	GO:0000323
K500_CC	ribosome	0.038368	Zm00001eb027140,Zm00001eb272850	GO:0005840
K150_MF	﻿proteasome-activating activity	0.00679555	Zm00001eb240630	GO:0036402
K150_MF	structural constituent of ribosome	0.0203304	Zm00001eb027140,Zm00001eb272850	GO:0003735
K150_MF	chaperone binding	0.0269366	Zm00001eb240640	GO:0051087
K150_MF	structural molecule activity	0.0281255	Zm00001eb027140,Zm00001eb272850	GO:0005198
K200_MF	﻿proteasome-activating activity	0.00754788	Zm00001eb240630	GO:0036402
K200_MF	UDP-glycosyltransferase activity	0.0144618	Zm00001eb240520,Zm00001eb240550	GO:0008194
K200_MF	structural constituent of ribosome	0.0249932	Zm00001eb027140,Zm00001eb272850	GO:0003735
K200_MF	transferase activity	0.028052	Zm00001eb240520,Zm00001eb240550,Zm00001eb240580,Zm00001eb240590,Zm00001eb240620,Zm00001eb272800	GO:0016740
K200_MF	chaperone binding	0.0298849	Zm00001eb240640	GO:0051087
K200_MF	structural molecule activity	0.0344679	Zm00001eb027140,Zm00001eb272850	GO:0005198
K300_MF	﻿UDP-N-acetylglucosamine diphosphorylase activity	0.00230271	Zm00001eb272890	GO:0003977
K300_MF	proteasome-activating activity	0.0105517	Zm00001eb240630	GO:0036402
K300_MF	uridylyltransferase activity	0.0123762	Zm00001eb272890	GO:0070569
K300_MF	transferase activity	0.016171	Zm00001eb240520,Zm00001eb240550,Zm00001eb240580,Zm00001eb240590,Zm00001eb240620,Zm00001eb240650,Zm00001eb272800,Zm00001eb272890	GO:0016740
K300_MF	ubiquitin binding	0.0259607	Zm00001eb272740	GO:0043130
K300_MF	ubiquitin-like protein binding	0.0273096	Zm00001eb272740	GO:0032182
K300_MF	UDP-glycosyltransferase activity	0.0278273	Zm00001eb240520,Zm00001eb240550	GO:0008194
K300_MF	xenobiotic transmembrane transporter activity	0.0389273	Zm00001eb272720	GO:0042910
K300_MF	chaperone binding	0.0415899	Zm00001eb240640	GO:0051087
K300_MF	structural constituent of ribosome	0.0473012	Zm00001eb027140,Zm00001eb272850	GO:0003735
K400_MF	﻿UDP-N-acetylglucosamine diphosphorylase activity	0.00312407	Zm00001eb272890	GO:0003977
K400_MF	transferase activity	0.00423594	Zm00001eb240490,Zm00001eb240500,Zm00001eb240520,Zm00001eb240550,Zm00001eb240580,Zm00001eb240590,Zm00001eb240620,Zm00001eb240650,Zm00001eb272710,Zm00001eb272800,Zm00001eb272890	GO:0016740
K400_MF	proteasome-activating activity	0.0142943	Zm00001eb240630	GO:0036402
K400_MF	uridylyltransferase activity	0.0167605	Zm00001eb272890	GO:0070569
K400_MF	MAP kinase activity	0.0259565	Zm00001eb272710	GO:0004707
K400_MF	ubiquitin binding	0.035071	Zm00001eb272740	GO:0043130
K400_MF	ubiquitin-like protein binding	0.0368842	Zm00001eb272740	GO:0032182
K400_MF	UDP-glycosyltransferase activity	0.0491642	Zm00001eb240520,Zm00001eb240550	GO:0008194
K500_MF	﻿UDP-N-acetylglucosamine diphosphorylase activity	0.00312407	Zm00001eb272890	GO:0003977
K500_MF	transferase activity	0.00423594	Zm00001eb240490,Zm00001eb240500,Zm00001eb240520,Zm00001eb240550,Zm00001eb240580,Zm00001eb240590,Zm00001eb240620,Zm00001eb240650,Zm00001eb272710,Zm00001eb272800,Zm00001eb272890	GO:0016740
K500_MF	proteasome-activating activity	0.0142943	Zm00001eb240630	GO:0036402
K500_MF	uridylyltransferase activity	0.0167605	Zm00001eb272890	GO:0070569
K500_MF	MAP kinase activity	0.0259565	Zm00001eb272710	GO:0004707
K500_MF	ubiquitin binding	0.035071	Zm00001eb272740	GO:0043130
K500_MF	ubiquitin-like protein binding	0.0368842	Zm00001eb272740	GO:0032182
K500_MF	UDP-glycosyltransferase activity	0.0491642	Zm00001eb240520,Zm00001eb240550	GO:0008194
