# Supplementary material for: Archaeological Bolivian maize genomes suggest diversity is associated with Inca cultural expansion and environmental variation in South America
Source: Research Square preprint supplement (doi:10.21203/rs.3.rs-2592230/v1), 2023-03-03
Supplement: Supplementary file 4 [file 7089b2e77e5a4a22a041aa40.xlsx]

## Sheet: Supplementary Data Set 4
Supplementary DataSet 4. Gene Ontology Enrichment of BM_vs_ancientChile at different distance cutoff.
BM_vs_ancientChile						Abbreviation	Name
K10_BP	﻿protein homooligomerization	0.00116205	Zm00001eb425960	GO:0051260		BP	Biological Process
K10_BP	mitotic sister chromatid cohesion	0.00167024	Zm00001eb425970	GO:0007064		CC	Cellular Componen
K10_BP	sister chromatid cohesion	0.00391922	Zm00001eb425970	GO:0007062		MF	Molecular Function
K10_BP	protein complex oligomerization	0.0044267	Zm00001eb425960	GO:0051259		K10	10 KB
K10_BP	mitotic sister chromatid segregation	0.00507899	Zm00001eb425970	GO:0000070		K50	50 KB
K10_BP	sister chromatid segregation	0.00797546	Zm00001eb425970	GO:0000819		K100	100 KB
K10_BP	nuclear chromosome segregation	0.0100728	Zm00001eb425970	GO:0098813		K150	150 KB
K10_BP	mitotic nuclear division	0.0104341	Zm00001eb425970	GO:0140014		K200	200 KB
K10_BP	chromosome segregation	0.0110122	Zm00001eb425970	GO:0007059		K300	300 KB
K10_BP	cellular component organization	0.0137022	Zm00001eb425960,Zm00001eb425970	GO:0016043		K400	400 KB
K10_BP	cellular component organization or biogenesis	0.0183332	Zm00001eb425960,Zm00001eb425970	GO:0071840		K500	500 KB
K10_BP	nuclear division	0.0203103	Zm00001eb425970	GO:0000280
K10_BP	mitotic cell cycle process	0.0233999	Zm00001eb425970	GO:1903047
K10_BP	mitotic cell cycle	0.0234717	Zm00001eb425970	GO:0000278
K10_BP	organelle fission	0.0241177	Zm00001eb425970	GO:0048285
K10_BP	cell division	0.0249787	Zm00001eb425970	GO:0051301
K10_BP	cell cycle process	0.039202	Zm00001eb425970	GO:0022402
K10_BP	cell cycle	0.0485788	Zm00001eb425970	GO:0007049
K50_BP	﻿protein homooligomerization	0.0017426	Zm00001eb425960	GO:0051260
K50_BP	mitotic sister chromatid cohesion	0.00250435	Zm00001eb425970	GO:0007064
K50_BP	sister chromatid cohesion	0.00587317	Zm00001eb425970	GO:0007062
K50_BP	protein complex oligomerization	0.00663282	Zm00001eb425960	GO:0051259
K50_BP	mitotic sister chromatid segregation	0.00760894	Zm00001eb425970	GO:0000070
K50_BP	sister chromatid segregation	0.0119395	Zm00001eb425970	GO:0000819
K50_BP	nuclear chromosome segregation	0.0150713	Zm00001eb425970	GO:0098813
K50_BP	mitotic nuclear division	0.0156106	Zm00001eb425970	GO:0140014
K50_BP	chromosome segregation	0.0164731	Zm00001eb425970	GO:0007059
K50_BP	nuclear division	0.0303107	Zm00001eb425970	GO:0000280
K50_BP	mitotic cell cycle process	0.0348943	Zm00001eb425970	GO:1903047
K50_BP	mitotic cell cycle	0.0350007	Zm00001eb425970	GO:0000278
K50_BP	organelle fission	0.0359582	Zm00001eb425970	GO:0048285
K50_BP	cell division	0.0372338	Zm00001eb425970	GO:0051301
K50_BP	cellular component organization	0.0379	Zm00001eb425960,Zm00001eb425970	GO:0016043
K100_BP	﻿protein homooligomerization	0.00348236	Zm00001eb425960	GO:0051260
K100_BP	mitotic sister chromatid cohesion	0.00500271	Zm00001eb425970	GO:0007064
K100_BP	sister chromatid cohesion	0.0117125	Zm00001eb425970	GO:0007062
K100_BP	protein complex oligomerization	0.0132224	Zm00001eb425960	GO:0051259
K100_BP	mitotic sister chromatid segregation	0.0151608	Zm00001eb425970	GO:0000070
K100_BP	sister chromatid segregation	0.0237378	Zm00001eb425970	GO:0000819
K100_BP	nuclear chromosome segregation	0.0299171	Zm00001eb425970	GO:0098813
K100_BP	mitotic nuclear division	0.0309792	Zm00001eb425970	GO:0140014
K100_BP	chromosome segregation	0.0326765	Zm00001eb425970	GO:0007059
K150_BP	﻿phosphatidylglycerol biosynthetic process	0.002359	Zm00001eb150880	GO:0006655
K150_BP	phosphatidylglycerol metabolic process	0.002359	Zm00001eb150880	GO:0046471
K150_BP	protein homooligomerization	0.00753074	Zm00001eb425960	GO:0051260
K150_BP	cold acclimation	0.00799967	Zm00001eb097360	GO:0009631
K150_BP	positive regulation of cell population proliferation	0.00846839	Zm00001eb097360	GO:0008284
K150_BP	microtubule nucleation	0.0103412	Zm00001eb425980	GO:0007020
K150_BP	mitotic sister chromatid cohesion	0.0108089	Zm00001eb425970	GO:0007064
K150_BP	microtubule polymerization	0.0112764	Zm00001eb425980	GO:0046785
K150_BP	regulation of cell population proliferation	0.0140772	Zm00001eb097360	GO:0042127
K150_BP	plastid membrane organization	0.0145432	Zm00001eb150880	GO:0009668
K150_BP	thylakoid membrane organization	0.0145432	Zm00001eb150880	GO:0010027
K150_BP	microtubule polymerization or depolymerization	0.0150091	Zm00001eb425980	GO:0031109
K150_BP	systemic acquired resistance	0.0205837	Zm00001eb097360	GO:0009627
K150_BP	base-excision repair	0.0224354	Zm00001eb425930	GO:0006284
K150_BP	cell population proliferation	0.0238221	Zm00001eb097360	GO:0008283
K150_BP	sister chromatid cohesion	0.0252069	Zm00001eb425970	GO:0007062
K150_BP	cellular biosynthetic process	0.0262422	Zm00001eb027140,Zm00001eb097360,Zm00001eb150880,Zm00001eb183190,Zm00001eb183200,Zm00001eb240620,Zm00001eb272850	GO:0044249
K150_BP	protein complex oligomerization	0.0284312	Zm00001eb425960	GO:0051259
K150_BP	organic substance biosynthetic process	0.0301789	Zm00001eb027140,Zm00001eb097360,Zm00001eb150880,Zm00001eb183190,Zm00001eb183200,Zm00001eb240620,Zm00001eb272850	GO:1901576
K150_BP	mitotic sister chromatid segregation	0.0325622	Zm00001eb425970	GO:0000070
K150_BP	phospholipid dephosphorylation	0.0330202	Zm00001eb150880	GO:0046839
K150_BP	biosynthetic process	0.0351021	Zm00001eb027140,Zm00001eb097360,Zm00001eb150880,Zm00001eb183190,Zm00001eb183200,Zm00001eb240620,Zm00001eb272850	GO:0009058
K150_BP	transcription by RNA polymerase II	0.0364439	Zm00001eb097360,Zm00001eb183200	GO:0006366
K150_BP	protein polymerization	0.0371332	Zm00001eb425980	GO:0051258
K150_BP	regulation of transcription by RNA polymerase II	0.0452488	Zm00001eb097360,Zm00001eb183200	GO:0006357
K150_BP	protein-containing complex assembly	0.0468258	Zm00001eb425960,Zm00001eb425980	GO:0065003
K150_BP	root system development	0.0498262	Zm00001eb150880	GO:0022622
K200_BP	﻿phosphatidylglycerol biosynthetic process	0.00380848	Zm00001eb150880	GO:0006655
K200_BP	phosphatidylglycerol metabolic process	0.00380848	Zm00001eb150880	GO:0046471
K200_BP	cellular response to nitrate	0.00608694	Zm00001eb425910	GO:0071249
K200_BP	cellular response to reactive nitrogen species	0.00760315	Zm00001eb425910	GO:1902170
K200_BP	mitochondrial calcium ion transmembrane transport	0.00987334	Zm00001eb426050	GO:0006851
K200_BP	cellular response to nitrogen compound	0.010629	Zm00001eb425910	GO:1901699
K200_BP	transposition	0.011384	Zm00001eb129880	GO:0032196
K200_BP	protein homooligomerization	0.0121386	Zm00001eb425960	GO:0051260
K200_BP	cold acclimation	0.0128926	Zm00001eb097360	GO:0009631
K200_BP	positive regulation of cell population proliferation	0.013646	Zm00001eb097360	GO:0008284
K200_BP	cellular response to inorganic substance	0.015903	Zm00001eb425910	GO:0071241
K200_BP	microtubule nucleation	0.0166543	Zm00001eb425980	GO:0007020
K200_BP	mitotic sister chromatid cohesion	0.017405	Zm00001eb425970	GO:0007064
K200_BP	response to nitrate	0.017405	Zm00001eb425910	GO:0010167
K200_BP	nitrate transport	0.0181551	Zm00001eb425910	GO:0015706
K200_BP	microtubule polymerization	0.0181551	Zm00001eb425980	GO:0046785
K200_BP	regulation of cell population proliferation	0.0226446	Zm00001eb097360	GO:0042127
K200_BP	plastid membrane organization	0.0233909	Zm00001eb150880	GO:0009668
K200_BP	thylakoid membrane organization	0.0233909	Zm00001eb150880	GO:0010027
K200_BP	microtubule polymerization or depolymerization	0.0241367	Zm00001eb425980	GO:0031109
K200_BP	positive regulation of cellular process	0.027047	Zm00001eb097360,Zm00001eb183200,Zm00001eb240630	GO:0048522
K200_BP	systemic acquired resistance	0.0330442	Zm00001eb097360	GO:0009627
K200_BP	translational elongation	0.0331027	Zm00001eb027140,Zm00001eb272850,Zm00001eb425920	GO:0006414
K200_BP	base-excision repair	0.0359961	Zm00001eb425930	GO:0006284
K200_BP	positive regulation of biological process	0.037188	Zm00001eb097360,Zm00001eb183200,Zm00001eb240630	GO:0048518
K200_BP	cell population proliferation	0.0382043	Zm00001eb097360	GO:0008283
K200_BP	sister chromatid cohesion	0.0404078	Zm00001eb425970	GO:0007062
K200_BP	positive regulation of proteasomal protein catabolic process	0.0411412	Zm00001eb240630	GO:1901800
K200_BP	positive regulation of proteolysis involved in cellular protein catabolic process	0.0411412	Zm00001eb240630	GO:1903052
K200_BP	positive regulation of cellular protein catabolic process	0.0411412	Zm00001eb240630	GO:1903364
K200_BP	regulation of proteasomal protein catabolic process	0.0418741	Zm00001eb240630	GO:0061136
K200_BP	regulation of proteolysis involved in cellular protein catabolic process	0.0433383	Zm00001eb240630	GO:1903050
K200_BP	regulation of cellular protein catabolic process	0.0433383	Zm00001eb240630	GO:1903362
K200_BP	positive regulation of protein catabolic process	0.0440696	Zm00001eb240630	GO:0045732
K200_BP	positive regulation of proteolysis	0.0448003	Zm00001eb240630	GO:0045862
K200_BP	protein complex oligomerization	0.0455305	Zm00001eb425960	GO:0051259
K300_BP	﻿regulation of cell population proliferation	0.00048997	Zm00001eb097360,Zm00001eb183220	GO:0042127
K300_BP	cell population proliferation	0.00141585	Zm00001eb097360,Zm00001eb183220	GO:0008283
K300_BP	negative regulation of cell population proliferation	0.004352	Zm00001eb183220	GO:0008285
K300_BP	phosphatidylglycerol biosynthetic process	0.00543713	Zm00001eb150880	GO:0006655
K300_BP	phosphatidylglycerol metabolic process	0.00543713	Zm00001eb150880	GO:0046471
K300_BP	cellular response to nitrate	0.00868569	Zm00001eb425910	GO:0071249
K300_BP	UDP-N-acetylglucosamine metabolic process	0.0108457	Zm00001eb272890	GO:0006047
K300_BP	UDP-N-acetylglucosamine biosynthetic process	0.0108457	Zm00001eb272890	GO:0006048
K300_BP	amino sugar biosynthetic process	0.0108457	Zm00001eb272890	GO:0046349
K300_BP	cellular response to reactive nitrogen species	0.0108457	Zm00001eb425910	GO:1902170
K300_BP	mitochondrial calcium ion transmembrane transport	0.0140772	Zm00001eb426050	GO:0006851
K300_BP	cellular response to nitrogen compound	0.015152	Zm00001eb425910	GO:1901699
K300_BP	transposition	0.0162258	Zm00001eb129880	GO:0032196
K300_BP	protein homooligomerization	0.0172984	Zm00001eb425960	GO:0051260
K300_BP	cold acclimation	0.0183699	Zm00001eb097360	GO:0009631
K300_BP	positive regulation of cell population proliferation	0.0194403	Zm00001eb097360	GO:0008284
K300_BP	cellular response to inorganic substance	0.0226446	Zm00001eb425910	GO:0071241
K300_BP	microtubule nucleation	0.0237105	Zm00001eb425980	GO:0007020
K300_BP	mitotic sister chromatid cohesion	0.0247752	Zm00001eb425970	GO:0007064
K300_BP	response to nitrate	0.0247752	Zm00001eb425910	GO:0010167
K300_BP	nitrate transport	0.0258388	Zm00001eb425910	GO:0015706
K300_BP	microtubule polymerization	0.0258388	Zm00001eb425980	GO:0046785
K300_BP	plastid membrane organization	0.0332527	Zm00001eb150880	GO:0009668
K300_BP	thylakoid membrane organization	0.0332527	Zm00001eb150880	GO:0010027
K300_BP	microtubule polymerization or depolymerization	0.0343074	Zm00001eb425980	GO:0031109
K300_BP	protein import into mitochondrial matrix	0.041659	Zm00001eb097390	GO:0030150
K300_BP	systemic acquired resistance	0.046877	Zm00001eb097360	GO:0009627
K400_BP	﻿regulation of cell population proliferation	0.000829568	Zm00001eb097360,Zm00001eb183220	GO:0042127
K400_BP	cell population proliferation	0.00238629	Zm00001eb097360,Zm00001eb183220	GO:0008283
K400_BP	Lewis a epitope biosynthetic process	0.00424405	Zm00001eb183150	GO:0010493
K400_BP	hydrogen peroxide catabolic process	0.00519615	Zm00001eb129890,Zm00001eb129900,Zm00001eb240670	GO:0042744
K400_BP	hydrogen peroxide metabolic process	0.00555163	Zm00001eb129890,Zm00001eb129900,Zm00001eb240670	GO:0042743
K400_BP	negative regulation of cell population proliferation	0.00565482	Zm00001eb183220	GO:0008285
K400_BP	phosphatidylglycerol biosynthetic process	0.00706365	Zm00001eb150880	GO:0006655
K400_BP	phosphatidylglycerol metabolic process	0.00706365	Zm00001eb150880	GO:0046471
K400_BP	reactive oxygen species metabolic process	0.0085272	Zm00001eb129890,Zm00001eb129900,Zm00001eb240670	GO:0072593
K400_BP	cellular response to nitrate	0.0112785	Zm00001eb425910	GO:0071249
K400_BP	UDP-N-acetylglucosamine metabolic process	0.0140787	Zm00001eb272890	GO:0006047
K400_BP	UDP-N-acetylglucosamine biosynthetic process	0.0140787	Zm00001eb272890	GO:0006048
K400_BP	amino sugar biosynthetic process	0.0140787	Zm00001eb272890	GO:0046349
K400_BP	cellular response to reactive nitrogen species	0.0140787	Zm00001eb425910	GO:1902170
K400_BP	mitochondrial calcium ion transmembrane transport	0.0182645	Zm00001eb426050	GO:0006851
K400_BP	cellular oxidant detoxification	0.0195297	Zm00001eb129890,Zm00001eb129900,Zm00001eb240670	GO:0098869
K400_BP	cellular response to nitrogen compound	0.0196559	Zm00001eb425910	GO:1901699
K400_BP	transposition	0.0210454	Zm00001eb129880	GO:0032196
K400_BP	cellular response to toxic substance	0.0210767	Zm00001eb129890,Zm00001eb129900,Zm00001eb240670	GO:0097237
K400_BP	cellular detoxification	0.0210767	Zm00001eb129890,Zm00001eb129900,Zm00001eb240670	GO:1990748
K400_BP	detoxification	0.0213409	Zm00001eb129890,Zm00001eb129900,Zm00001eb240670	GO:0098754
K400_BP	protein homooligomerization	0.022433	Zm00001eb425960	GO:0051260
K400_BP	cold acclimation	0.0238187	Zm00001eb097360	GO:0009631
K400_BP	response to toxic substance	0.0239427	Zm00001eb129890,Zm00001eb129900,Zm00001eb240670	GO:0009636
K400_BP	chloroplast organization	0.024454	Zm00001eb150880,Zm00001eb183160	GO:0009658
K400_BP	positive regulation of cell population proliferation	0.0252024	Zm00001eb097360	GO:0008284
K400_BP	response to oxidative stress	0.0291688	Zm00001eb129890,Zm00001eb129900,Zm00001eb240670	GO:0006979
K400_BP	cellular response to inorganic substance	0.0293422	Zm00001eb425910	GO:0071241
K400_BP	microtubule nucleation	0.0307183	Zm00001eb425980	GO:0007020
K400_BP	mitotic sister chromatid cohesion	0.0320925	Zm00001eb425970	GO:0007064
K400_BP	response to nitrate	0.0320925	Zm00001eb425910	GO:0010167
K400_BP	nitrate transport	0.0334648	Zm00001eb425910	GO:0015706
K400_BP	microtubule polymerization	0.0334648	Zm00001eb425980	GO:0046785
K400_BP	plastid organization	0.0372318	Zm00001eb150880,Zm00001eb183160	GO:0009657
K400_BP	plastid membrane organization	0.0430181	Zm00001eb150880	GO:0009668
K400_BP	thylakoid membrane organization	0.0430181	Zm00001eb150880	GO:0010027
K400_BP	cellular process	0.0438097	Zm00001eb027140,Zm00001eb097360,Zm00001eb097390,Zm00001eb097400,Zm00001eb129820,Zm00001eb129840,Zm00001eb129880,Zm00001eb129890,Zm00001eb129900,Zm00001eb150820,Zm00001eb150880,Zm00001eb183150,Zm00001eb183160,Zm00001eb183170,Zm00001eb183190,Zm00001eb183200,Zm00001eb183220,Zm00001eb240620,Zm00001eb240640,Zm00001eb240650,Zm00001eb240670,Zm00001eb272710,Zm00001eb272720,Zm00001eb272800,Zm00001eb272850…	GO:0009987
K400_BP	microtubule polymerization or depolymerization	0.0443754	Zm00001eb425980	GO:0031109
K500_BP	﻿hydrogen peroxide catabolic process	0.000845853	Zm00001eb129890,Zm00001eb129900,Zm00001eb129910,Zm00001eb240670	GO:0042744
K500_BP	hydrogen peroxide metabolic process	0.000924346	Zm00001eb129890,Zm00001eb129900,Zm00001eb129910,Zm00001eb240670	GO:0042743
K500_BP	regulation of cell population proliferation	0.00120367	Zm00001eb097360,Zm00001eb183220	GO:0042127
K500_BP	reactive oxygen species metabolic process	0.00164372	Zm00001eb129890,Zm00001eb129900,Zm00001eb129910,Zm00001eb240670	GO:0072593
K500_BP	base-excision repair	0.00306083	Zm00001eb150740,Zm00001eb425930	GO:0006284
K500_BP	cell population proliferation	0.00344847	Zm00001eb097360,Zm00001eb183220	GO:0008283
K500_BP	cellular oxidant detoxification	0.00499853	Zm00001eb129890,Zm00001eb129900,Zm00001eb129910,Zm00001eb240670	GO:0098869
K500_BP	Lewis a epitope biosynthetic process	0.00511313	Zm00001eb183150	GO:0010493
K500_BP	cellular response to toxic substance	0.00553739	Zm00001eb129890,Zm00001eb129900,Zm00001eb129910,Zm00001eb240670	GO:0097237
K500_BP	cellular detoxification	0.00553739	Zm00001eb129890,Zm00001eb129900,Zm00001eb129910,Zm00001eb240670	GO:1990748
K500_BP	detoxification	0.00563083	Zm00001eb129890,Zm00001eb129900,Zm00001eb129910,Zm00001eb240670	GO:0098754
K500_BP	response to toxic substance	0.00657175	Zm00001eb129890,Zm00001eb129900,Zm00001eb129910,Zm00001eb240670	GO:0009636
K500_BP	negative regulation of cell population proliferation	0.00681182	Zm00001eb183220	GO:0008285
K500_BP	protein polymerization	0.00828259	Zm00001eb150940,Zm00001eb425980	GO:0051258
K500_BP	phosphatidylglycerol biosynthetic process	0.00850766	Zm00001eb150880	GO:0006655
K500_BP	phosphatidylglycerol metabolic process	0.00850766	Zm00001eb150880	GO:0046471
K500_BP	response to oxidative stress	0.00856825	Zm00001eb129890,Zm00001eb129900,Zm00001eb129910,Zm00001eb240670	GO:0006979
K500_BP	cellular response to stimulus	0.0104399	Zm00001eb097290,Zm00001eb129820,Zm00001eb129890,Zm00001eb129900,Zm00001eb129910,Zm00001eb150740,Zm00001eb240670,Zm00001eb272710,Zm00001eb425910,Zm00001eb425930	GO:0051716
K500_BP	cellular response to nitrate	0.0135782	Zm00001eb425910	GO:0071249
K500_BP	UDP-N-acetylglucosamine metabolic process	0.0169445	Zm00001eb272890	GO:0006047
K500_BP	UDP-N-acetylglucosamine biosynthetic process	0.0169445	Zm00001eb272890	GO:0006048
K500_BP	amino sugar biosynthetic process	0.0169445	Zm00001eb272890	GO:0046349
K500_BP	cellular response to reactive nitrogen species	0.0169445	Zm00001eb425910	GO:1902170
K500_BP	response to stimulus	0.0205866	Zm00001eb097290,Zm00001eb097360,Zm00001eb129820,Zm00001eb129890,Zm00001eb129900,Zm00001eb129910,Zm00001eb150720,Zm00001eb150740,Zm00001eb240670,Zm00001eb272710,Zm00001eb272840,Zm00001eb425910,Zm00001eb425930	GO:0050896
K500_BP	mitochondrial calcium ion transmembrane transport	0.0219728	Zm00001eb426050	GO:0006851
K500_BP	cellular response to nitrogen compound	0.0236433	Zm00001eb425910	GO:1901699
K500_BP	response to chemical	0.0239831	Zm00001eb129890,Zm00001eb129900,Zm00001eb129910,Zm00001eb150720,Zm00001eb240670,Zm00001eb272840,Zm00001eb425910	GO:0042221
K500_BP	transposition	0.025311	Zm00001eb129880	GO:0032196
K500_BP	protein homooligomerization	0.0269759	Zm00001eb425960	GO:0051260
K500_BP	cold acclimation	0.0286381	Zm00001eb097360	GO:0009631
K500_BP	positive regulation of cell population proliferation	0.0302974	Zm00001eb097360	GO:0008284
K500_BP	chloroplast organization	0.0345458	Zm00001eb150880,Zm00001eb183160	GO:0009658
K500_BP	cellular response to inorganic substance	0.0352589	Zm00001eb425910	GO:0071241
K500_BP	cellular response to chemical stimulus	0.0363765	Zm00001eb129890,Zm00001eb129900,Zm00001eb129910,Zm00001eb240670,Zm00001eb425910	GO:0070887
K500_BP	microtubule nucleation	0.0369072	Zm00001eb425980	GO:0007020
K500_BP	mitotic sister chromatid cohesion	0.0385527	Zm00001eb425970	GO:0007064
K500_BP	response to nitrate	0.0385527	Zm00001eb425910	GO:0010167
K500_BP	cellular process	0.0392508	Zm00001eb027140,Zm00001eb097290,Zm00001eb097360,Zm00001eb097390,Zm00001eb097400,Zm00001eb129820,Zm00001eb129840,Zm00001eb129880,Zm00001eb129890,Zm00001eb129900,Zm00001eb129910,Zm00001eb150720,Zm00001eb150740,Zm00001eb150820,Zm00001eb150880,Zm00001eb150940,Zm00001eb183150,Zm00001eb183160,Zm00001eb183170,Zm00001eb183190,Zm00001eb183200,Zm00001eb183220,Zm00001eb240620,Zm00001eb240640,Zm00001eb240650…	GO:0009987
K500_BP	nitrate transport	0.0401955	Zm00001eb425910	GO:0015706
K500_BP	microtubule polymerization	0.0401955	Zm00001eb425980	GO:0046785
K500_BP	positive regulation of actin filament polymerization	0.0418355	Zm00001eb150940	GO:0030838
K500_BP	Arp2/3 complex-mediated actin nucleation	0.0418355	Zm00001eb150940	GO:0034314
K500_BP	actin nucleation	0.0418355	Zm00001eb150940	GO:0045010
K500_BP	supramolecular fiber organization	0.042613	Zm00001eb150940,Zm00001eb425980	GO:0097435
K500_BP	positive regulation of protein polymerization	0.0451074	Zm00001eb150940	GO:0032273
K500_BP	positive regulation of protein-containing complex assembly	0.0483683	Zm00001eb150940	GO:0031334
K500_BP	positive regulation of cellular component biogenesis	0.0499947	Zm00001eb150940	GO:0044089
K100_CC	﻿cytosolic small ribosomal subunit	0.0189309	Zm00001eb027140	GO:0022627
K100_CC	small ribosomal subunit	0.0239385	Zm00001eb027140	GO:0015935
K100_CC	cytosolic ribosome	0.0343538	Zm00001eb027140	GO:0022626
K100_CC	ribosomal subunit	0.0497257	Zm00001eb027140	GO:0044391
K150_CC	﻿spindle pole	0.00575903	Zm00001eb425980	GO:0000922
K150_CC	microtubule organizing center	0.0133913	Zm00001eb425980	GO:0005815
K150_CC	mediator complex	0.0258693	Zm00001eb097360	GO:0016592
K150_CC	core mediator complex	0.0258693	Zm00001eb097360	GO:0070847
K150_CC	spindle	0.0296224	Zm00001eb425980	GO:0005819
K150_CC	ribosome	0.0468519	Zm00001eb027140,Zm00001eb272850	GO:0005840
K200_CC	﻿spindle pole	0.00862692	Zm00001eb425980	GO:0000922
K200_CC	ribosome	0.0147254	Zm00001eb027140,Zm00001eb272850,Zm00001eb425920	GO:0005840
K200_CC	cell-cell junction	0.017012	Zm00001eb097360,Zm00001eb129890	GO:0005911
K200_CC	plasmodesma	0.017012	Zm00001eb097360,Zm00001eb129890	GO:0009506
K200_CC	symplast	0.017012	Zm00001eb097360,Zm00001eb129890	GO:0055044
K200_CC	anchoring junction	0.017012	Zm00001eb097360,Zm00001eb129890	GO:0070161
K200_CC	cell junction	0.0171952	Zm00001eb097360,Zm00001eb129890	GO:0030054
K200_CC	microtubule organizing center	0.0200214	Zm00001eb425980	GO:0005815
K200_CC	plant-type vacuole membrane	0.0379988	Zm00001eb425910	GO:0009705
K200_CC	mediator complex	0.0385556	Zm00001eb097360	GO:0016592
K200_CC	core mediator complex	0.0385556	Zm00001eb097360	GO:0070847
K200_CC	spindle	0.044107	Zm00001eb425980	GO:0005819
K200_CC	plant-type vacuole	0.0463192	Zm00001eb425910	GO:0000325
K300_CC	﻿PAM complex, Tim23 associated import motor	0.00767206	Zm00001eb097390	GO:0001405
K300_CC	spindle pole	0.0114871	Zm00001eb425980	GO:0000922
K300_CC	TIM23 mitochondrial import inner membrane translocase complex	0.0175622	Zm00001eb097390	GO:0005744
K300_CC	microtubule organizing center	0.0266083	Zm00001eb425980	GO:0005815
K300_CC	cell-cell junction	0.0294519	Zm00001eb097360,Zm00001eb129890	GO:0005911
K300_CC	plasmodesma	0.0294519	Zm00001eb097360,Zm00001eb129890	GO:0009506
K300_CC	symplast	0.0294519	Zm00001eb097360,Zm00001eb129890	GO:0055044
K300_CC	anchoring junction	0.0294519	Zm00001eb097360,Zm00001eb129890	GO:0070161
K300_CC	CCR4-NOT core complex	0.0296061	Zm00001eb129840	GO:0030015
K300_CC	cell junction	0.0297618	Zm00001eb097360,Zm00001eb129890	GO:0030054
K300_CC	ribosome	0.0323678	Zm00001eb027140,Zm00001eb272850,Zm00001eb425920	GO:0005840
K300_CC	CCR4-NOT complex	0.0444638	Zm00001eb129840	GO:0030014
K400_CC	﻿cell-cell junction	0.00562169	Zm00001eb097360,Zm00001eb129890,Zm00001eb129900	GO:0005911
K400_CC	plasmodesma	0.00562169	Zm00001eb097360,Zm00001eb129890,Zm00001eb129900	GO:0009506
K400_CC	symplast	0.00562169	Zm00001eb097360,Zm00001eb129890,Zm00001eb129900	GO:0055044
K400_CC	anchoring junction	0.00562169	Zm00001eb097360,Zm00001eb129890,Zm00001eb129900	GO:0070161
K400_CC	cell junction	0.00571074	Zm00001eb097360,Zm00001eb129890,Zm00001eb129900	GO:0030054
K400_CC	Piccolo NuA4 histone acetyltransferase complex	0.00931492	Zm00001eb097400	GO:0032777
K400_CC	PAM complex, Tim23 associated import motor	0.0103447	Zm00001eb097390	GO:0001405
K400_CC	plant-type cell wall	0.010979	Zm00001eb129890,Zm00001eb129900	GO:0009505
K400_CC	spindle pole	0.0154784	Zm00001eb425980	GO:0000922
K400_CC	NuA4 histone acetyltransferase complex	0.016502	Zm00001eb097400	GO:0035267
K400_CC	H4/H2A histone acetyltransferase complex	0.0175247	Zm00001eb097400	GO:0043189
K400_CC	H4 histone acetyltransferase complex	0.0205864	Zm00001eb097400	GO:1902562
K400_CC	TIM23 mitochondrial import inner membrane translocase complex	0.0236389	Zm00001eb097390	GO:0005744
K400_CC	microtubule organizing center	0.0357577	Zm00001eb425980	GO:0005815
K400_CC	CCR4-NOT core complex	0.039765	Zm00001eb129840	GO:0030015
K400_CC	photosystem II oxygen evolving complex	0.04276	Zm00001eb183170	GO:0009654
K400_CC	intracellular protein-containing complex	0.0478139	Zm00001eb097400,Zm00001eb129840,Zm00001eb240630	GO:0140535
K500_CC	﻿plant-type cell wall	0.00104783	Zm00001eb129890,Zm00001eb129900,Zm00001eb129910	GO:0009505
K500_CC	cell-cell junction	0.00110235	Zm00001eb097360,Zm00001eb129890,Zm00001eb129900,Zm00001eb129910	GO:0005911
K500_CC	plasmodesma	0.00110235	Zm00001eb097360,Zm00001eb129890,Zm00001eb129900,Zm00001eb129910	GO:0009506
K500_CC	symplast	0.00110235	Zm00001eb097360,Zm00001eb129890,Zm00001eb129900,Zm00001eb129910	GO:0055044
K500_CC	anchoring junction	0.00110235	Zm00001eb097360,Zm00001eb129890,Zm00001eb129900,Zm00001eb129910	GO:0070161
K500_CC	cell junction	0.00112573	Zm00001eb097360,Zm00001eb129890,Zm00001eb129900,Zm00001eb129910	GO:0030054
K500_CC	Piccolo NuA4 histone acetyltransferase complex	0.0117173	Zm00001eb097400	GO:0032777
K500_CC	PAM complex, Tim23 associated import motor	0.0130109	Zm00001eb097390	GO:0001405
K500_CC	extracellular region	0.0135619	Zm00001eb129890,Zm00001eb129900,Zm00001eb129910,Zm00001eb240670,Zm00001eb240700	GO:0005576
K500_CC	intracellular protein-containing complex	0.0191583	Zm00001eb097290,Zm00001eb097400,Zm00001eb129840,Zm00001eb240630	GO:0140535
K500_CC	spindle pole	0.0194546	Zm00001eb425980	GO:0000922
K500_CC	NuA4 histone acetyltransferase complex	0.0207385	Zm00001eb097400	GO:0035267
K500_CC	H4/H2A histone acetyltransferase complex	0.0220207	Zm00001eb097400	GO:0043189
K500_CC	Arp2/3 protein complex	0.0233012	Zm00001eb150940	GO:0005885
K500_CC	cell wall	0.0248075	Zm00001eb129890,Zm00001eb129900,Zm00001eb129910	GO:0005618
K500_CC	external encapsulating structure	0.0256118	Zm00001eb129890,Zm00001eb129900,Zm00001eb129910	GO:0030312
K500_CC	H4 histone acetyltransferase complex	0.0258575	Zm00001eb097400	GO:1902562
K500_CC	TIM23 mitochondrial import inner membrane translocase complex	0.0296797	Zm00001eb097390	GO:0005744
K500_CC	microtubule organizing center	0.0448236	Zm00001eb425980	GO:0005815
K500_CC	CCR4-NOT core complex	0.0498203	Zm00001eb129840	GO:0030015
K150_MF	﻿phosphatidylglycerophosphatase activity	0.000460936	Zm00001eb150880	GO:0008962
K150_MF	gamma-tubulin binding	0.00460049	Zm00001eb425980	GO:0043015
K150_MF	DNA-3-methyladenine glycosylase activity	0.0114644	Zm00001eb425930	GO:0008725
K150_MF	DNA-3-methylbase glycosylase activity	0.0114644	Zm00001eb425930	GO:0043733
K150_MF	alkylbase DNA N-glycosylase activity	0.0123762	Zm00001eb425930	GO:0003905
K150_MF	DNA N-glycosylase activity	0.0160159	Zm00001eb425930	GO:0019104
K150_MF	hydrolase activity, hydrolyzing N-glycosyl compounds	0.0371484	Zm00001eb425930	GO:0016799
K150_MF	structural constituent of ribosome	0.0473012	Zm00001eb027140,Zm00001eb272850	GO:0003735
K200_MF	﻿phosphatidylglycerophosphatase activity	0.000757252	Zm00001eb150880	GO:0008962
K200_MF	gamma-tubulin binding	0.00754788	Zm00001eb425980	GO:0043015
K200_MF	nitrate transmembrane transporter activity	0.0157876	Zm00001eb425910	GO:0015112
K200_MF	proteasome-activating activity	0.0172787	Zm00001eb240630	GO:0036402
K200_MF	DNA-3-methyladenine glycosylase activity	0.0187676	Zm00001eb425930	GO:0008725
K200_MF	DNA-3-methylbase glycosylase activity	0.0187676	Zm00001eb425930	GO:0043733
K200_MF	structural constituent of ribosome	0.0194355	Zm00001eb027140,Zm00001eb272850,Zm00001eb425920	GO:0003735
K200_MF	alkylbase DNA N-glycosylase activity	0.0202544	Zm00001eb425930	GO:0003905
K200_MF	DNA N-glycosylase activity	0.0261799	Zm00001eb425930	GO:0019104
K200_MF	structural molecule activity	0.0304699	Zm00001eb027140,Zm00001eb272850,Zm00001eb425920	GO:0005198
K300_MF	﻿phosphatidylglycerophosphatase activity	0.00105357	Zm00001eb150880	GO:0008962
K300_MF	chaperone binding	0.00424296	Zm00001eb097390,Zm00001eb240640	GO:0051087
K300_MF	UDP-N-acetylglucosamine diphosphorylase activity	0.00525709	Zm00001eb272890	GO:0003977
K300_MF	gamma-tubulin binding	0.0104874	Zm00001eb425980	GO:0043015
K300_MF	nitrate transmembrane transporter activity	0.0219005	Zm00001eb425910	GO:0015112
K300_MF	proteasome-activating activity	0.0239619	Zm00001eb240630	GO:0036402
K300_MF	DNA-3-methyladenine glycosylase activity	0.026019	Zm00001eb425930	GO:0008725
K300_MF	DNA-3-methylbase glycosylase activity	0.026019	Zm00001eb425930	GO:0043733
K300_MF	unfolded protein binding	0.0261919	Zm00001eb097390,Zm00001eb240640	GO:0051082
K300_MF	alkylbase DNA N-glycosylase activity	0.028072	Zm00001eb425930	GO:0003905
K300_MF	uridylyltransferase activity	0.028072	Zm00001eb272890	GO:0070569
K300_MF	adenyl-nucleotide exchange factor activity	0.0352243	Zm00001eb097390	GO:0000774
K300_MF	DNA N-glycosylase activity	0.0362419	Zm00001eb425930	GO:0019104
K300_MF	structural constituent of ribosome	0.0461193	Zm00001eb027140,Zm00001eb272850,Zm00001eb425920	GO:0003735
K300_MF	ATPase regulator activity	0.0483723	Zm00001eb097390	GO:0060590
K400_MF	﻿phosphatidylglycerophosphatase activity	0.00144866	Zm00001eb150880	GO:0008962
K400_MF	UDP-galactose:N-glycan beta-1,3-galactosyltransferase activity	0.00433982	Zm00001eb183150	GO:0010488
K400_MF	UDP-N-acetylglucosamine diphosphorylase activity	0.00722279	Zm00001eb272890	GO:0003977
K400_MF	chaperone binding	0.00790414	Zm00001eb097390,Zm00001eb240640	GO:0051087
K400_MF	peroxidase activity	0.0131227	Zm00001eb129890,Zm00001eb129900,Zm00001eb240670	GO:0004601
K400_MF	oxidoreductase activity, acting on peroxide as acceptor	0.0135386	Zm00001eb129890,Zm00001eb129900,Zm00001eb240670	GO:0016684
K400_MF	gamma-tubulin binding	0.0143946	Zm00001eb425980	GO:0043015
K400_MF	ADP binding	0.0190261	Zm00001eb150750,Zm00001eb150770	GO:0043531
K400_MF	electron transporter, transferring electrons within the cyclic electron transport pathway of photosynthesis activity	0.0200956	Zm00001eb183170	GO:0045156
K400_MF	antioxidant activity	0.0208186	Zm00001eb129890,Zm00001eb129900,Zm00001eb240670	GO:0016209
K400_MF	nitrate transmembrane transporter activity	0.0299948	Zm00001eb425910	GO:0015112
K400_MF	UDP-galactosyltransferase activity	0.0328052	Zm00001eb183150	GO:0035250
K400_MF	proteasome-activating activity	0.0328052	Zm00001eb240630	GO:0036402
K400_MF	DNA-3-methyladenine glycosylase activity	0.0356076	Zm00001eb425930	GO:0008725
K400_MF	DNA-3-methylbase glycosylase activity	0.0356076	Zm00001eb425930	GO:0043733
K400_MF	alkylbase DNA N-glycosylase activity	0.038402	Zm00001eb425930	GO:0003905
K400_MF	uridylyltransferase activity	0.038402	Zm00001eb272890	GO:0070569
K400_MF	unfolded protein binding	0.0469909	Zm00001eb097390,Zm00001eb240640	GO:0051082
K400_MF	adenyl-nucleotide exchange factor activity	0.0481205	Zm00001eb097390	GO:0000774
K400_MF	galactosyltransferase activity	0.049501	Zm00001eb183150	GO:0008378
K400_MF	DNA N-glycosylase activity	0.049501	Zm00001eb425930	GO:0019104
K500_MF	﻿DNA-3-methyladenine glycosylase activity	0.000906644	Zm00001eb150740,Zm00001eb425930	GO:0008725
K500_MF	DNA-3-methylbase glycosylase activity	0.000906644	Zm00001eb150740,Zm00001eb425930	GO:0043733
K500_MF	alkylbase DNA N-glycosylase activity	0.00105836	Zm00001eb150740,Zm00001eb425930	GO:0003905
K500_MF	DNA N-glycosylase activity	0.00177782	Zm00001eb150740,Zm00001eb425930	GO:0019104
K500_MF	phosphatidylglycerophosphatase activity	0.00177789	Zm00001eb150880	GO:0008962
K500_MF	ADP binding	0.00225552	Zm00001eb150720,Zm00001eb150750,Zm00001eb150770	GO:0043531
K500_MF	peroxidase activity	0.00314075	Zm00001eb129890,Zm00001eb129900,Zm00001eb129910,Zm00001eb240670	GO:0004601
K500_MF	oxidoreductase activity, acting on peroxide as acceptor	0.00327473	Zm00001eb129890,Zm00001eb129900,Zm00001eb129910,Zm00001eb240670	GO:0016684
K500_MF	UDP-galactose:N-glycan beta-1,3-galactosyltransferase activity	0.00532438	Zm00001eb183150	GO:0010488
K500_MF	antioxidant activity	0.00582644	Zm00001eb129890,Zm00001eb129900,Zm00001eb129910,Zm00001eb240670	GO:0016209
K500_MF	UDP-N-acetylglucosamine diphosphorylase activity	0.0088585	Zm00001eb272890	GO:0003977
K500_MF	hydrolase activity, hydrolyzing N-glycosyl compounds	0.00940772	Zm00001eb150740,Zm00001eb425930	GO:0016799
K500_MF	chaperone binding	0.0117248	Zm00001eb097390,Zm00001eb240640	GO:0051087
K500_MF	gamma-tubulin binding	0.01764	Zm00001eb425980	GO:0043015
K500_MF	electron transporter, transferring electrons within the cyclic electron transport pathway of photosynthesis activity	0.0246101	Zm00001eb183170	GO:0045156
K500_MF	nitrate transmembrane transporter activity	0.0366913	Zm00001eb425910	GO:0015112
K500_MF	UDP-galactosyltransferase activity	0.040116	Zm00001eb183150	GO:0035250
K500_MF	proteasome-activating activity	0.040116	Zm00001eb240630	GO:0036402
K500_MF	uridylyltransferase activity	0.0469296	Zm00001eb272890	GO:0070569
