# Supplementary material for: Archaeological Bolivian maize genomes suggest diversity is associated with Inca cultural expansion and environmental variation in South America
Source: Research Square preprint supplement (doi:10.21203/rs.3.rs-2592230/v1), 2023-03-03
Supplement: Supplementary file 5 [file 94ec42682d162ff88a4c1cd1.xlsx]

## Sheet: Supplementary Data Set 6
Supplementary DataSet 6. Gene Ontology Enrichment of top 1% gene of ancient mazie vs modern mazie.
Biological Process
fucose metabolic process	3.22895e-05	Zm00001eb023170,Zm00001eb040420,Zm00001eb103040,Zm00001eb138670,Zm00001eb232980,Zm00001eb288680	GO:0006004
pollination	0.000516039	Zm00001eb069410,Zm00001eb069480,Zm00001eb069490,Zm00001eb069550,Zm00001eb270920,Zm00001eb314550	GO:0009856
multi-multicellular organism process	0.000516039	Zm00001eb069410,Zm00001eb069480,Zm00001eb069490,Zm00001eb069550,Zm00001eb270920,Zm00001eb314550	GO:0044706
error-prone translesion synthesis	0.00257377	Zm00001eb161730,Zm00001eb409210	GO:0042276
cell recognition	0.00432663	Zm00001eb069410,Zm00001eb069480,Zm00001eb069490,Zm00001eb069550	GO:0008037
recognition of pollen	0.00432663	Zm00001eb069410,Zm00001eb069480,Zm00001eb069490,Zm00001eb069550	GO:0048544
pollen-pistil interaction	0.00451066	Zm00001eb069410,Zm00001eb069480,Zm00001eb069490,Zm00001eb069550	GO:0009875
maintenance of location in cell	0.00478866	Zm00001eb195650,Zm00001eb270920,Zm00001eb427520	GO:0051651
multi-organism process	0.00522461	Zm00001eb069410,Zm00001eb069480,Zm00001eb069490,Zm00001eb069550,Zm00001eb213700,Zm00001eb270920,Zm00001eb314550	GO:0051704
translesion synthesis	0.00585453	Zm00001eb161730,Zm00001eb409210	GO:0019985
heme metabolic process	0.00805075	Zm00001eb233020,Zm00001eb278690,Zm00001eb291360	GO:0042168
cell fate determination	0.00840189	Zm00001eb112960,Zm00001eb112970	GO:0001709
plasmodesmata-mediated intercellular transport	0.00934284	Zm00001eb362850,Zm00001eb380690	GO:0010497
cell fate commitment	0.01031	Zm00001eb112960,Zm00001eb112970,Zm00001eb195650	GO:0045165
maintenance of location	0.0108014	Zm00001eb195650,Zm00001eb270920,Zm00001eb427520	GO:0051235
porphyrin-containing compound metabolic process	0.010962	Zm00001eb129000,Zm00001eb233020,Zm00001eb278690,Zm00001eb291360	GO:0006778
tetrapyrrole metabolic process	0.0113008	Zm00001eb129000,Zm00001eb233020,Zm00001eb278690,Zm00001eb291360	GO:0033013
intercellular transport	0.011358	Zm00001eb362850,Zm00001eb380690	GO:0010496
purine nucleoside transmembrane transport	0.011358	Zm00001eb101160,Zm00001eb101170	GO:0015860
cellular response to gibberellin stimulus	0.011358	Zm00001eb270910,Zm00001eb335320	GO:0071370
hexose metabolic process	0.012076	Zm00001eb023170,Zm00001eb040420,Zm00001eb103040,Zm00001eb138670,Zm00001eb232980,Zm00001eb288680	GO:0019318
glycosyl compound catabolic process	0.0124307	Zm00001eb103040,Zm00001eb127230	GO:1901658
cellular developmental process	0.0136415	Zm00001eb112960,Zm00001eb112970,Zm00001eb195650,Zm00001eb270920,Zm00001eb278680,Zm00001eb314550,Zm00001eb335320	GO:0048869
translational initiation	0.0137192	Zm00001eb069390,Zm00001eb069420,Zm00001eb095240,Zm00001eb312360,Zm00001eb420170,Zm00001eb425860	GO:0006413
postreplication repair	0.0147028	Zm00001eb161730,Zm00001eb409210	GO:0006301
protoporphyrinogen IX biosynthetic process	0.017139	Zm00001eb233020,Zm00001eb291360	GO:0006782
protoporphyrinogen IX metabolic process	0.017139	Zm00001eb233020,Zm00001eb291360	GO:0046501
nucleoside transport	0.018417	Zm00001eb101160,Zm00001eb101170	GO:0015858
nucleoside transmembrane transport	0.018417	Zm00001eb101160,Zm00001eb101170	GO:1901642
nucleobase-containing compound transport	0.0184751	Zm00001eb001480,Zm00001eb026650,Zm00001eb101160,Zm00001eb101170,Zm00001eb354520	GO:0015931
gibberellic acid mediated signaling pathway	0.0197339	Zm00001eb270910,Zm00001eb335320	GO:0009740
gibberellin mediated signaling pathway	0.0197339	Zm00001eb270910,Zm00001eb335320	GO:0010476
peptidyl-cysteine modification	0.022482	Zm00001eb129020,Zm00001eb233020	GO:0018198
glycoside metabolic process	0.0230328	Zm00001eb103040	GO:0016137
glycoside catabolic process	0.0230328	Zm00001eb103040	GO:0016139
fructose 6-phosphate metabolic process	0.0239118	Zm00001eb270890,Zm00001eb350090	GO:0006002
phosphate-containing compound metabolic process	0.0242186	Zm00001eb028510,Zm00001eb029030,Zm00001eb040450,Zm00001eb069400,Zm00001eb069410,Zm00001eb069480,Zm00001eb069490,Zm00001eb069500,Zm00001eb069530,Zm00001eb069550,Zm00001eb070450,Zm00001eb070460,Zm00001eb136230,Zm00001eb138710,Zm00001eb148680,Zm00001eb161740,Zm00001eb161750,Zm00001eb182270,Zm00001eb195660,Zm00001eb213570,Zm00001eb213620,Zm00001eb214290,Zm00001eb214380,Zm00001eb222710,Zm00001eb230910…	GO:0006796
porphyrin-containing compound biosynthetic process	0.0242714	Zm00001eb129000,Zm00001eb233020,Zm00001eb291360	GO:0006779
developmental process	0.024982	Zm00001eb014610,Zm00001eb040800,Zm00001eb052070,Zm00001eb112960,Zm00001eb112970,Zm00001eb195650,Zm00001eb234500,Zm00001eb270920,Zm00001eb270930,Zm00001eb278670,Zm00001eb278680,Zm00001eb308480,Zm00001eb314550,Zm00001eb335320,Zm00001eb349860,Zm00001eb362850,Zm00001eb420160,Zm00001eb427600	GO:0032502
carbohydrate derivative catabolic process	0.0250648	Zm00001eb103040,Zm00001eb127230,Zm00001eb374160	GO:1901136
DNA synthesis involved in DNA repair	0.0253779	Zm00001eb161730,Zm00001eb409210	GO:0000731
maintenance of protein location in cell	0.0253779	Zm00001eb195650,Zm00001eb270920	GO:0032507
maintenance of protein location	0.0253779	Zm00001eb195650,Zm00001eb270920	GO:0045185
DNA biosynthetic process	0.0258011	Zm00001eb014620,Zm00001eb154140,Zm00001eb161730,Zm00001eb290510,Zm00001eb409210	GO:0071897
organophosphate metabolic process	0.0261497	Zm00001eb138710,Zm00001eb182270,Zm00001eb195660,Zm00001eb213570,Zm00001eb213620,Zm00001eb222710,Zm00001eb230950,Zm00001eb240960,Zm00001eb270890,Zm00001eb278650,Zm00001eb335270,Zm00001eb350090,Zm00001eb350100,Zm00001eb374080,Zm00001eb374160	GO:0019637
tetrapyrrole biosynthetic process	0.0266934	Zm00001eb129000,Zm00001eb233020,Zm00001eb291360	GO:0033014
actin polymerization or depolymerization	0.0275284	Zm00001eb213630,Zm00001eb266570,Zm00001eb270920	GO:0008154
phosphorus metabolic process	0.0295347	Zm00001eb028510,Zm00001eb029030,Zm00001eb040450,Zm00001eb069400,Zm00001eb069410,Zm00001eb069480,Zm00001eb069490,Zm00001eb069500,Zm00001eb069530,Zm00001eb069550,Zm00001eb070450,Zm00001eb070460,Zm00001eb136230,Zm00001eb138710,Zm00001eb148680,Zm00001eb161740,Zm00001eb161750,Zm00001eb182270,Zm00001eb195660,Zm00001eb213570,Zm00001eb213620,Zm00001eb214290,Zm00001eb214380,Zm00001eb222710,Zm00001eb230910…	GO:0006793
cell differentiation	0.0297544	Zm00001eb112960,Zm00001eb112970,Zm00001eb195650,Zm00001eb270920,Zm00001eb278680,Zm00001eb335320	GO:0030154
phosphoenolpyruvate transport	0.0305924	Zm00001eb042970	GO:0015714
peptidyl-pyrromethane cofactor linkage	0.0305924	Zm00001eb233020	GO:0018160
stamen morphogenesis	0.0305924	Zm00001eb314550	GO:0048448
anther morphogenesis	0.0305924	Zm00001eb314550	GO:0048654
anther wall tapetum morphogenesis	0.0305924	Zm00001eb314550	GO:0048655
maintenance of protein location in nucleus	0.0305924	Zm00001eb195650	GO:0051457
phosphoenolpyruvate transmembrane transport	0.0305924	Zm00001eb042970	GO:0089722
organic cyclic compound biosynthetic process	0.0322478	Zm00001eb014590,Zm00001eb014620,Zm00001eb028510,Zm00001eb052070,Zm00001eb070490,Zm00001eb101130,Zm00001eb112440,Zm00001eb129000,Zm00001eb138710,Zm00001eb144750,Zm00001eb154140,Zm00001eb161730,Zm00001eb182260,Zm00001eb182270,Zm00001eb191610,Zm00001eb195650,Zm00001eb213620,Zm00001eb214240,Zm00001eb233020,Zm00001eb234500,Zm00001eb236380,Zm00001eb240960,Zm00001eb248680,Zm00001eb270930,Zm00001eb278670…	GO:1901362
monosaccharide metabolic process	0.0368936	Zm00001eb023170,Zm00001eb040420,Zm00001eb103040,Zm00001eb138670,Zm00001eb232980,Zm00001eb288680	GO:0005996
methionyl-tRNA aminoacylation	0.0380938	Zm00001eb007130	GO:0006431
cAMP-mediated signaling	0.0380938	Zm00001eb040800	GO:0019933
cyclic-nucleotide-mediated signaling	0.0380938	Zm00001eb040800	GO:0019935
regulation of adenylate cyclase activity	0.0380938	Zm00001eb040800	GO:0045761
regulation of vesicle targeting, to, from or within Golgi	0.0380938	Zm00001eb230940	GO:0048209
regulation of lyase activity	0.0380938	Zm00001eb040800	GO:0051339
bundle sheath cell fate specification	0.0380938	Zm00001eb195650	GO:0090610
glycolytic process through fructose-6-phosphate	0.0383393	Zm00001eb270890,Zm00001eb350090	GO:0061615
pigment metabolic process	0.0389167	Zm00001eb129000,Zm00001eb233020,Zm00001eb278690,Zm00001eb291360	GO:0042440
heme biosynthetic process	0.0418997	Zm00001eb233020,Zm00001eb291360	GO:0006783
purine-containing compound transmembrane transport	0.0418997	Zm00001eb101160,Zm00001eb101170	GO:0072530
double-strand break repair via homologous recombination	0.0427502	Zm00001eb014620,Zm00001eb161730,Zm00001eb290510	GO:0000724
triose phosphate transport	0.0455374	Zm00001eb042970	GO:0015717
nuclear-transcribed mRNA catabolic process, deadenylation-independent decay	0.0455374	Zm00001eb253140	GO:0031086
deadenylation-independent decapping of nuclear-transcribed mRNA	0.0455374	Zm00001eb253140	GO:0031087
triose phosphate transmembrane transport	0.0455374	Zm00001eb042970	GO:0035436
SNARE complex assembly	0.0455374	Zm00001eb291290	GO:0035493
photomorphogenesis	0.0474615	Zm00001eb270930,Zm00001eb427600	GO:0009640
recombinational repair	0.0493427	Zm00001eb014620,Zm00001eb161730,Zm00001eb290510	GO:0000725
Cellular Componen
protein-containing complex	0.00393311	Zm00001eb001480,Zm00001eb014540,Zm00001eb014610,Zm00001eb014620,Zm00001eb026650,Zm00001eb038500,Zm00001eb040830,Zm00001eb069390,Zm00001eb069420,Zm00001eb095240,Zm00001eb112400,Zm00001eb143180,Zm00001eb144740,Zm00001eb144750,Zm00001eb151050,Zm00001eb151060,Zm00001eb154140,Zm00001eb161730,Zm00001eb182270,Zm00001eb213670,Zm00001eb214240,Zm00001eb214290,Zm00001eb222700,Zm00001eb222710,Zm00001eb230940…	GO:0032991
eukaryotic translation initiation factor 3 complex	0.00732243	Zm00001eb069390,Zm00001eb069420,Zm00001eb095240	GO:0005852
dynactin complex	0.015183	Zm00001eb014610	GO:0005869
zeta DNA polymerase complex	0.015183	Zm00001eb161730	GO:0016035
nuclear pore inner ring	0.015183	Zm00001eb026650	GO:0044611
endosome	0.019068	Zm00001eb014560,Zm00001eb038500,Zm00001eb222700,Zm00001eb230940,Zm00001eb291290,Zm00001eb291530,Zm00001eb369840,Zm00001eb374170	GO:0005768
chloroplast photosystem I	0.0226882	Zm00001eb409220	GO:0030093
Golgi transport complex	0.0315765	Zm00001eb014540,Zm00001eb222700,Zm00001eb374170	GO:0017119
trans-Golgi network	0.0344303	Zm00001eb014560,Zm00001eb222700,Zm00001eb230940,Zm00001eb291530,Zm00001eb374170	GO:0005802
Golgi medial cisterna	0.0375284	Zm00001eb230940	GO:0005797
AP-3 adaptor complex	0.0375284	Zm00001eb260950	GO:0030123
cytosolic small ribosomal subunit	0.0378116	Zm00001eb069420,Zm00001eb151050,Zm00001eb260960,Zm00001eb382750	GO:0022627
actin cytoskeleton	0.038144	Zm00001eb014610,Zm00001eb213630,Zm00001eb266570	GO:0015629
DNA polymerase complex	0.0390103	Zm00001eb154140,Zm00001eb161730	GO:0042575
Pwp2p-containing subcomplex of 90S preribosome	0.0448642	Zm00001eb040830	GO:0034388
chloroplast thylakoid membrane protein complex	0.0448642	Zm00001eb409220	GO:0098807
Molecular Function
scopolin beta-glucosidase activity	0.0016186	Zm00001eb288750,Zm00001eb288760	GO:0102483
alditol:NADP+ 1-oxidoreductase activity	0.00439539	Zm00001eb101150,Zm00001eb148000	GO:0004032
aldo-keto reductase (NADP) activity	0.00439539	Zm00001eb101150,Zm00001eb148000	GO:0004033
alcohol dehydrogenase (NADP+) activity	0.00439539	Zm00001eb101150,Zm00001eb148000	GO:0008106
D-threo-aldose 1-dehydrogenase activity	0.00648281	Zm00001eb101150,Zm00001eb147990,Zm00001eb148000	GO:0047834
DNA polymerase activity	0.00690461	Zm00001eb014620,Zm00001eb154140,Zm00001eb161730,Zm00001eb409210	GO:0034061
adenylate cyclase activity	0.00773713	Zm00001eb040800	GO:0004016
mannosyl-oligosaccharide glucosidase activity	0.00773713	Zm00001eb143210	GO:0004573
adenylate cyclase binding	0.00773713	Zm00001eb040800	GO:0008179
intramolecular transferase activity, transferring amino groups	0.00773713	Zm00001eb291360	GO:0016869
glutamate-1-semialdehyde 2,1-aminomutase activity	0.00773713	Zm00001eb291360	GO:0042286
DNA-directed DNA polymerase activity	0.00892398	Zm00001eb154140,Zm00001eb161730,Zm00001eb409210	GO:0003887
phosphorus-oxygen lyase activity	0.0103325	Zm00001eb040800,Zm00001eb182270	GO:0016849
pectate lyase activity	0.0103325	Zm00001eb148660,Zm00001eb151040	GO:0030570
translation initiation factor activity	0.0112387	Zm00001eb069390,Zm00001eb069420,Zm00001eb095240,Zm00001eb312360,Zm00001eb420170,Zm00001eb425860	GO:0003743
purine nucleoside transmembrane transporter activity	0.0113623	Zm00001eb101160,Zm00001eb101170	GO:0015211
carbon-oxygen lyase activity, acting on polysaccharides	0.0124354	Zm00001eb148660,Zm00001eb151040	GO:0016837
C-5 sterol desaturase activity	0.0154147	Zm00001eb335380	GO:0000248
dihydrouracil dehydrogenase (NAD+) activity	0.0154147	Zm00001eb240960	GO:0004159
5-amino-6-(5-phosphoribosylamino)uracil reductase activity	0.0154147	Zm00001eb240960	GO:0008703
phosphomethylpyrimidine kinase activity	0.0154147	Zm00001eb138710	GO:0008972
triose-phosphate:phosphate antiporter activity	0.0154147	Zm00001eb042970	GO:0009670
high-affinity secondary active ammonium transmembrane transporter activity	0.0154147	Zm00001eb289990	GO:0015398
sterol desaturase activity	0.0154147	Zm00001eb335380	GO:0070704
translation initiation factor binding	0.0159066	Zm00001eb069390,Zm00001eb069420	GO:0031369
nucleoside transmembrane transporter activity	0.0184236	Zm00001eb101160,Zm00001eb101170	GO:0005337
thiamine-phosphate diphosphorylase activity	0.023033	Zm00001eb138710	GO:0004789
diaminohydroxyphosphoribosylaminopyrimidine deaminase activity	0.023033	Zm00001eb240960	GO:0008835
magnesium-protoporphyrin IX monomethyl ester (oxidative) cyclase activity	0.023033	Zm00001eb129000	GO:0048529
ADP binding	0.0270761	Zm00001eb042890,Zm00001eb226690,Zm00001eb291370,Zm00001eb349360	GO:0043531
IMP dehydrogenase activity	0.0305927	Zm00001eb213620	GO:0003938
hydroxymethylbilane synthase activity	0.0305927	Zm00001eb233020	GO:0004418
sarcosine oxidase activity	0.0305927	Zm00001eb340420	GO:0008115
phosphoenolpyruvate:phosphate antiporter activity	0.0305927	Zm00001eb042970	GO:0015121
organophosphate:inorganic phosphate antiporter activity	0.0305927	Zm00001eb042970	GO:0015315
secondary active monocarboxylate transmembrane transporter activity	0.0305927	Zm00001eb042970	GO:0015355
sucrose-phosphate phosphatase activity	0.0305927	Zm00001eb351280	GO:0050307
phosphoenolpyruvate transmembrane transporter activity	0.0305927	Zm00001eb042970	GO:0089721
transferase activity, transferring phosphorus-containing groups	0.032589	Zm00001eb014620,Zm00001eb028510,Zm00001eb029030,Zm00001eb040450,Zm00001eb069400,Zm00001eb069410,Zm00001eb069480,Zm00001eb069490,Zm00001eb069500,Zm00001eb069530,Zm00001eb069550,Zm00001eb070450,Zm00001eb070460,Zm00001eb138710,Zm00001eb144750,Zm00001eb148680,Zm00001eb154140,Zm00001eb161730,Zm00001eb161740,Zm00001eb161750,Zm00001eb195660,Zm00001eb214290,Zm00001eb230910,Zm00001eb230950,Zm00001eb263000…	GO:0016772
phosphoribosylformylglycinamidine cyclo-ligase activity	0.0380941	Zm00001eb350100	GO:0004641
methionine-tRNA ligase activity	0.0380941	Zm00001eb007130	GO:0004825
6-phosphofructokinase activity	0.0383511	Zm00001eb270890,Zm00001eb350090	GO:0003872
oxidoreductase activity, acting on the CH-OH group of donors, NAD or NADP as acceptor	0.0384354	Zm00001eb101150,Zm00001eb147990,Zm00001eb148000,Zm00001eb191610,Zm00001eb213620,Zm00001eb240960	GO:0016616
phosphofructokinase activity	0.0437377	Zm00001eb270890,Zm00001eb350090	GO:0008443
alpha-L-fucosidase activity	0.0455377	Zm00001eb103040	GO:0004560
triose-phosphate transmembrane transporter activity	0.0455377	Zm00001eb042970	GO:0071917
phosphotransferase activity, for other substituted phosphate groups	0.0474751	Zm00001eb278650,Zm00001eb335270	GO:0016780
carbohydrate derivative transmembrane transporter activity	0.0482443	Zm00001eb042970,Zm00001eb101160,Zm00001eb101170	GO:1901505
actin binding	0.0491362	Zm00001eb040800,Zm00001eb213630,Zm00001eb266570,Zm00001eb270920	GO:0003779
#Entry	Entry name	Status	Gene names(primary )	Organism	Gene names(ORF)	Gene names(primary )	Gene names(synonym )	Protein names
A0A1D6JLQ5	A0A1D6JLQ5_MAIZE	unreviewed	103631020	Zea mays (Maize)	Zm00001eb001480	103631020		THO complex subunit 7B-like1
A0A317Y3J4	A0A317Y3J4_MAIZE	unreviewed	THO7B_0	Zea mays (Maize)	Zm00001eb001480	THO7B_0		THO complex subunit 7B
A0A1D6JLQ8	A0A1D6JLQ8_MAIZE	unreviewed		Zea mays (Maize)	Zm00001eb001490			ALA-interacting subunit
A0A317Y3S8	A0A317Y3S8_MAIZE	unreviewed		Zea mays (Maize)	Zm00001eb001490			ALA-interacting subunit
A0A317Y4E2	A0A317Y4E2_MAIZE	unreviewed		Zea mays (Maize)	Zm00001eb001490			ALA-interacting subunit
B4FDP2	B4FDP2_MAIZE	unreviewed	100193072	Zea mays (Maize)	Zm00001eb001490	100193072		ALA-interacting subunit
A0A1D6JLR5	A0A1D6JLR5_MAIZE	unreviewed		Zea mays (Maize)	Zm00001eb001500			Uncharacterized protein
A0A1D6JLR7	A0A1D6JLR7_MAIZE	unreviewed	100272698	Zea mays (Maize)	Zm00001eb001500	100272698		Uncharacterized protein
A0A1D6JLR8	A0A1D6JLR8_MAIZE	unreviewed		Zea mays (Maize)	Zm00001eb001500			Uncharacterized protein
A0A317YH00	A0A317YH00_MAIZE	unreviewed		Zea mays (Maize)	Zm00001eb001500			Uncharacterized protein
A0A317YHA8	A0A317YHA8_MAIZE	unreviewed		Zea mays (Maize)	Zm00001eb001500			Uncharacterized protein
A0A317YHC4	A0A317YHC4_MAIZE	unreviewed		Zea mays (Maize)	Zm00001eb001500			Uncharacterized protein
A0A317YJJ4	A0A317YJJ4_MAIZE	unreviewed		Zea mays (Maize)	Zm00001eb001500			Uncharacterized protein
B4FQ01	B4FQ01_MAIZE	unreviewed		Zea mays (Maize)	Zm00001eb001500			Uncharacterized protein
B4FT60	B4FT60_MAIZE	unreviewed		Zea mays (Maize)	Zm00001eb001500			Uncharacterized protein
B8A1Y8	B8A1Y8_MAIZE	unreviewed		Zea mays (Maize)	Zm00001eb001500			Uncharacterized protein
C0PPF8	C0PPF8_MAIZE	unreviewed	100272698	Zea mays (Maize)	Zm00001eb001500	100272698		Uncharacterized protein
A0A1D6JLS0	A0A1D6JLS0_MAIZE	unreviewed	100501751	Zea mays (Maize)	Zm00001eb001510	100501751		Remorin family protein
A0A1D6JLS1	A0A1D6JLS1_MAIZE	unreviewed		Zea mays (Maize)	Zm00001eb001510			Remorin family protein
A0A317Y3R9	A0A317Y3R9_MAIZE	unreviewed		Zea mays (Maize)	Zm00001eb001510			Remorin_C domain-containing protein
A0A317Y4P2	A0A317Y4P2_MAIZE	unreviewed		Zea mays (Maize)	Zm00001eb001510			Remorin_C domain-containing protein
C4J5M4	C4J5M4_MAIZE	unreviewed	100501751	Zea mays (Maize)	Zm00001eb001510	100501751		Remorin_C domain-containing protein
A0A1D6JRH3	A0A1D6JRH3_MAIZE	unreviewed		Zea mays (Maize)	Zm00001eb007130			Methionine--tRNA ligase (EC 6.1.1.10)
A0A1D6JRH4	A0A1D6JRH4_MAIZE	unreviewed		Zea mays (Maize)	Zm00001eb007130			Methionine--tRNA ligase chloroplastic/mitochondrial
A0A1D6JRH6	A0A1D6JRH6_MAIZE	unreviewed		Zea mays (Maize)	Zm00001eb007130			Methionine--tRNA ligase chloroplastic/mitochondrial
A0A1D6JRH7	A0A1D6JRH7_MAIZE	unreviewed		Zea mays (Maize)	Zm00001eb007130			Methionine--tRNA ligase chloroplastic/mitochondrial
A0A1D6JRH8	A0A1D6JRH8_MAIZE	unreviewed		Zea mays (Maize)	Zm00001eb007130			Methionine--tRNA ligase (EC 6.1.1.10)
A0A1D6JRH9	A0A1D6JRH9_MAIZE	unreviewed		Zea mays (Maize)	Zm00001eb007130			Methionine--tRNA ligase chloroplastic/mitochondrial
A0A1D6JRI0	A0A1D6JRI0_MAIZE	unreviewed		Zea mays (Maize)	Zm00001eb007130			Methionine--tRNA ligase (EC 6.1.1.10)
A0A1D6JRI1	A0A1D6JRI1_MAIZE	unreviewed		Zea mays (Maize)	Zm00001eb007130			Methionine--tRNA ligase chloroplastic/mitochondrial
A0A317Y537	A0A317Y537_MAIZE	unreviewed		Zea mays (Maize)	Zm00001eb007130			Methionine--tRNA ligase (EC 6.1.1.10)
A0A317Y7T2	A0A317Y7T2_MAIZE	unreviewed		Zea mays (Maize)	Zm00001eb007130			Methionine--tRNA ligase (EC 6.1.1.10)
A0A1D6JRJ1	A0A1D6JRJ1_MAIZE	unreviewed		Zea mays (Maize)	Zm00001eb007150			Got1/Sft2-like vescicle transport protein family
A0A317YGF7	A0A317YGF7_MAIZE	unreviewed		Zea mays (Maize)	Zm00001eb007150			Uncharacterized protein
A0A317YI07	A0A317YI07_MAIZE	unreviewed		Zea mays (Maize)	Zm00001eb007150			Vesicle transport protein GOT1
B4FM03	B4FM03_MAIZE	unreviewed	100284198	Zea mays (Maize)	Zm00001eb007150	100284198		Golgi transport 1 protein B (Got1/Sft2-like vescicle transport protein family)
A0A1D6F114	A0A1D6F114_MAIZE	unreviewed		Zea mays (Maize)	Zm00001eb014540			Component of oligomeric Golgi complex 8 (Conserved oligomeric Golgi complex subunit 8)
A0A1D6K087	A0A1D6K087_MAIZE	unreviewed		Zea mays (Maize)	Zm00001eb014540			Component of oligomeric Golgi complex 8 (Conserved oligomeric Golgi complex subunit 8)
A0A1D6K088	A0A1D6K088_MAIZE	unreviewed		Zea mays (Maize)	Zm00001eb014540			Tubulin beta chain
A0A317YAU8	A0A317YAU8_MAIZE	unreviewed	TUBB1_0	Zea mays (Maize)	Zm00001eb014540	TUBB1_0		Component of oligomeric Golgi complex 8 (Conserved oligomeric Golgi complex subunit 8)
A0A3L6E2B7	A0A3L6E2B7_MAIZE	unreviewed	TUBB1_1	Zea mays (Maize)	Zm00001eb014540	TUBB1_1		Tubulin beta-1 chain
A0A1D6K089	A0A1D6K089_MAIZE	unreviewed		Zea mays (Maize)	Zm00001eb014550			Outer envelope pore protein 16-2 chloroplastic
A0A1D6K091	A0A1D6K091_MAIZE	unreviewed		Zea mays (Maize)	Zm00001eb014550			Outer envelope pore protein 16-2 chloroplastic
A0A1D6K092	A0A1D6K092_MAIZE	unreviewed		Zea mays (Maize)	Zm00001eb014550			Outer envelope pore protein 16-2 chloroplastic
A0A317YIA9	A0A317YIA9_MAIZE	unreviewed		Zea mays (Maize)	Zm00001eb014550			Outer envelope pore protein 16-2, chloroplastic
A0A317YKE7	A0A317YKE7_MAIZE	unreviewed		Zea mays (Maize)	Zm00001eb014550			Uncharacterized protein
B6SIR2	B6SIR2_MAIZE	unreviewed		Zea mays (Maize)	Zm00001eb014550			Uncharacterized protein
B6SM89	B6SM89_MAIZE	unreviewed		Zea mays (Maize)	Zm00001eb014550			Uncharacterized protein
B6UFN0	B6UFN0_MAIZE	unreviewed		Zea mays (Maize)	Zm00001eb014550			Outer envelope pore protein 16-2 chloroplastic
A0A1D6K093	A0A1D6K093_MAIZE	unreviewed		Zea mays (Maize)	Zm00001eb014560			Xyloglucan 6-xylosyltransferase 2
A0A1D6PC37	A0A1D6PC37_MAIZE	unreviewed		Zea mays (Maize)	Zm00001eb014560			Xyloglucan 6-xylosyltransferase 2
A0A317YD64	A0A317YD64_MAIZE	unreviewed	GT4_5	Zea mays (Maize)	Zm00001eb014560	GT4_5		Putative glycosyltransferase 4
A0A3L6DGD6	A0A3L6DGD6_MAIZE	unreviewed	GT4_0	Zea mays (Maize)	Zm00001eb014560	GT4_0		Putative glycosyltransferase 4
K7VMJ7	K7VMJ7_MAIZE	unreviewed		Zea mays (Maize)	Zm00001eb014560			Xyloglucan 6-xylosyltransferase 2
A0A1D6F4R0	A0A1D6F4R0_MAIZE	unreviewed		Zea mays (Maize)	Zm00001eb014570			Lon protease homolog 2 peroxisomal
A0A1D6F4R8	A0A1D6F4R8_MAIZE	unreviewed		Zea mays (Maize)	Zm00001eb014570			Lon protease homolog 2 peroxisomal
A0A1D6F4S0	A0A1D6F4S0_MAIZE	unreviewed		Zea mays (Maize)	Zm00001eb014570			Lon protease homolog 2 peroxisomal
A0A1D6IP20	A0A1D6IP20_MAIZE	unreviewed		Zea mays (Maize)	Zm00001eb014570			LON protease2
A0A1D6IP25	A0A1D6IP25_MAIZE	unreviewed		Zea mays (Maize)	Zm00001eb014570			LON protease2
A0A1D6IP27	A0A1D6IP27_MAIZE	unreviewed		Zea mays (Maize)	Zm00001eb014570			LON protease2
A0A060D2L0	A0A060D2L0_MAIZE	unreviewed	bZIP24	Zea mays (Maize)	Zm00001eb014590	bZIP24	103644612	BZIP transcription factor (Ocs element-binding factor 1) (Fragment)
A0A1D6K0A2	A0A1D6K0A2_MAIZE	unreviewed		Zea mays (Maize)	Zm00001eb014610			Actin-11
A0A1D6K0A5	A0A1D6K0A5_MAIZE	unreviewed		Zea mays (Maize)	Zm00001eb014630			Uncharacterized protein
A0A317YAK5	A0A317YAK5_MAIZE	unreviewed		Zea mays (Maize)	Zm00001eb014630			Uncharacterized protein
B4FLZ4	B4FLZ4_MAIZE	unreviewed	100275347	Zea mays (Maize)	Zm00001eb014630	100275347		Uncharacterized protein
A0A1D6K4M8	A0A1D6K4M8_MAIZE	unreviewed		Zea mays (Maize)	Zm00001eb018690			Non-specific lipid transfer protein-like 1
A0A1D6K4N0	A0A1D6K4N0_MAIZE	unreviewed		Zea mays (Maize)	Zm00001eb018690			Non-specific lipid transfer protein-like 1
A0A317Y8M6	A0A317Y8M6_MAIZE	unreviewed	LTPL1_2	Zea mays (Maize)	Zm00001eb018690	LTPL1_2		Non-specific lipid transfer protein-like 1
B4FPA4	B4FPA4_MAIZE	unreviewed	100276627	Zea mays (Maize)	Zm00001eb018690	100276627		Non-specific lipid transfer protein-like 1 (Xylogen protein 1)
A0A1D6K4N2	A0A1D6K4N2_MAIZE	unreviewed		Zea mays (Maize)	Zm00001eb018700			Transducin/WD40 repeat-like superfamily protein
A0A1D6K4N3	A0A1D6K4N3_MAIZE	unreviewed		Zea mays (Maize)	Zm00001eb018700			Transducin/WD40 repeat-like superfamily protein
A0A317Y760	A0A317Y760_MAIZE	unreviewed	SPBC2A9.03_3	Zea mays (Maize)	Zm00001eb018700	SPBC2A9.03_3		Putative WD repeat-containing protein C2A9.03
B6SGQ0	B6SGQ0_MAIZE	unreviewed		Zea mays (Maize)	Zm00001eb018700			Transducin/WD40 repeat-like superfamily protein
A0A317YIY1	A0A317YIY1_MAIZE	unreviewed		Zea mays (Maize)	Zm00001eb023170			O-fucosyltransferase family protein
B4FBQ1	B4FBQ1_MAIZE	unreviewed		Zea mays (Maize)	Zm00001eb023170			Uncharacterized protein
C0HIR6	C0HIR6_MAIZE	unreviewed		Zea mays (Maize)	Zm00001eb023170			O-fucosyltransferase family protein
A0A317YKT0	A0A317YKT0_MAIZE	unreviewed		Zea mays (Maize)	Zm00001eb023180			Uncharacterized protein
C0P8T9	C0P8T9_MAIZE	unreviewed	100382542	Zea mays (Maize)	Zm00001eb023180	100382542		Uncharacterized protein
A0A317YAC2	A0A317YAC2_MAIZE	unreviewed	PCKR1	Zea mays (Maize)	Zm00001eb026640	PCKR1		Peptidyl-prolyl cis-trans isomerase (PPIase) (EC 5.2.1.8)
B6TB16	B6TB16_MAIZE	unreviewed	100282750	Zea mays (Maize)	Zm00001eb026640	100282750		Peptidyl-prolyl cis-trans isomerase (PPIase) (EC 5.2.1.8)
A0A1D6KBY4	A0A1D6KBY4_MAIZE	unreviewed		Zea mays (Maize)	Zm00001eb026650			Uncharacterized protein
A0A1D6KC02	A0A1D6KC02_MAIZE	unreviewed		Zea mays (Maize)	Zm00001eb026650			Uncharacterized protein
A0A1D6KC07	A0A1D6KC07_MAIZE	unreviewed		Zea mays (Maize)	Zm00001eb026650			Uncharacterized protein
A0A1D6KC15	A0A1D6KC15_MAIZE	unreviewed		Zea mays (Maize)	Zm00001eb026650			Uncharacterized protein
A0A1D6KC18	A0A1D6KC18_MAIZE	unreviewed		Zea mays (Maize)	Zm00001eb026650			Uncharacterized protein
A0A1D6KC19	A0A1D6KC19_MAIZE	unreviewed		Zea mays (Maize)	Zm00001eb026650			Uncharacterized protein
A0A1D6KC27	A0A1D6KC27_MAIZE	unreviewed		Zea mays (Maize)	Zm00001eb026650			Uncharacterized protein
A0A1D6KC29	A0A1D6KC29_MAIZE	unreviewed		Zea mays (Maize)	Zm00001eb026650			Uncharacterized protein
A0A1D6KC31	A0A1D6KC31_MAIZE	unreviewed		Zea mays (Maize)	Zm00001eb026650			Uncharacterized protein
A0A1D6KC32	A0A1D6KC32_MAIZE	unreviewed		Zea mays (Maize)	Zm00001eb026650			Uncharacterized protein
A0A1D6KC38	A0A1D6KC38_MAIZE	unreviewed		Zea mays (Maize)	Zm00001eb026650			Uncharacterized protein
A0A1D6KCW0	A0A1D6KCW0_MAIZE	unreviewed		Zea mays (Maize)	Zm00001eb027900			Spermidine hydroxycinnamoyl transferase
A0A1D6KCW1	A0A1D6KCW1_MAIZE	unreviewed	103639152	Zea mays (Maize)	Zm00001eb027900	103639152		Hydroxycinnamoyltransferase4
A0A317YDE7	A0A317YDE7_MAIZE	unreviewed	THT2_0	Zea mays (Maize)	Zm00001eb027900	THT2_0	THT2_1	Tryptamine hydroxycinnamoyltransferase 2
A0A1D6KCZ2	A0A1D6KCZ2_MAIZE	unreviewed	100193705	Zea mays (Maize)	Zm00001eb028030	100193705		Alanine aminotransferase 2 mitochondrial
A0A317YIT9	A0A317YIT9_MAIZE	unreviewed	ALA2_3	Zea mays (Maize)	Zm00001eb028030	ALA2_3		Alanine aminotransferase 2
A0A3L6DJB8	A0A3L6DJB8_MAIZE	unreviewed	ALAAT2_2	Zea mays (Maize)	Zm00001eb028030	ALAAT2_2		Alanine aminotransferase 2, mitochondrial
B4FG03	B4FG03_MAIZE	unreviewed		Zea mays (Maize)	Zm00001eb028030			Uncharacterized protein
A0A1D6KD95	A0A1D6KD95_MAIZE	unreviewed		Zea mays (Maize)	Zm00001eb028510			PAS domain-containing protein tyrosine kinase family protein (Fragment)
A0A1D6KD96	A0A1D6KD96_MAIZE	unreviewed		Zea mays (Maize)	Zm00001eb028510			PAS domain-containing protein tyrosine kinase family protein
A0A1D6PND3	A0A1D6PND3_MAIZE	unreviewed		Zea mays (Maize)	Zm00001eb028510			Protein kinase domain superfamily protein
A0A1D6PND4	A0A1D6PND4_MAIZE	unreviewed		Zea mays (Maize)	Zm00001eb028510			Protein kinase domain superfamily protein
A0A1D6PND8	A0A1D6PND8_MAIZE	unreviewed		Zea mays (Maize)	Zm00001eb028510			Protein kinase domain superfamily protein
A0A317Y2E1	A0A317Y2E1_MAIZE	unreviewed		Zea mays (Maize)	Zm00001eb028510			Serine/threonine-protein kinase EDR1
C4J107	C4J107_MAIZE	unreviewed	100501094	Zea mays (Maize)	Zm00001eb028510	100501094		PAS domain-containing protein tyrosine kinase family protein
A0A1D6KD97	A0A1D6KD97_MAIZE	unreviewed		Zea mays (Maize)	Zm00001eb028520			Putative prefoldin subunit 3
A0A1D6KD99	A0A1D6KD99_MAIZE	unreviewed		Zea mays (Maize)	Zm00001eb028520			Prefoldin subunit 3
A0A1D6KDA0	A0A1D6KDA0_MAIZE	unreviewed		Zea mays (Maize)	Zm00001eb028520			Putative prefoldin subunit 3
A0A1D6KDA1	A0A1D6KDA1_MAIZE	unreviewed		Zea mays (Maize)	Zm00001eb028520			Putative prefoldin subunit 3
A0A1D6KDA2	A0A1D6KDA2_MAIZE	unreviewed		Zea mays (Maize)	Zm00001eb028520			Putative prefoldin subunit 3
A0A1D6KDA5	A0A1D6KDA5_MAIZE	unreviewed		Zea mays (Maize)	Zm00001eb028520			Putative prefoldin subunit 3
A0A317Y510	A0A317Y510_MAIZE	unreviewed		Zea mays (Maize)	Zm00001eb028520			Prefoldin subunit 3
B4FQ18	B4FQ18_MAIZE	unreviewed	100283660	Zea mays (Maize)	Zm00001eb028520	100283660		Prefoldin subunit 3
B6TKE7	B6TKE7_MAIZE	unreviewed		Zea mays (Maize)	Zm00001eb028520			Prefoldin subunit 3
A0A1D6KE06	A0A1D6KE06_MAIZE	unreviewed		Zea mays (Maize)	Zm00001eb029030			Protein kinase
A0A317YK46	A0A317YK46_MAIZE	unreviewed	STY8_3	Zea mays (Maize)	Zm00001eb029030	STY8_3		Serine/threonine-protein kinase STY8
A0A1D6KE07	A0A1D6KE07_MAIZE	unreviewed		Zea mays (Maize)	Zm00001eb029040			Uncharacterized protein
A0A1D6KE08	A0A1D6KE08_MAIZE	unreviewed		Zea mays (Maize)	Zm00001eb029040			Uncharacterized protein
Q84QI1	Q84QI1_MAIZE	unreviewed		Zea mays (Maize)	Zm00001eb029110			Actin (Fragment)
A0A1D6KGM0	A0A1D6KGM0_MAIZE	unreviewed	103640631	Zea mays (Maize)	Zm00001eb032280	103640631		Cysteine dioxygenase (EC 1.13.11.20)
A0A1D6KGM1	A0A1D6KGM1_MAIZE	unreviewed		Zea mays (Maize)	Zm00001eb032280			Cupin, RmlC-type
A0A317Y1C9	A0A317Y1C9_MAIZE	unreviewed	PCO1_2	Zea mays (Maize)	Zm00001eb032280	PCO1_2		Cysteine dioxygenase (EC 1.13.11.20)
B6TB90	B6TB90_MAIZE	unreviewed		Zea mays (Maize)	Zm00001eb032280			Cysteine dioxygenase (EC 1.13.11.20)
A0A1D6KJL3	A0A1D6KJL3_MAIZE	unreviewed		Zea mays (Maize)	Zm00001eb035870			Uncharacterized protein
A0A1D6H7R0	A0A1D6H7R0_MAIZE	unreviewed		Zea mays (Maize)	Zm00001eb035880			Uncharacterized protein
A0A1D6H7T3	A0A1D6H7T3_MAIZE	unreviewed		Zea mays (Maize)	Zm00001eb035880			Uncharacterized protein
A0A1D6H7T8	A0A1D6H7T8_MAIZE	unreviewed		Zea mays (Maize)	Zm00001eb035880			Uncharacterized protein
A0A1D6KJL5	A0A1D6KJL5_MAIZE	unreviewed		Zea mays (Maize)	Zm00001eb035880			Uncharacterized protein
A0A060D196	A0A060D196_MAIZE	unreviewed	TRAF12	Zea mays (Maize)	Zm00001eb035890	TRAF12		TRAF transcription factor (Fragment)
A0A1D6KJL6	A0A1D6KJL6_MAIZE	unreviewed		Zea mays (Maize)	Zm00001eb035890			TD and POZ domain-containing protein 3
A0A060D1K8	A0A060D1K8_MAIZE	unreviewed	Orphan171	Zea mays (Maize)	Zm00001eb035900	Orphan171	103645152	Orphans transcription factor (Fragment)
A0A1D6KJL7	A0A1D6KJL7_MAIZE	unreviewed		Zea mays (Maize)	Zm00001eb035900			TD and POZ domain-containing protein 3
A0A317Y0C3	A0A317Y0C3_MAIZE	unreviewed	BPM1_5	Zea mays (Maize)	Zm00001eb035900	BPM1_5		BTB/POZ and MATH domain-containing protein 1
A0A317Y3B1	A0A317Y3B1_MAIZE	unreviewed	BPM2_2	Zea mays (Maize)	Zm00001eb035900	BPM2_2		BTB/POZ and MATH domain-containing protein 2
A0A317Y7N8	A0A317Y7N8_MAIZE	unreviewed	BPM1_3	Zea mays (Maize)	Zm00001eb035900	BPM1_3		BTB/POZ and MATH domain-containing protein 1
A0A060D7E9	A0A060D7E9_MAIZE	unreviewed	TRAF44	Zea mays (Maize)	Zm00001eb035910	TRAF44	103645153	TD and POZ domain-containing protein 3 (TRAF transcription factor) (Fragment)
A0A1D6KLJ5	A0A1D6KLJ5_MAIZE	unreviewed		Zea mays (Maize)	Zm00001eb038490			Structural maintenance of chromosomes protein
A0A1D6KLJ7	A0A1D6KLJ7_MAIZE	unreviewed		Zea mays (Maize)	Zm00001eb038490			Structural maintenance of chromosomes protein
A0A1D6KLJ9	A0A1D6KLJ9_MAIZE	unreviewed		Zea mays (Maize)	Zm00001eb038490			Structural maintenance of chromosomes (SMC) family protein
A0A1D6KLK1	A0A1D6KLK1_MAIZE	unreviewed		Zea mays (Maize)	Zm00001eb038490			Structural maintenance of chromosomes protein
A0A1D6KLK9	A0A1D6KLK9_MAIZE	unreviewed		Zea mays (Maize)	Zm00001eb038490			Structural maintenance of chromosomes protein
A0A1D6KLL0	A0A1D6KLL0_MAIZE	unreviewed		Zea mays (Maize)	Zm00001eb038490			Structural maintenance of chromosomes (SMC) family protein
A0A1D6KLL2	A0A1D6KLL2_MAIZE	unreviewed		Zea mays (Maize)	Zm00001eb038490			Structural maintenance of chromosomes protein
A0A1D6KLL5	A0A1D6KLL5_MAIZE	unreviewed		Zea mays (Maize)	Zm00001eb038490			Structural maintenance of chromosomes (SMC) family protein
A0A1D6KLM0	A0A1D6KLM0_MAIZE	unreviewed		Zea mays (Maize)	Zm00001eb038490			Structural maintenance of chromosomes (SMC) family protein
A0A1D6KLM3	A0A1D6KLM3_MAIZE	unreviewed		Zea mays (Maize)	Zm00001eb038490			Structural maintenance of chromosomes protein
A0A1D6KLM4	A0A1D6KLM4_MAIZE	unreviewed		Zea mays (Maize)	Zm00001eb038490			Structural maintenance of chromosomes protein
A0A1D6KLP3	A0A1D6KLP3_MAIZE	unreviewed		Zea mays (Maize)	Zm00001eb038490			Structural maintenance of chromosomes (SMC) family protein
A0A317Y8S1	A0A317Y8S1_MAIZE	unreviewed		Zea mays (Maize)	Zm00001eb038490			Structural maintenance of chromosomes protein 1
A0A1D6KLP5	A0A1D6KLP5_MAIZE	unreviewed	100277273	Zea mays (Maize)	Zm00001eb038500	100277273		ENTH/VHS family protein
A0A317YBA4	A0A317YBA4_MAIZE	unreviewed	SPCC794.11c	Zea mays (Maize)	Zm00001eb038500	SPCC794.11c		ENTH domain-containing protein C794.11c
B6TS18	B6TS18_MAIZE	unreviewed		Zea mays (Maize)	Zm00001eb038500			ENTH domain-containing protein
A0A1D6KLP6	A0A1D6KLP6_MAIZE	unreviewed		Zea mays (Maize)	Zm00001eb038510			PMP
A0A1D6KLP8	A0A1D6KLP8_MAIZE	unreviewed		Zea mays (Maize)	Zm00001eb038510			PMP
A0A1D6KLP9	A0A1D6KLP9_MAIZE	unreviewed		Zea mays (Maize)	Zm00001eb038510			PMP
A0A317Y940	A0A317Y940_MAIZE	unreviewed		Zea mays (Maize)	Zm00001eb038510			Uncharacterized protein
B6T6X0	B6T6X0_MAIZE	unreviewed	100276220	Zea mays (Maize)	Zm00001eb038510	100276220		PMP
A0A1D6KNC7	A0A1D6KNC7_MAIZE	unreviewed		Zea mays (Maize)	Zm00001eb040440			Uncharacterized protein
A0A1D6G347	A0A1D6G347_MAIZE	unreviewed		Zea mays (Maize)	Zm00001eb040450			Protein kinase superfamily protein
A0A317YAS8	A0A317YAS8_MAIZE	unreviewed	RIPK_2	Zea mays (Maize)	Zm00001eb040450	RIPK_2		Serine/threonine-protein kinase RIPK
B4F9S7	B4F9S7_MAIZE	unreviewed	100191690	Zea mays (Maize)	Zm00001eb040450	100191690		Root-specific kinase 1
B6ST24	B6ST24_MAIZE	unreviewed		Zea mays (Maize)	Zm00001eb040450			Protein kinase APK1B
C0PKX2	C0PKX2_MAIZE	unreviewed		Zea mays (Maize)	Zm00001eb040450			Protein kinase domain-containing protein
A0A1D6KNK6	A0A1D6KNK6_MAIZE	unreviewed		Zea mays (Maize)	Zm00001eb040790			4-coumarate--CoA ligase 1
A0A317Y237	A0A317Y237_MAIZE	unreviewed	4CL5	Zea mays (Maize)	Zm00001eb040790	4CL5		Putative 4-coumarate--CoA ligase 5
B4FAY2	B4FAY2_MAIZE	unreviewed		Zea mays (Maize)	Zm00001eb040790			AMP-binding domain-containing protein
A0A1D6KNK7	A0A1D6KNK7_MAIZE	unreviewed		Zea mays (Maize)	Zm00001eb040800			Adenylyl cyclase-associated protein
A0A317Y596	A0A317Y596_MAIZE	unreviewed	CAP1_2	Zea mays (Maize)	Zm00001eb040800	CAP1_2		Cyclase-associated protein 1
A0A1D6KNL1	A0A1D6KNL1_MAIZE	unreviewed		Zea mays (Maize)	Zm00001eb040860			Dentin sialophosphoprotein-related
A0A1D6KNL2	A0A1D6KNL2_MAIZE	unreviewed	103643251	Zea mays (Maize)	Zm00001eb040860	103643251		Dentin sialophosphoprotein-related
A0A1D6KNL3	A0A1D6KNL3_MAIZE	unreviewed		Zea mays (Maize)	Zm00001eb040860			Dentin sialophosphoprotein-related
A0A1D6KNL4	A0A1D6KNL4_MAIZE	unreviewed		Zea mays (Maize)	Zm00001eb040860			Dentin sialophosphoprotein-related
A0A1D6KNL5	A0A1D6KNL5_MAIZE	unreviewed		Zea mays (Maize)	Zm00001eb040860			Dentin sialophosphoprotein-related
A0A1D6PZN4	A0A1D6PZN4_MAIZE	unreviewed		Zea mays (Maize)	Zm00001eb040860			Dentin sialophosphoprotein-related
A0A317Y890	A0A317Y890_MAIZE	unreviewed		Zea mays (Maize)	Zm00001eb040860			Uncharacterized protein
A0A3L6F953	A0A3L6F953_MAIZE	unreviewed		Zea mays (Maize)	Zm00001eb040860			Uncharacterized protein
A0A1D6KNL9	A0A1D6KNL9_MAIZE	unreviewed		Zea mays (Maize)	Zm00001eb040870			Alpha/beta-Hydrolases superfamily protein
A0A1D6KNM0	A0A1D6KNM0_MAIZE	unreviewed		Zea mays (Maize)	Zm00001eb040870			Alpha/beta-Hydrolases superfamily protein
A0A1D6KNM1	A0A1D6KNM1_MAIZE	unreviewed		Zea mays (Maize)	Zm00001eb040870			Alpha/beta-Hydrolases superfamily protein
A0A1D6KNM3	A0A1D6KNM3_MAIZE	unreviewed		Zea mays (Maize)	Zm00001eb040870			Alpha/beta-Hydrolases superfamily protein
A0A1D6KNM4	A0A1D6KNM4_MAIZE	unreviewed		Zea mays (Maize)	Zm00001eb040870			Alpha/beta-Hydrolases superfamily protein
A0A1D6KNM5	A0A1D6KNM5_MAIZE	unreviewed		Zea mays (Maize)	Zm00001eb040870			Alpha/beta-Hydrolases superfamily protein
A0A317Y1V3	A0A317Y1V3_MAIZE	unreviewed		Zea mays (Maize)	Zm00001eb040870			Putative lipase ROG1
B6SYS8	B6SYS8_MAIZE	unreviewed	100281777	Zea mays (Maize)	Zm00001eb040870	100281777		Alpha/beta-Hydrolases superfamily protein (Serine esterase family protein)
B8A2Q7	B8A2Q7_MAIZE	unreviewed		Zea mays (Maize)	Zm00001eb040870			Uncharacterized protein
B8A3Q7	B8A3Q7_MAIZE	unreviewed		Zea mays (Maize)	Zm00001eb040870			DUF676 domain-containing protein
C0PF36	C0PF36_MAIZE	unreviewed	100281777	Zea mays (Maize)	Zm00001eb040870	100281777		DUF676 domain-containing protein
C0PG13	C0PG13_MAIZE	unreviewed		Zea mays (Maize)	Zm00001eb040870			DUF676 domain-containing protein
A0A1D6KNM6	A0A1D6KNM6_MAIZE	unreviewed	103643252	Zea mays (Maize)	Zm00001eb040880	103643252		Protein ecdysoneless-like protein
A0A1D6KNM7	A0A1D6KNM7_MAIZE	unreviewed		Zea mays (Maize)	Zm00001eb040880			Protein ecdysoneless-like protein
A0A317Y2A1	A0A317Y2A1_MAIZE	unreviewed		Zea mays (Maize)	Zm00001eb040880			Protein ecdysoneless
A0A1D6E5V4	A0A1D6E5V4_MAIZE	unreviewed		Zea mays (Maize)	Zm00001eb042870			Cytokinin-O-glucosyltransferase 1
A0A3L6D6D6	A0A3L6D6D6_MAIZE	unreviewed		Zea mays (Maize)	Zm00001eb042870			Uncharacterized protein
B4FSI4	B4FSI4_MAIZE	unreviewed		Zea mays (Maize)	Zm00001eb042870			Glycosyltransferase (EC 2.4.1.-)
C0P7U4	C0P7U4_MAIZE	unreviewed	100382444	Zea mays (Maize)	Zm00001eb042870	100382444		Glycosyltransferase (EC 2.4.1.-)
C4J5L2	C4J5L2_MAIZE	unreviewed		Zea mays (Maize)	Zm00001eb042870			Glycosyltransferase (EC 2.4.1.-)
A0A1D6KQB6	A0A1D6KQB6_MAIZE	unreviewed		Zea mays (Maize)	Zm00001eb042890			Uncharacterized protein
A0A1D6KQB9	A0A1D6KQB9_MAIZE	unreviewed		Zea mays (Maize)	Zm00001eb042890			Uncharacterized protein
A0A1D6KQC1	A0A1D6KQC1_MAIZE	unreviewed		Zea mays (Maize)	Zm00001eb042890			Uncharacterized protein
A0A1D6KQC3	A0A1D6KQC3_MAIZE	unreviewed	103643343	Zea mays (Maize)	Zm00001eb042890	103643343		Uncharacterized protein
A0A1D6KQC6	A0A1D6KQC6_MAIZE	unreviewed		Zea mays (Maize)	Zm00001eb042890			Uncharacterized protein
A0A1D6KQC7	A0A1D6KQC7_MAIZE	unreviewed		Zea mays (Maize)	Zm00001eb042890			Uncharacterized protein
A0A317YLK8	A0A317YLK8_MAIZE	unreviewed	RPM1_8	Zea mays (Maize)	Zm00001eb042890	RPM1_8		Disease resistance protein RPM1
A0A1D6KQE2	A0A1D6KQE2_MAIZE	unreviewed	103643345	Zea mays (Maize)	Zm00001eb042960	103643345		Two-component response regulator ARR16
A0A317YE07	A0A317YE07_MAIZE	unreviewed	RR12	Zea mays (Maize)	Zm00001eb042960	RR12		Two-component response regulator ORR12
A0A1D6I1I4	A0A1D6I1I4_MAIZE	unreviewed		Zea mays (Maize)	Zm00001eb042970			Plastid phosphate/phosphoenolpyruvate translocator2
A0A1D6KQE5	A0A1D6KQE5_MAIZE	unreviewed		Zea mays (Maize)	Zm00001eb042970			Phosphoenolpyruvate/phosphate translocator 1 chloroplastic
A0A317YJK6	A0A317YJK6_MAIZE	unreviewed	PPT2_1	Zea mays (Maize)	Zm00001eb042970	PPT2_1		Phosphoenolpyruvate/phosphate translocator 2, chloroplastic
B6TKB3	B6TKB3_MAIZE	unreviewed		Zea mays (Maize)	Zm00001eb042970			Triose phosphate/phosphate translocator, non-green plastid,chloroplast
C0P317	C0P317_MAIZE	unreviewed	100283648	Zea mays (Maize)	Zm00001eb042970	100283648		Phosphoenolpyruvate/phosphate translocator 1 chloroplastic
A0A1D6KR41	A0A1D6KR41_MAIZE	unreviewed	103645327	Zea mays (Maize)	Zm00001eb043820	103645327		HR-like lesion-inducing protein-related
A0A3L6F723	A0A3L6F723_MAIZE	unreviewed	Os03g0283600_9	Zea mays (Maize)	Zm00001eb043820	Os03g0283600_9		Cardiolipin synthase (CMP-forming), mitochondrial
A0A1D6P7S4	A0A1D6P7S4_MAIZE	unreviewed		Zea mays (Maize)	Zm00001eb043830			Calmodulin-binding transcription activator 2
A0A3L6ESD1	A0A3L6ESD1_MAIZE	unreviewed	Os03g0283600_8	Zea mays (Maize)	Zm00001eb043830	Os03g0283600_8		Cardiolipin synthase (CMP-forming), mitochondrial
A0A3L6FKK4	A0A3L6FKK4_MAIZE	unreviewed	Os03g0283600_3	Zea mays (Maize)	Zm00001eb043830	Os03g0283600_3		Cardiolipin synthase (CMP-forming), mitochondrial
A0A1D6KR43	A0A1D6KR43_MAIZE	unreviewed		Zea mays (Maize)	Zm00001eb043850			CRP3-Cysteine-rich family protein expressed
A0A317YF46	A0A317YF46_MAIZE	unreviewed		Zea mays (Maize)	Zm00001eb043850			Uncharacterized protein
B6SXD9	B6SXD9_MAIZE	unreviewed		Zea mays (Maize)	Zm00001eb043850			CRP3-Cysteine-rich family protein expressed
A0A317Y217	A0A317Y217_MAIZE	unreviewed		Zea mays (Maize)	Zm00001eb043880			F-box domain-containing protein
B6TBN8	B6TBN8_MAIZE	unreviewed		Zea mays (Maize)	Zm00001eb043880			F-box domain containing protein
C0PGZ9	C0PGZ9_MAIZE	unreviewed	100282821	Zea mays (Maize)	Zm00001eb043880	100282821		F-box domain containing protein
C4JBG5	C4JBG5_MAIZE	unreviewed		Zea mays (Maize)	Zm00001eb043880			Uncharacterized protein
A0A1D6KR49	A0A1D6KR49_MAIZE	unreviewed		Zea mays (Maize)	Zm00001eb043890			Uncharacterized protein
A0A317YHL3	A0A317YHL3_MAIZE	unreviewed		Zea mays (Maize)	Zm00001eb043890			Uncharacterized protein
A0A1D6KR50	A0A1D6KR50_MAIZE	unreviewed		Zea mays (Maize)	Zm00001eb043900			Plant invertase/pectin methylesterase inhibitor superfamily protein
A0A317Y789	A0A317Y789_MAIZE	unreviewed	PMEI7	Zea mays (Maize)	Zm00001eb043900	PMEI7		Pectinesterase inhibitor 7
B6UDU5	B6UDU5_MAIZE	unreviewed		Zea mays (Maize)	Zm00001eb043900			Ripening-related protein-like
A0A1D6KR52	A0A1D6KR52_MAIZE	unreviewed		Zea mays (Maize)	Zm00001eb043910			Uncharacterized protein
A0A317Y9U8	A0A317Y9U8_MAIZE	unreviewed		Zea mays (Maize)	Zm00001eb043910			Uncharacterized protein
B6T7T9	B6T7T9_MAIZE	unreviewed		Zea mays (Maize)	Zm00001eb043910			Uncharacterized protein
C4J739	C4J739_MAIZE	unreviewed		Zea mays (Maize)	Zm00001eb043910			Uncharacterized protein
A0A1D6GNE4	A0A1D6GNE4_MAIZE	unreviewed		Zea mays (Maize)	Zm00001eb043920			Methionine aminopeptidase
A0A1D6GNF0	A0A1D6GNF0_MAIZE	unreviewed		Zea mays (Maize)	Zm00001eb043920			Methionine aminopeptidase
A0A1D6KR54	A0A1D6KR54_MAIZE	unreviewed		Zea mays (Maize)	Zm00001eb043920			Methionine aminopeptidase 1A
A0A317Y3T2	A0A317Y3T2_MAIZE	unreviewed	MAP1A_0	Zea mays (Maize)	Zm00001eb043920	MAP1A_0		Methionine aminopeptidase (EC 3.4.11.18)
B4FZK6	B4FZK6_MAIZE	unreviewed		Zea mays (Maize)	Zm00001eb043920			Methionine aminopeptidase (EC 3.4.11.18)
B6TDI9	B6TDI9_MAIZE	unreviewed		Zea mays (Maize)	Zm00001eb043920			Methionine aminopeptidase (EC 3.4.11.18)
A0A3L6D5X8	A0A3L6D5X8_MAIZE	unreviewed	MSI1_3	Zea mays (Maize)	Zm00001eb050670	MSI1_3		Histone-binding protein MSI1
A0A1D6KYS5	A0A1D6KYS5_MAIZE	unreviewed		Zea mays (Maize)	Zm00001eb052030			Uncharacterized protein
A0A317Y8N8	A0A317Y8N8_MAIZE	unreviewed		Zea mays (Maize)	Zm00001eb052050			Uncharacterized protein
B6U1Q5	B6U1Q5_MAIZE	unreviewed		Zea mays (Maize)	Zm00001eb052050			Uncharacterized protein
C0PD78	C0PD78_MAIZE	unreviewed	100277915	Zea mays (Maize)	Zm00001eb052050	100277915		Uncharacterized protein
A0A1D6GKK4	A0A1D6GKK4_MAIZE	unreviewed		Zea mays (Maize)	Zm00001eb052070			Growth-regulating factor
A0A1D6KYT0	A0A1D6KYT0_MAIZE	unreviewed		Zea mays (Maize)	Zm00001eb052070			Growth-regulating factor
A0A317Y6N6	A0A317Y6N6_MAIZE	unreviewed		Zea mays (Maize)	Zm00001eb052070			Growth-regulating factor
A0A3L6EPE3	A0A3L6EPE3_MAIZE	unreviewed	GRF9_1	Zea mays (Maize)	Zm00001eb052070	GRF9_1		Growth-regulating factor
A5HEG7	A5HEG7_MAIZE	unreviewed	GRF8	Zea mays (Maize)	Zm00001eb052070	GRF8		Growth-regulating factor
A5HEH2	A5HEH2_MAIZE	unreviewed	GRF13	Zea mays (Maize)	Zm00001eb052070	GRF13		Growth-regulating factor
B6T7R7	B6T7R7_MAIZE	unreviewed		Zea mays (Maize)	Zm00001eb052070			Growth-regulating factor
B6TAI6	B6TAI6_MAIZE	unreviewed		Zea mays (Maize)	Zm00001eb052070			Growth-regulating factor
C4J2M4	C4J2M4_MAIZE	unreviewed		Zea mays (Maize)	Zm00001eb052070			Growth-regulating factor
F1DJY8	F1DJY8_MAIZE	unreviewed		Zea mays (Maize)	Zm00001eb052070			Growth-regulating factor (Fragment)
A0A1D6KYT4	A0A1D6KYT4_MAIZE	unreviewed		Zea mays (Maize)	Zm00001eb052080			CBS domain containing protein
A0A1D6KYT6	A0A1D6KYT6_MAIZE	unreviewed		Zea mays (Maize)	Zm00001eb052080			CBS domain containing protein
A0A1D6KYT7	A0A1D6KYT7_MAIZE	unreviewed		Zea mays (Maize)	Zm00001eb052080			CBS domain containing protein
A0A1D6KYT9	A0A1D6KYT9_MAIZE	unreviewed		Zea mays (Maize)	Zm00001eb052080			CBS domain containing protein
A0A317Y5S7	A0A317Y5S7_MAIZE	unreviewed	CBSDUF3	Zea mays (Maize)	Zm00001eb052080	CBSDUF3		DUF21 domain-containing protein
B6TF42	B6TF42_MAIZE	unreviewed		Zea mays (Maize)	Zm00001eb052080			CBS domain containing protein
C0P3F8	C0P3F8_MAIZE	unreviewed		Zea mays (Maize)	Zm00001eb052080			CBS domain containing protein
A0A1D6DXB0	A0A1D6DXB0_MAIZE	unreviewed	100272475	Zea mays (Maize)	Zm00001eb069390	100272475		Eukaryotic translation initiation factor 3 subunit C (eIF3c) (Eukaryotic translation initiation factor 3 subunit 8) (eIF3 p110)
A0A1D6DXC2	A0A1D6DXC2_MAIZE	unreviewed		Zea mays (Maize)	Zm00001eb069390			Eukaryotic translation initiation factor 3 subunit C
A0A1D6DXD3	A0A1D6DXD3_MAIZE	unreviewed		Zea mays (Maize)	Zm00001eb069390			Eukaryotic translation initiation factor 3 subunit C
A0A1D6DXG3	A0A1D6DXG3_MAIZE	unreviewed		Zea mays (Maize)	Zm00001eb069390			Eukaryotic translation initiation factor 3 subunit C
A0A1D6DXG9	A0A1D6DXG9_MAIZE	unreviewed		Zea mays (Maize)	Zm00001eb069390			Eukaryotic translation initiation factor 3 subunit C
A0A1D6DXE9	A0A1D6DXE9_MAIZE	unreviewed	103645884	Zea mays (Maize)	Zm00001eb069400	103645884		Protein kinase superfamily protein
A0A1D6DXF0	A0A1D6DXF0_MAIZE	unreviewed		Zea mays (Maize)	Zm00001eb069400			Protein kinase superfamily protein
A0A3L6G383	A0A3L6G383_MAIZE	unreviewed		Zea mays (Maize)	Zm00001eb069400			G-type lectin S-receptor-like serine/threonine-protein kinase
A0A3L6G4A4	A0A3L6G4A4_MAIZE	unreviewed		Zea mays (Maize)	Zm00001eb069400			Protein kinase domain-containing protein
A0A1D6DXF1	A0A1D6DXF1_MAIZE	unreviewed		Zea mays (Maize)	Zm00001eb069410			Receptor-like serine/threonine-protein kinase (EC 2.7.11.1)
A0A3L6DU79	A0A3L6DU79_MAIZE	unreviewed	SD18_0	Zea mays (Maize)	Zm00001eb069410	SD18_0		Receptor-like serine/threonine-protein kinase (EC 2.7.11.1)
A0A3L6FWI8	A0A3L6FWI8_MAIZE	unreviewed	SD18_10	Zea mays (Maize)	Zm00001eb069410	SD18_10		Receptor-like serine/threonine-protein kinase (EC 2.7.11.1)
B7ZXB0	B7ZXB0_MAIZE	unreviewed		Zea mays (Maize)	Zm00001eb069410			Uncharacterized protein
C0HEN9	C0HEN9_MAIZE	unreviewed		Zea mays (Maize)	Zm00001eb069410			Non-specific serine/threonine protein kinase (EC 2.7.11.1)
A0A1D6DXC1	A0A1D6DXC1_MAIZE	unreviewed		Zea mays (Maize)	Zm00001eb069420			Eukaryotic translation initiation factor 3 subunit C (eIF3c) (Eukaryotic translation initiation factor 3 subunit 8) (eIF3 p110)
A0A1D6DXF6	A0A1D6DXF6_MAIZE	unreviewed		Zea mays (Maize)	Zm00001eb069420			Eukaryotic translation initiation factor 3 subunit C (eIF3c) (Eukaryotic translation initiation factor 3 subunit 8) (eIF3 p110)
A0A1D6DXG8	A0A1D6DXG8_MAIZE	unreviewed		Zea mays (Maize)	Zm00001eb069420			Eukaryotic translation initiation factor 3 subunit C (eIF3c) (Eukaryotic translation initiation factor 3 subunit 8) (eIF3 p110)
A0A1D6DXH3	A0A1D6DXH3_MAIZE	unreviewed		Zea mays (Maize)	Zm00001eb069420			Eukaryotic translation initiation factor 3 subunit C
A0A3L6G221	A0A3L6G221_MAIZE	unreviewed	TIF3C1_3	Zea mays (Maize)	Zm00001eb069420	TIF3C1_3		Eukaryotic translation initiation factor 3 subunit C (eIF3c) (Eukaryotic translation initiation factor 3 subunit 8) (eIF3 p110)
A0A3L6G6T3	A0A3L6G6T3_MAIZE	unreviewed	TIF3C1_2	Zea mays (Maize)	Zm00001eb069420	TIF3C1_2		Eukaryotic translation initiation factor 3 subunit C (eIF3c) (Eukaryotic translation initiation factor 3 subunit 8) (eIF3 p110)
A0A1D6DXH6	A0A1D6DXH6_MAIZE	unreviewed		Zea mays (Maize)	Zm00001eb069460			G-type lectin S-receptor-like serine/threonine-protein kinase B120
A0A3L6G2G8	A0A3L6G2G8_MAIZE	unreviewed	RKS1_2	Zea mays (Maize)	Zm00001eb069460	RKS1_2		G-type lectin S-receptor-like serine/threonine-protein kinase RKS1
A0A1D6DXH8	A0A1D6DXH8_MAIZE	unreviewed		Zea mays (Maize)	Zm00001eb069480			Receptor-like serine/threonine-protein kinase SD1-8
A0A3L6G1E6	A0A3L6G1E6_MAIZE	unreviewed	SD18_4	Zea mays (Maize)	Zm00001eb069480	SD18_4		Receptor-like serine/threonine-protein kinase SD1-8
A0A3L6FWU6	A0A3L6FWU6_MAIZE	unreviewed	LHT2_6	Zea mays (Maize)	Zm00001eb069510	LHT2_6		Lysine histidine transporter 2
B6TF11	B6TF11_MAIZE	unreviewed	100283144	Zea mays (Maize)	Zm00001eb069510	100283144		AATL2 (Lysine histidine transporter 2)
A0A1D6DXI6	A0A1D6DXI6_MAIZE	unreviewed	103645892	Zea mays (Maize)	Zm00001eb069540	103645892		F-box only protein 7
A0A1D6DXN2	A0A1D6DXN2_MAIZE	unreviewed		Zea mays (Maize)	Zm00001eb069540			F-box only protein 7
A0A1D6DXN7	A0A1D6DXN7_MAIZE	unreviewed		Zea mays (Maize)	Zm00001eb069540			F-box only protein 7
A0A1D6DXQ7	A0A1D6DXQ7_MAIZE	unreviewed		Zea mays (Maize)	Zm00001eb069540			F-box only protein 7
A0A1D6HDN2	A0A1D6HDN2_MAIZE	unreviewed		Zea mays (Maize)	Zm00001eb069540			F-box only protein 7
A0A3L6G385	A0A3L6G385_MAIZE	unreviewed	ABCI1_4	Zea mays (Maize)	Zm00001eb069540	ABCI1_4		ABC transporter I family member 1
A0A3L6G4D9	A0A3L6G4D9_MAIZE	unreviewed	SKIP23_0	Zea mays (Maize)	Zm00001eb069540	SKIP23_0		F-box protein SKIP23
B4FXI4	B4FXI4_MAIZE	unreviewed		Zea mays (Maize)	Zm00001eb069540			ABC transporter I family member 1
A0A1D6DXI7	A0A1D6DXI7_MAIZE	unreviewed		Zea mays (Maize)	Zm00001eb069550			G-type lectin S-receptor-like serine/threonine-protein kinase B120
A0A3L6G196	A0A3L6G196_MAIZE	unreviewed		Zea mays (Maize)	Zm00001eb069550			G-type lectin S-receptor-like serine/threonine-protein kinase RKS1
A0A317YFR1	A0A317YFR1_MAIZE	unreviewed		Zea mays (Maize)	Zm00001eb070440			Uncharacterized protein
A0A3L6D7I6	A0A3L6D7I6_MAIZE	unreviewed		Zea mays (Maize)	Zm00001eb070440			Uncharacterized protein
A0A3L6E4N0	A0A3L6E4N0_MAIZE	unreviewed		Zea mays (Maize)	Zm00001eb070440			Uncharacterized protein
A0A3L6ETS2	A0A3L6ETS2_MAIZE	unreviewed		Zea mays (Maize)	Zm00001eb070440			Uncharacterized protein
A0A3L6FJY6	A0A3L6FJY6_MAIZE	unreviewed		Zea mays (Maize)	Zm00001eb070440			Uncharacterized protein
A0A1D6DZ77	A0A1D6DZ77_MAIZE	unreviewed		Zea mays (Maize)	Zm00001eb070450			Putative receptor-like protein kinase
A0A1D6QAZ4	A0A1D6QAZ4_MAIZE	unreviewed		Zea mays (Maize)	Zm00001eb070450			Receptor-like serine/threonine-protein kinase ALE2
A0A3L6FSD5	A0A3L6FSD5_MAIZE	unreviewed	At1g30570_1	Zea mays (Maize)	Zm00001eb070450	At1g30570_1		Putative receptor-like protein kinase
A0A1D6DZ78	A0A1D6DZ78_MAIZE	unreviewed		Zea mays (Maize)	Zm00001eb070460			Protein kinase superfamily protein
A0A1D6DZ79	A0A1D6DZ79_MAIZE	unreviewed	100273687	Zea mays (Maize)	Zm00001eb070460	100273687		Protein kinase superfamily protein
A0A3L6FXA8	A0A3L6FXA8_MAIZE	unreviewed		Zea mays (Maize)	Zm00001eb070460			Protein kinase domain-containing protein
A0A3L6FXC6	A0A3L6FXC6_MAIZE	unreviewed		Zea mays (Maize)	Zm00001eb070460			Putative LRR receptor-like serine/threonine-protein kinase
B6U5V2	B6U5V2_MAIZE	unreviewed		Zea mays (Maize)	Zm00001eb070460			Serine/threonine-protein kinase receptor
A0A1D6DZ84	A0A1D6DZ84_MAIZE	unreviewed		Zea mays (Maize)	Zm00001eb070480			F-box/kelch-repeat protein
A0A1D6F755	A0A1D6F755_MAIZE	unreviewed		Zea mays (Maize)	Zm00001eb070480			F-box/kelch-repeat protein
A0A1D6I0M2	A0A1D6I0M2_MAIZE	unreviewed		Zea mays (Maize)	Zm00001eb070480			F-box/kelch-repeat protein
A0A3L6FY97	A0A3L6FY97_MAIZE	unreviewed	At5g60570_0	Zea mays (Maize)	Zm00001eb070480	At5g60570_0		F-box/kelch-repeat protein
B4F9L7	B4F9L7_MAIZE	unreviewed	100274214	Zea mays (Maize)	Zm00001eb070480	100274214		F-box/kelch-repeat protein
B4F9N2	B4F9N2_MAIZE	unreviewed	100274214	Zea mays (Maize)	Zm00001eb070480	100274214		F-box/kelch-repeat protein
A0A1D6EHP0	A0A1D6EHP0_MAIZE	unreviewed		Zea mays (Maize)	Zm00001eb091800			C2H2-like zinc finger protein
A0A3L6G4W5	A0A3L6G4W5_MAIZE	unreviewed		Zea mays (Maize)	Zm00001eb091800			C2H2-type domain-containing protein
C0PNV1	C0PNV1_MAIZE	unreviewed		Zea mays (Maize)	Zm00001eb091800			C2H2-type domain-containing protein
A0A1D6MIH4	A0A1D6MIH4_MAIZE	unreviewed		Zea mays (Maize)	Zm00001eb092010			ARM repeat superfamily protein
A0A3L6EII5	A0A3L6EII5_MAIZE	unreviewed		Zea mays (Maize)	Zm00001eb092030			Uncharacterized protein
A0A3L6ERS3	A0A3L6ERS3_MAIZE	unreviewed		Zea mays (Maize)	Zm00001eb092030			Uncharacterized protein
C0HI91	C0HI91_MAIZE	unreviewed		Zea mays (Maize)	Zm00001eb094100			Uncharacterized protein
A0A3L6F892	A0A3L6F892_MAIZE	unreviewed		Zea mays (Maize)	Zm00001eb094120			DUF295 domain-containing protein
A0A3L6G1P6	A0A3L6G1P6_MAIZE	unreviewed		Zea mays (Maize)	Zm00001eb094120			DUF295 domain-containing protein
C0PMD3	C0PMD3_MAIZE	unreviewed	100384195	Zea mays (Maize)	Zm00001eb094120	100384195		DUF295 domain-containing protein
A0A1D6EL81	A0A1D6EL81_MAIZE	unreviewed		Zea mays (Maize)	Zm00001eb095240			Eukaryotic translation initiation factor 3 subunit E (eIF3e) (Eukaryotic translation initiation factor 3 subunit 6)
A0A1D6EL82	A0A1D6EL82_MAIZE	unreviewed		Zea mays (Maize)	Zm00001eb095240			Eukaryotic translation initiation factor 3 subunit E
A0A1D6EL83	A0A1D6EL83_MAIZE	unreviewed		Zea mays (Maize)	Zm00001eb095240			Eukaryotic translation initiation factor 3 subunit E (eIF3e) (Eukaryotic translation initiation factor 3 subunit 6)
A0A1D6K802	A0A1D6K802_MAIZE	unreviewed		Zea mays (Maize)	Zm00001eb095240			Eukaryotic translation initiation factor 3 subunit E
A0A3L6E099	A0A3L6E099_MAIZE	unreviewed	TIF3E1_0	Zea mays (Maize)	Zm00001eb095240	TIF3E1_0		Eukaryotic translation initiation factor 3 subunit E
A0A3L6FZY3	A0A3L6FZY3_MAIZE	unreviewed	TIF3E1_6	Zea mays (Maize)	Zm00001eb095240	TIF3E1_6		Eukaryotic translation initiation factor 3 subunit E (eIF3e) (Eukaryotic translation initiation factor 3 subunit 6)
B6TRV3	B6TRV3_MAIZE	unreviewed		Zea mays (Maize)	Zm00001eb095240			Eukaryotic translation initiation factor 3 subunit E (eIF3e) (Eukaryotic translation initiation factor 3 subunit 6)
C0P7L2	C0P7L2_MAIZE	unreviewed		Zea mays (Maize)	Zm00001eb095240			Eukaryotic translation initiation factor 3 subunit E (eIF3e) (Eukaryotic translation initiation factor 3 subunit 6)
A0A3L6FY98	A0A3L6FY98_MAIZE	unreviewed		Zea mays (Maize)	Zm00001eb098410			Ubiquitin domain-containing protein 2
B6UG62	B6UG62_MAIZE	unreviewed	100286222	Zea mays (Maize)	Zm00001eb098410	100286222		Dendritic cell-derived ubiquitin-like protein
A0A1D6ERD6	A0A1D6ERD6_MAIZE	unreviewed		Zea mays (Maize)	Zm00001eb100710			Uncharacterized protein
A0A3L6FRP8	A0A3L6FRP8_MAIZE	unreviewed		Zea mays (Maize)	Zm00001eb100710			Uncharacterized protein
A0A1D6ERL5	A0A1D6ERL5_MAIZE	unreviewed		Zea mays (Maize)	Zm00001eb101120			D-type cyclin
A0A1D6ERL6	A0A1D6ERL6_MAIZE	unreviewed	103647502	Zea mays (Maize)	Zm00001eb101120	103647502		D-type cyclin
A0A3L6DAY3	A0A3L6DAY3_MAIZE	unreviewed	CYCD4-1_0	Zea mays (Maize)	Zm00001eb101120	CYCD4-1_0		Cyclin-D4-1
A0A3L6FW68	A0A3L6FW68_MAIZE	unreviewed	CYCD4-1_3	Zea mays (Maize)	Zm00001eb101120	CYCD4-1_3		Cyclin-D4-1
C4J0Y8	C4J0Y8_MAIZE	unreviewed		Zea mays (Maize)	Zm00001eb101120			Uncharacterized protein
Q8S521	Q8S521_MAIZE	unreviewed	cycD4	Zea mays (Maize)	Zm00001eb101120	cycD4		D-type cyclin (Fragment)
A0A1D6ERL9	A0A1D6ERL9_MAIZE	unreviewed		Zea mays (Maize)	Zm00001eb101160			Probable purine permease
A0A3L6G0K7	A0A3L6G0K7_MAIZE	unreviewed	PUP3_3	Zea mays (Maize)	Zm00001eb101160	PUP3_3		Probable purine permease
B6SKP0	B6SKP0_MAIZE	unreviewed		Zea mays (Maize)	Zm00001eb101160			Probable purine permease
A0A1D6ERM2	A0A1D6ERM2_MAIZE	unreviewed		Zea mays (Maize)	Zm00001eb101170			Purine permease 3
A0A1D6I662	A0A1D6I662_MAIZE	unreviewed		Zea mays (Maize)	Zm00001eb101170			Purine permease 3
A0A3L6G2Q4	A0A3L6G2Q4_MAIZE	unreviewed	PUP3_4	Zea mays (Maize)	Zm00001eb101170	PUP3_4		Probable purine permease
B4FET6	B4FET6_MAIZE	unreviewed	100193377	Zea mays (Maize)	Zm00001eb101170	100193377		Probable purine permease
C4J679	C4J679_MAIZE	unreviewed	100193377	Zea mays (Maize)	Zm00001eb101170	100193377		Probable purine permease
A0A3L6G0M0	A0A3L6G0M0_MAIZE	unreviewed	VIP1_4	Zea mays (Maize)	Zm00001eb103000	VIP1_4		Transcription factor VIP1
C4JAX3	C4JAX3_MAIZE	unreviewed	100502386	Zea mays (Maize)	Zm00001eb103000	100502386	bZIP46	BZIP transcription factor (Basic-leucine zipper (BZIP) transcription factor family protein)
A0A1D6ET93	A0A1D6ET93_MAIZE	unreviewed		Zea mays (Maize)	Zm00001eb103010			Uncharacterized protein
A0A3L6G2X0	A0A3L6G2X0_MAIZE	unreviewed		Zea mays (Maize)	Zm00001eb103010			Uncharacterized protein
B6SQK1	B6SQK1_MAIZE	unreviewed		Zea mays (Maize)	Zm00001eb103010			Uncharacterized protein
B6U3A4	B6U3A4_MAIZE	unreviewed		Zea mays (Maize)	Zm00001eb103010			Uncharacterized protein
A0A096ST30	A0A096ST30_MAIZE	unreviewed	103647597	Zea mays (Maize)	Zm00001eb103020	103647597		Ycf49-like protein
A0A3L6G233	A0A3L6G233_MAIZE	unreviewed		Zea mays (Maize)	Zm00001eb103020			Ycf49-like protein
A0A1D6ET96	A0A1D6ET96_MAIZE	unreviewed	100193061	Zea mays (Maize)	Zm00001eb103030	100193061		RNA helicase (EC 3.6.4.13)
A0A1D6ET98	A0A1D6ET98_MAIZE	unreviewed		Zea mays (Maize)	Zm00001eb103030			DEAD-box ATP-dependent RNA helicase 7
A0A1D6I8W9	A0A1D6I8W9_MAIZE	unreviewed		Zea mays (Maize)	Zm00001eb103030			DEAD-box ATP-dependent RNA helicase 7
A0A3L6FWG5	A0A3L6FWG5_MAIZE	unreviewed		Zea mays (Maize)	Zm00001eb103030			RNA helicase (EC 3.6.4.13)
A0A1D6F563	A0A1D6F563_MAIZE	unreviewed	100217316	Zea mays (Maize)	Zm00001eb112400	100217316		La-related protein 6B
A0A3L6FVR7	A0A3L6FVR7_MAIZE	unreviewed	LARP6B_2	Zea mays (Maize)	Zm00001eb112400	LARP6B_2		La-related protein 6B
B4FMJ1	B4FMJ1_MAIZE	unreviewed		Zea mays (Maize)	Zm00001eb112400			Uncharacterized protein
A0A1D6F564	A0A1D6F564_MAIZE	unreviewed		Zea mays (Maize)	Zm00001eb112430			ARGOS homolog3
A0A3L6G4K6	A0A3L6G4K6_MAIZE	unreviewed		Zea mays (Maize)	Zm00001eb112430			Uncharacterized protein
B6TS57	B6TS57_MAIZE	unreviewed	ZAR3	Zea mays (Maize)	Zm00001eb112430	ZAR3		Argos-like protein (Auxin regulated gene involved in organ size 3) (Auxin-inducible protein)
A0A1D6HUA6	A0A1D6HUA6_MAIZE	unreviewed		Zea mays (Maize)	Zm00001eb112450			Associate of C-myc
A0A1D6IB91	A0A1D6IB91_MAIZE	unreviewed		Zea mays (Maize)	Zm00001eb112450			CBP60G (CAM-BINDING PROTEIN 60-LIKE.G)
A0A3L6G3R9	A0A3L6G3R9_MAIZE	unreviewed		Zea mays (Maize)	Zm00001eb112450			Uncharacterized protein
A0A1D6F5L3	A0A1D6F5L3_MAIZE	unreviewed	100281016	Zea mays (Maize)	Zm00001eb112930	100281016		HVA22-like protein
A0A1D6F5L4	A0A1D6F5L4_MAIZE	unreviewed		Zea mays (Maize)	Zm00001eb112930			HVA22-like protein
A0A3L6FR47	A0A3L6FR47_MAIZE	unreviewed	HVA22_3	Zea mays (Maize)	Zm00001eb112930	HVA22_3		HVA22-like protein
B6SRB1	B6SRB1_MAIZE	unreviewed	100281016	Zea mays (Maize)	Zm00001eb112930	100281016		HVA22-like protein
A0A1D6F5L8	A0A1D6F5L8_MAIZE	unreviewed		Zea mays (Maize)	Zm00001eb112970			Uncharacterized protein
A0A1R3P0I7	A0A1R3P0I7_MAIZE	unreviewed	100275307	Zea mays (Maize)	Zm00001eb112970	100275307		Uncharacterized protein
A0A3L6FRY9	A0A3L6FRY9_MAIZE	unreviewed		Zea mays (Maize)	Zm00001eb112970			Uncharacterized protein
A0A3L6FX91	A0A3L6FX91_MAIZE	unreviewed		Zea mays (Maize)	Zm00001eb112970			Uncharacterized protein
B6SR55	B6SR55_MAIZE	unreviewed		Zea mays (Maize)	Zm00001eb112970			Uncharacterized protein
B6T0K4	B6T0K4_MAIZE	unreviewed		Zea mays (Maize)	Zm00001eb112970			Uncharacterized protein
B6UI21	B6UI21_MAIZE	unreviewed	100279126	Zea mays (Maize)	Zm00001eb172810	100279126		Uncharacterized protein
A0A1D6PX88	A0A1D6PX88_MAIZE	unreviewed		Zea mays (Maize)	Zm00001eb174090			Phospholipase SGR2
A0A1D6PX89	A0A1D6PX89_MAIZE	unreviewed	100216911	Zea mays (Maize)	Zm00001eb174090	100216911		Phospholipase SGR2
A0A1D6PX91	A0A1D6PX91_MAIZE	unreviewed		Zea mays (Maize)	Zm00001eb174090			Phospholipase SGR2
A0A1D6PX92	A0A1D6PX92_MAIZE	unreviewed		Zea mays (Maize)	Zm00001eb174090			Phospholipase SGR2
A0A1D6PX93	A0A1D6PX93_MAIZE	unreviewed		Zea mays (Maize)	Zm00001eb174090			Phospholipase SGR2
A0A1D6PX94	A0A1D6PX94_MAIZE	unreviewed		Zea mays (Maize)	Zm00001eb174090			Phospholipase SGR2
A0A1D6PX99	A0A1D6PX99_MAIZE	unreviewed		Zea mays (Maize)	Zm00001eb174090			Phospholipase SGR2
A0A1D6PXA1	A0A1D6PXA1_MAIZE	unreviewed		Zea mays (Maize)	Zm00001eb174090			Phospholipase SGR2
A0A1D6PXA3	A0A1D6PXA3_MAIZE	unreviewed		Zea mays (Maize)	Zm00001eb174090			Phospholipase SGR2
A0A1D6PXA4	A0A1D6PXA4_MAIZE	unreviewed		Zea mays (Maize)	Zm00001eb174090			Phospholipase SGR2
A0A3L6F3S5	A0A3L6F3S5_MAIZE	unreviewed		Zea mays (Maize)	Zm00001eb174090			Phospholipase SGR2
A0A1D6PXB1	A0A1D6PXB1_MAIZE	unreviewed		Zea mays (Maize)	Zm00001eb174100			RING-type E3 ubiquitin transferase (EC 2.3.2.27)
A0A1D6PXB5	A0A1D6PXB5_MAIZE	unreviewed	103653150	Zea mays (Maize)	Zm00001eb174100	103653150		RING-type E3 ubiquitin transferase (EC 2.3.2.27)
A0A1D6PXB6	A0A1D6PXB6_MAIZE	unreviewed		Zea mays (Maize)	Zm00001eb174100			RING-type E3 ubiquitin transferase (EC 2.3.2.27)
A0A1D6PXB7	A0A1D6PXB7_MAIZE	unreviewed	103653150	Zea mays (Maize)	Zm00001eb174100	103653150		RING-type E3 ubiquitin transferase (EC 2.3.2.27)
A0A3L6F5I3	A0A3L6F5I3_MAIZE	unreviewed	PUB4_7	Zea mays (Maize)	Zm00001eb174100	PUB4_7		RING-type E3 ubiquitin transferase (EC 2.3.2.27)
A0A1D6PXC0	A0A1D6PXC0_MAIZE	unreviewed		Zea mays (Maize)	Zm00001eb174120			Polyneuridine-aldehyde esterase
A0A1D6PXC1	A0A1D6PXC1_MAIZE	unreviewed		Zea mays (Maize)	Zm00001eb174120			Polyneuridine-aldehyde esterase
A0A3L6F3J1	A0A3L6F3J1_MAIZE	unreviewed	MES12	Zea mays (Maize)	Zm00001eb174120	MES12		Putative methylesterase 12, chloroplastic
B6TPP0	B6TPP0_MAIZE	unreviewed		Zea mays (Maize)	Zm00001eb174120			Polyneuridine-aldehyde esterase
C0PNX9	C0PNX9_MAIZE	unreviewed		Zea mays (Maize)	Zm00001eb174120			AB hydrolase-1 domain-containing protein
K7USI8	K7USI8_MAIZE	unreviewed		Zea mays (Maize)	Zm00001eb174120			Polyneuridine-aldehyde esterase
A0A1D6PXC3	A0A1D6PXC3_MAIZE	unreviewed		Zea mays (Maize)	Zm00001eb174130			Nucleic acid binding
A0A1D6PXC5	A0A1D6PXC5_MAIZE	unreviewed		Zea mays (Maize)	Zm00001eb174130			Nucleic acid binding
A0A1D6PXC6	A0A1D6PXC6_MAIZE	unreviewed		Zea mays (Maize)	Zm00001eb174130			Nucleic acid binding
A0A1D6PXC7	A0A1D6PXC7_MAIZE	unreviewed		Zea mays (Maize)	Zm00001eb174130			Nucleic acid binding
A0A1D6PXC8	A0A1D6PXC8_MAIZE	unreviewed	103653151	Zea mays (Maize)	Zm00001eb174130	103653151		Nucleic acid binding
A0A1D6PXD2	A0A1D6PXD2_MAIZE	unreviewed		Zea mays (Maize)	Zm00001eb174130			Nucleic acid binding
B6T3P2	B6T3P2_MAIZE	unreviewed	103653151	Zea mays (Maize)	Zm00001eb174130	103653151		Nucleic acid binding (Nucleic acid binding protein)
B6TXN9	B6TXN9_MAIZE	unreviewed		Zea mays (Maize)	Zm00001eb174130			Uncharacterized protein
K7U1Q6	K7U1Q6_MAIZE	unreviewed		Zea mays (Maize)	Zm00001eb174130			Nucleic acid binding
C4JAZ4	C4JAZ4_MAIZE	unreviewed	100502393	Zea mays (Maize)	Zm00001eb182260	100502393		Auxin response factor
A0A1D6Q3A5	A0A1D6Q3A5_MAIZE	unreviewed		Zea mays (Maize)	Zm00001eb182270			Molybdopterin synthase sulfur carrier subunit (Molybdenum cofactor synthesis protein 2 small subunit) (Molybdenum cofactor synthesis protein 2A) (MOCS2A) (Sulfur carrier protein MOCS2A)
A0A3L6F5G7	A0A3L6F5G7_MAIZE	unreviewed	VP15_0	Zea mays (Maize)	Zm00001eb182270	VP15_0		Molybdopterin synthase sulfur carrier subunit (Molybdenum cofactor synthesis protein 2 small subunit) (Molybdenum cofactor synthesis protein 2A) (MOCS2A) (Sulfur carrier protein MOCS2A)
A0A1D6HAS8	A0A1D6HAS8_MAIZE	unreviewed		Zea mays (Maize)	Zm00001eb182290			Uncharacterized protein
A0A3L6ERP5	A0A3L6ERP5_MAIZE	unreviewed		Zea mays (Maize)	Zm00001eb182290			Uncharacterized protein
A0A3L6EY85	A0A3L6EY85_MAIZE	unreviewed		Zea mays (Maize)	Zm00001eb182290			Uncharacterized protein
B4FHT0	B4FHT0_MAIZE	unreviewed		Zea mays (Maize)	Zm00001eb182290			Uncharacterized protein
B6TSS8	B6TSS8_MAIZE	unreviewed		Zea mays (Maize)	Zm00001eb182290			Uncharacterized protein
A0A3L6F9U5	A0A3L6F9U5_MAIZE	unreviewed	Acel_0614_1	Zea mays (Maize)	Zm00001eb183810	Acel_0614_1		Mannan endo-1,4-beta-mannosidase (EC 3.2.1.78)
K7UWQ5	K7UWQ5_MAIZE	unreviewed	100501654	Zea mays (Maize)	Zm00001eb183810	100501654		Mannan endo-1,4-beta-mannosidase (EC 3.2.1.78)
A0A1D6QB17	A0A1D6QB17_MAIZE	unreviewed		Zea mays (Maize)	Zm00001eb191610			Cinnamoyl-CoA reductase 1
A0A1D6QB18	A0A1D6QB18_MAIZE	unreviewed		Zea mays (Maize)	Zm00001eb191610			Cinnamoyl-CoA reductase 1
A0A3L6F398	A0A3L6F398_MAIZE	unreviewed	CCR1_20	Zea mays (Maize)	Zm00001eb191610	CCR1_20		Cinnamoyl-CoA reductase 1
K7UJU3	K7UJU3_MAIZE	unreviewed	103654125	Zea mays (Maize)	Zm00001eb191610	103654125		Cinnamoyl-CoA reductase 1
A0A3L6F211	A0A3L6F211_MAIZE	unreviewed		Zea mays (Maize)	Zm00001eb191620			PB1 domain-containing protein
C0HG45	C0HG45_MAIZE	unreviewed	100381453	Zea mays (Maize)	Zm00001eb191620	100381453		Octicosapeptide/Phox/Bem1p family protein
C0PF10	C0PF10_MAIZE	unreviewed	100381453	Zea mays (Maize)	Zm00001eb191620	100381453		PB1 domain-containing protein
A0A1Q0YY06	A0A1Q0YY06_MAIZE	unreviewed		Zea mays (Maize)	Zm00001eb195650			Scarecrow1
A0A317YBP3	A0A317YBP3_MAIZE	unreviewed	SCR_5	Zea mays (Maize)	Zm00001eb195650	SCR_5		Protein SCARECROW
A0A3L6DA00	A0A3L6DA00_MAIZE	unreviewed	SCR_2	Zea mays (Maize)	Zm00001eb195650	SCR_2		Protein SCARECROW
A0A3L6DCW9	A0A3L6DCW9_MAIZE	unreviewed	SCR_3	Zea mays (Maize)	Zm00001eb195650	SCR_3		Protein SCARECROW
A0A3L6F9E1	A0A3L6F9E1_MAIZE	unreviewed	SCR_0	Zea mays (Maize)	Zm00001eb195650	SCR_0		Protein SCARECROW
C0P5W3	C0P5W3_MAIZE	unreviewed		Zea mays (Maize)	Zm00001eb195650			Uncharacterized protein
Q9FUZ7	SCR_MAIZE	reviewed	SCR	Zea mays (Maize)	Zm00001eb195650	SCR		Protein SCARECROW (ZmSCR)
A0A1D6QGT6	A0A1D6QGT6_MAIZE	unreviewed		Zea mays (Maize)	Zm00001eb195670			Uncharacterized protein
A0A1D6QGT7	A0A1D6QGT7_MAIZE	unreviewed	100502360	Zea mays (Maize)	Zm00001eb195670	100502360		Jacalin-type lectin domain-containing protein
A0A3L6F529	A0A3L6F529_MAIZE	unreviewed	SALT_5	Zea mays (Maize)	Zm00001eb195670	SALT_5		Salt stress-induced protein
C4JAQ2	C4JAQ2_MAIZE	unreviewed		Zea mays (Maize)	Zm00001eb195670			Jacalin-type lectin domain-containing protein
A0A3L6EWZ1	A0A3L6EWZ1_MAIZE	unreviewed		Zea mays (Maize)	Zm00001eb198170			Uncharacterized protein
K7UMM2	K7UMM2_MAIZE	unreviewed		Zea mays (Maize)	Zm00001eb198170			Uncharacterized protein
A0A3L6EZC3	A0A3L6EZC3_MAIZE	unreviewed	At1g29880_0	Zea mays (Maize)	Zm00001eb198180	At1g29880_0		Diadenosine tetraphosphate synthetase (EC 6.1.1.14)
C0PGQ1	C0PGQ1_MAIZE	unreviewed	100383520	Zea mays (Maize)	Zm00001eb198180	100383520		Diadenosine tetraphosphate synthetase (EC 6.1.1.14)
A0A1D6QPC7	A0A1D6QPC7_MAIZE	unreviewed		Zea mays (Maize)	Zm00001eb198200			UPF0481 protein
A0A3L6EXQ9	A0A3L6EXQ9_MAIZE	unreviewed	At3g47200_9	Zea mays (Maize)	Zm00001eb198200	At3g47200_9		UPF0481 protein
A0A3L6F302	A0A3L6F302_MAIZE	unreviewed	At3g47200_3	Zea mays (Maize)	Zm00001eb198200	At3g47200_3		UPF0481 protein
B6UF51	B6UF51_MAIZE	unreviewed		Zea mays (Maize)	Zm00001eb198200			Uncharacterized protein
C4J4U1	C4J4U1_MAIZE	unreviewed		Zea mays (Maize)	Zm00001eb198200			Uncharacterized protein
C4J646	C4J646_MAIZE	unreviewed	100278888	Zea mays (Maize)	Zm00001eb198200	100278888		UPF0481 protein
A0A3L6F1K0	A0A3L6F1K0_MAIZE	unreviewed	GFT1_1	Zea mays (Maize)	Zm00001eb198210	GFT1_1		GDP-fucose transporter 1
B6T6K9	B6T6K9_MAIZE	unreviewed		Zea mays (Maize)	Zm00001eb198210			TPT domain-containing protein
K7UMM7	K7UMM7_MAIZE	unreviewed		Zea mays (Maize)	Zm00001eb198210			GDP-mannose transporter GONST4
B6UFX1	B6UFX1_MAIZE	unreviewed		Zea mays (Maize)	Zm00001eb201970			Uncharacterized protein
A0A1D6QND4	A0A1D6QND4_MAIZE	unreviewed		Zea mays (Maize)	Zm00001eb203020			Uncharacterized protein
A0A1D6QND6	A0A1D6QND6_MAIZE	unreviewed		Zea mays (Maize)	Zm00001eb203030			Uncharacterized protein
A0A3L6F102	A0A3L6F102_MAIZE	unreviewed		Zea mays (Maize)	Zm00001eb203030			Uncharacterized protein
B4FN75	B4FN75_MAIZE	unreviewed	100272365	Zea mays (Maize)	Zm00001eb203030	100272365		Uncharacterized protein
