# Supplementary material for: Archaeological Bolivian maize genomes suggest diversity is associated with Inca cultural expansion and environmental variation in South America
Source: Research Square preprint supplement (doi:10.21203/rs.3.rs-2592230/v1), 2023-03-03
Supplement: Supplementary file 6 [file eeb9672a9c97839c3a4d69b9.xlsx]

## Sheet: Supplementary Data Set 5
Supplementary DataSet 5. Gene Ontology Enrichment of top 1% gene of ancient mazie vs modern mazie in Sounth America.
Biological Process
glycosyl compound catabolic process	0.000411915	Zm00001eb039560,Zm00001eb103040,Zm00001eb127230	GO:1901658
chloroplast mRNA processing	0.00155084	Zm00001eb063890,Zm00001eb233080	GO:0010239
fucose metabolic process	0.00187403	Zm00001eb040420,Zm00001eb103040,Zm00001eb232980,Zm00001eb288680	GO:0006004
carbohydrate derivative catabolic process	0.0021522	Zm00001eb039560,Zm00001eb103040,Zm00001eb127230,Zm00001eb425600	GO:1901136
glycosyl compound metabolic process	0.00290948	Zm00001eb039560,Zm00001eb059170,Zm00001eb103040,Zm00001eb127230	GO:1901657
carbohydrate derivative metabolic process	0.00353211	Zm00001eb015460,Zm00001eb039560,Zm00001eb039570,Zm00001eb040400,Zm00001eb059170,Zm00001eb059180,Zm00001eb103040,Zm00001eb127230,Zm00001eb222710,Zm00001eb240960,Zm00001eb270050,Zm00001eb270890,Zm00001eb285660,Zm00001eb378030,Zm00001eb397360,Zm00001eb425600	GO:1901135
purine nucleoside catabolic process	0.00440556	Zm00001eb039560,Zm00001eb127230	GO:0006152
wybutosine metabolic process	0.00668362	Zm00001eb059170	GO:0031590
wybutosine biosynthetic process	0.00668362	Zm00001eb059170	GO:0031591
nucleoside catabolic process	0.00705007	Zm00001eb039560,Zm00001eb127230	GO:0009164
chloroplast RNA processing	0.00705007	Zm00001eb063890,Zm00001eb233080	GO:0031425
nucleobase-containing small molecule catabolic process	0.00705007	Zm00001eb039560,Zm00001eb127230	GO:0034656
UDP-D-xylose metabolic process	0.00779919	Zm00001eb285660,Zm00001eb397360	GO:0033319
UDP-D-xylose biosynthetic process	0.00779919	Zm00001eb285660,Zm00001eb397360	GO:0033320
purine-containing compound catabolic process	0.0120483	Zm00001eb039560,Zm00001eb127230	GO:0072523
phytosphingosine metabolic process	0.0133228	Zm00001eb001870	GO:0006671
polycistronic mRNA processing	0.0133228	Zm00001eb063890	GO:0031426
membrane fission	0.0149836	Zm00001eb092520,Zm00001eb137840	GO:0090148
D-xylose metabolic process	0.0170935	Zm00001eb285660,Zm00001eb397360	GO:0042732
organonitrogen compound catabolic process	0.0180782	Zm00001eb014570,Zm00001eb039560,Zm00001eb040360,Zm00001eb127230,Zm00001eb152830,Zm00001eb222700,Zm00001eb233090,Zm00001eb259220,Zm00001eb270910,Zm00001eb335970,Zm00001eb345400,Zm00001eb420070,Zm00001eb421680,Zm00001eb425600	GO:1901565
cytokinesis by cell plate formation	0.018193	Zm00001eb092520,Zm00001eb137840	GO:0000911
maintenance of protein location in cell	0.0193217	Zm00001eb090540,Zm00001eb270920	GO:0032507
maintenance of protein location	0.0193217	Zm00001eb090540,Zm00001eb270920	GO:0045185
monosaccharide metabolic process	0.0198517	Zm00001eb040420,Zm00001eb103040,Zm00001eb232980,Zm00001eb285660,Zm00001eb288680,Zm00001eb397360	GO:0005996
xenobiotic metabolic process	0.0199179	Zm00001eb335970	GO:0006805
glycoside metabolic process	0.0199179	Zm00001eb103040	GO:0016137
glycoside catabolic process	0.0199179	Zm00001eb103040	GO:0016139
sulfate reduction	0.0199179	Zm00001eb105800	GO:0019419
positive regulation of DNA endoreduplication	0.0199179	Zm00001eb137840	GO:0032877
positive regulation of DNA replication	0.0199179	Zm00001eb137840	GO:0045740
positive regulation of cell size	0.0199179	Zm00001eb137840	GO:0045793
regulation of chromosome condensation	0.0199179	Zm00001eb274810	GO:0060623
cellular response to xenobiotic stimulus	0.0199179	Zm00001eb335970	GO:0071466
positive regulation of DNA-dependent DNA replication	0.0199179	Zm00001eb137840	GO:2000105
SCF-dependent proteasomal ubiquitin-dependent protein catabolic process	0.0206657	Zm00001eb040360,Zm00001eb270910,Zm00001eb421680	GO:0031146
nucleobase-containing small molecule metabolic process	0.0211412	Zm00001eb039560,Zm00001eb039570,Zm00001eb040400,Zm00001eb063870,Zm00001eb127230,Zm00001eb240960,Zm00001eb270050,Zm00001eb270890,Zm00001eb285660,Zm00001eb397360	GO:0055086
organonitrogen compound metabolic process	0.0218383	Zm00001eb001710,Zm00001eb001840,Zm00001eb001870,Zm00001eb001880,Zm00001eb014570,Zm00001eb015460,Zm00001eb015480,Zm00001eb037870,Zm00001eb037880,Zm00001eb039560,Zm00001eb039570,Zm00001eb039590,Zm00001eb039610,Zm00001eb040360,Zm00001eb040400,Zm00001eb043920,Zm00001eb051840,Zm00001eb059170,Zm00001eb059180,Zm00001eb059210,Zm00001eb063850,Zm00001eb063860,Zm00001eb063870,Zm00001eb063900,Zm00001eb070430…	GO:1901564
regulation of sister chromatid cohesion	0.0264691	Zm00001eb274810	GO:0007063
phosphoenolpyruvate transport	0.0264691	Zm00001eb042970	GO:0015714
long-chain fatty-acyl-CoA metabolic process	0.0264691	Zm00001eb039570	GO:0035336
cohesin loading	0.0264691	Zm00001eb274810	GO:0071921
regulation of cohesin loading	0.0264691	Zm00001eb274810	GO:0071922
phosphoenolpyruvate transmembrane transport	0.0264691	Zm00001eb042970	GO:0089722
regulation of protein localization to chromatin	0.0264691	Zm00001eb274810	GO:1905634
purine nucleoside metabolic process	0.0280021	Zm00001eb039560,Zm00001eb127230	GO:0042278
regulation of organelle organization	0.0286026	Zm00001eb092520,Zm00001eb270050,Zm00001eb270920,Zm00001eb274810	GO:0033043
pentose metabolic process	0.0321172	Zm00001eb285660,Zm00001eb397360	GO:0019321
cAMP-mediated signaling	0.0329767	Zm00001eb040800	GO:0019933
cyclic-nucleotide-mediated signaling	0.0329767	Zm00001eb040800	GO:0019935
fatty-acyl-CoA metabolic process	0.0329767	Zm00001eb039570	GO:0035337
regulation of adenylate cyclase activity	0.0329767	Zm00001eb040800	GO:0045761
regulation of lyase activity	0.0329767	Zm00001eb040800	GO:0051339
regulation of ribosome biogenesis	0.0329767	Zm00001eb001860	GO:0090069
peptidyl-tyrosine dephosphorylation	0.0335386	Zm00001eb039610,Zm00001eb051840	GO:0035335
maintenance of location in cell	0.0349842	Zm00001eb090540,Zm00001eb270920	GO:0051651
vacuolar protein processing	0.0394411	Zm00001eb345400	GO:0006624
nuclear pore organization	0.0394411	Zm00001eb250810	GO:0006999
suberin biosynthetic process	0.0394411	Zm00001eb039570	GO:0010345
triose phosphate transport	0.0394411	Zm00001eb042970	GO:0015717
triose phosphate transmembrane transport	0.0394411	Zm00001eb042970	GO:0035436
tRNA 3'-trailer cleavage	0.0394411	Zm00001eb339290	GO:0042779
protein localization to chromatin	0.0394411	Zm00001eb274810	GO:0071168
regulation of phragmoplast microtubule organization	0.0394411	Zm00001eb092520	GO:2000694
protein localization	0.0428525	Zm00001eb001690,Zm00001eb014540,Zm00001eb017130,Zm00001eb040390,Zm00001eb090540,Zm00001eb129020,Zm00001eb222700,Zm00001eb250810,Zm00001eb259160,Zm00001eb270920,Zm00001eb274810,Zm00001eb335940,Zm00001eb339300,Zm00001eb420070	GO:0008104
response to xenobiotic stimulus	0.0458625	Zm00001eb335970	GO:0009410
regulation of abscisic acid biosynthetic process	0.0458625	Zm00001eb007060	GO:0010115
regulation of cyclase activity	0.0458625	Zm00001eb040800	GO:0031279
regulation of vacuole fusion, non-autophagic	0.0458625	Zm00001eb270050	GO:0032889
vacuole fusion, non-autophagic	0.0458625	Zm00001eb270050	GO:0042144
FAD metabolic process	0.0458625	Zm00001eb240960	GO:0046443
chaperone-mediated protein complex assembly	0.0458625	Zm00001eb014570	GO:0051131
phragmoplast microtubule organization	0.0458625	Zm00001eb092520	GO:0080175
vacuole fusion	0.0458625	Zm00001eb270050	GO:0097576
protein maturation by [4Fe-4S] cluster transfer	0.0458625	Zm00001eb059210	GO:0106035
glutamine family amino acid metabolic process	0.0477195	Zm00001eb037870,Zm00001eb037880,Zm00001eb141220	GO:0009064
Cellular Componen
SCF ubiquitin ligase complex	0.0118636	Zm00001eb040360,Zm00001eb270910,Zm00001eb421680	GO:0019005
nuclear pore transmembrane ring	0.01289	Zm00001eb250810	GO:0070762
cullin-RING ubiquitin ligase complex	0.0140649	Zm00001eb040360,Zm00001eb270910,Zm00001eb335650,Zm00001eb421680	GO:0031461
preprophase band	0.0256148	Zm00001eb092520	GO:0009574
mannosyltransferase complex	0.0256148	Zm00001eb059180	GO:0031501
dolichol-phosphate-mannose synthase complex	0.0256148	Zm00001eb059180	GO:0033185
ubiquitin ligase complex	0.0369407	Zm00001eb040360,Zm00001eb270910,Zm00001eb335650,Zm00001eb421680	GO:0000151
extrinsic component of vacuolar membrane	0.0381765	Zm00001eb420070	GO:0000306
Pwp2p-containing subcomplex of 90S preribosome	0.0381765	Zm00001eb040830	GO:0034388
transcription export complex	0.0443969	Zm00001eb001480	GO:0000346
THO complex part of transcription export complex	0.0443969	Zm00001eb001480	GO:0000445
clathrin coat	0.044636	Zm00001eb017130,Zm00001eb038500	GO:0030118
catalytic complex	0.0483582	Zm00001eb040360,Zm00001eb051830,Zm00001eb059180,Zm00001eb144750,Zm00001eb151060,Zm00001eb222710,Zm00001eb233090,Zm00001eb270050,Zm00001eb270910,Zm00001eb288640,Zm00001eb335650,Zm00001eb338740,Zm00001eb353150,Zm00001eb421680	GO:1902494
Molecular Function
purine nucleosidase activity	0.00117691	Zm00001eb039560,Zm00001eb127230	GO:0008477
scopolin beta-glucosidase activity	0.00117691	Zm00001eb288750,Zm00001eb288760	GO:0102483
3-phosphoshikimate 1-carboxyvinyltransferase activity	0.0065848	Zm00001eb378020	GO:0003866
adenylate cyclase activity	0.0065848	Zm00001eb040800	GO:0004016
adenylate cyclase binding	0.0065848	Zm00001eb040800	GO:0008179
intramolecular transferase activity, transferring amino groups	0.0065848	Zm00001eb291360	GO:0016869
glutamate-1-semialdehyde 2,1-aminomutase activity	0.0065848	Zm00001eb291360	GO:0042286
UDP-glucuronate decarboxylase activity	0.00834391	Zm00001eb285660,Zm00001eb397360	GO:0048040
glutathione binding	0.00913881	Zm00001eb137820,Zm00001eb142220	GO:0043295
oligopeptide binding	0.00913881	Zm00001eb137820,Zm00001eb142220	GO:1900750
dihydrouracil dehydrogenase (NAD+) activity	0.0131264	Zm00001eb240960	GO:0004159
pyrroline-5-carboxylate reductase activity	0.0131264	Zm00001eb141220	GO:0004735
5-amino-6-(5-phosphoribosylamino)uracil reductase activity	0.0131264	Zm00001eb240960	GO:0008703
triose-phosphate:phosphate antiporter activity	0.0131264	Zm00001eb042970	GO:0009670
AMP dimethylallyltransferase activity	0.0131264	Zm00001eb139980	GO:0009824
tRNA-4-demethylwyosine synthase activity	0.0131264	Zm00001eb059170	GO:0102521
hydrolase activity, acting on glycosyl bonds	0.0161835	Zm00001eb001830,Zm00001eb039560,Zm00001eb103040,Zm00001eb127230,Zm00001eb240960,Zm00001eb276100,Zm00001eb288750,Zm00001eb288760,Zm00001eb338750,Zm00001eb348860,Zm00001eb425600	GO:0016798
hydrolase activity, hydrolyzing N-glycosyl compounds	0.0170243	Zm00001eb039560,Zm00001eb127230,Zm00001eb240960	GO:0016799
metalloaminopeptidase activity	0.018797	Zm00001eb043920,Zm00001eb105810	GO:0070006
modified amino acid binding	0.018797	Zm00001eb137820,Zm00001eb142220	GO:0072341
peptidyltransferase activity	0.0196252	Zm00001eb335970	GO:0000048
phosphoadenylyl-sulfate reductase (thioredoxin) activity	0.0196252	Zm00001eb105800	GO:0004604
diaminohydroxyphosphoribosylaminopyrimidine deaminase activity	0.0196252	Zm00001eb240960	GO:0008835
glutathione gamma-glutamylcysteinyltransferase activity	0.0196252	Zm00001eb335970	GO:0016756
glutathione hydrolase activity	0.0196252	Zm00001eb335970	GO:0036374
magnesium-protoporphyrin IX monomethyl ester (oxidative) cyclase activity	0.0196252	Zm00001eb129000	GO:0048529
NAD+ binding	0.0259661	Zm00001eb285660,Zm00001eb397360	GO:0070403
phosphoenolpyruvate:phosphate antiporter activity	0.0260814	Zm00001eb042970	GO:0015121
organophosphate:inorganic phosphate antiporter activity	0.0260814	Zm00001eb042970	GO:0015315
secondary active monocarboxylate transmembrane transporter activity	0.0260814	Zm00001eb042970	GO:0015355
phosphoenolpyruvate transmembrane transporter activity	0.0260814	Zm00001eb042970	GO:0089721
peptide binding	0.0263964	Zm00001eb090540,Zm00001eb137820,Zm00001eb142220	GO:0042277
auxin binding	0.0324953	Zm00001eb137840	GO:0010011
mRNA 5'-UTR binding	0.0324953	Zm00001eb063890	GO:0048027
protein tyrosine phosphatase activity	0.0340585	Zm00001eb039610,Zm00001eb051840	GO:0004725
metalloexopeptidase activity	0.0384251	Zm00001eb043920,Zm00001eb105810	GO:0008235
glutathione synthase activity	0.0388672	Zm00001eb137820	GO:0004363
nicotinate phosphoribosyltransferase activity	0.0388672	Zm00001eb063870	GO:0004516
alpha-L-fucosidase activity	0.0388672	Zm00001eb103040	GO:0004560
triose-phosphate transmembrane transporter activity	0.0388672	Zm00001eb042970	GO:0071917
histidine phosphotransfer kinase activity	0.0451973	Zm00001eb039590	GO:0009927
phosphate ion transmembrane transporter activity	0.0451973	Zm00001eb042970	GO:0015114
proline-rich region binding	0.0451973	Zm00001eb270920	GO:0070064
fatty-acyl-CoA reductase (alcohol-forming) activity	0.0451973	Zm00001eb039570	GO:0080019
alcohol-forming fatty acyl-CoA reductase activity	0.0451973	Zm00001eb039570	GO:0102965
acid phosphatase activity	0.0461436	Zm00001eb039610,Zm00001eb053560	GO:0003993
aminopeptidase activity	0.0493772	Zm00001eb043920,Zm00001eb105810	GO:0004177
#Entry	Entry name	Status	Gene names(primary )	Organism	Gene names(ORF)	Gene names(primary )	Gene names(synonym )	Protein names
A0A1D6JLQ5	A0A1D6JLQ5_MAIZE	unreviewed	103631020	Zea mays (Maize)	Zm00001eb001480	103631020		THO complex subunit 7B-like1
A0A317Y3J4	A0A317Y3J4_MAIZE	unreviewed	THO7B_0	Zea mays (Maize)	Zm00001eb001480	THO7B_0		THO complex subunit 7B
A0A1D6JLQ8	A0A1D6JLQ8_MAIZE	unreviewed		Zea mays (Maize)	Zm00001eb001490			ALA-interacting subunit
A0A317Y3S8	A0A317Y3S8_MAIZE	unreviewed		Zea mays (Maize)	Zm00001eb001490			ALA-interacting subunit
A0A317Y4E2	A0A317Y4E2_MAIZE	unreviewed		Zea mays (Maize)	Zm00001eb001490			ALA-interacting subunit
B4FDP2	B4FDP2_MAIZE	unreviewed	100193072	Zea mays (Maize)	Zm00001eb001490	100193072		ALA-interacting subunit
A0A1D6JLR5	A0A1D6JLR5_MAIZE	unreviewed		Zea mays (Maize)	Zm00001eb001500			Uncharacterized protein
A0A1D6JLR7	A0A1D6JLR7_MAIZE	unreviewed	100272698	Zea mays (Maize)	Zm00001eb001500	100272698		Uncharacterized protein
A0A1D6JLR8	A0A1D6JLR8_MAIZE	unreviewed		Zea mays (Maize)	Zm00001eb001500			Uncharacterized protein
A0A317YH00	A0A317YH00_MAIZE	unreviewed		Zea mays (Maize)	Zm00001eb001500			Uncharacterized protein
A0A317YHA8	A0A317YHA8_MAIZE	unreviewed		Zea mays (Maize)	Zm00001eb001500			Uncharacterized protein
A0A317YHC4	A0A317YHC4_MAIZE	unreviewed		Zea mays (Maize)	Zm00001eb001500			Uncharacterized protein
A0A317YJJ4	A0A317YJJ4_MAIZE	unreviewed		Zea mays (Maize)	Zm00001eb001500			Uncharacterized protein
B4FQ01	B4FQ01_MAIZE	unreviewed		Zea mays (Maize)	Zm00001eb001500			Uncharacterized protein
B4FT60	B4FT60_MAIZE	unreviewed		Zea mays (Maize)	Zm00001eb001500			Uncharacterized protein
B8A1Y8	B8A1Y8_MAIZE	unreviewed		Zea mays (Maize)	Zm00001eb001500			Uncharacterized protein
C0PPF8	C0PPF8_MAIZE	unreviewed	100272698	Zea mays (Maize)	Zm00001eb001500	100272698		Uncharacterized protein
A0A1D6JLS0	A0A1D6JLS0_MAIZE	unreviewed	100501751	Zea mays (Maize)	Zm00001eb001510	100501751		Remorin family protein
A0A1D6JLS1	A0A1D6JLS1_MAIZE	unreviewed		Zea mays (Maize)	Zm00001eb001510			Remorin family protein
A0A317Y3R9	A0A317Y3R9_MAIZE	unreviewed		Zea mays (Maize)	Zm00001eb001510			Remorin_C domain-containing protein
A0A317Y4P2	A0A317Y4P2_MAIZE	unreviewed		Zea mays (Maize)	Zm00001eb001510			Remorin_C domain-containing protein
C4J5M4	C4J5M4_MAIZE	unreviewed	100501751	Zea mays (Maize)	Zm00001eb001510	100501751		Remorin_C domain-containing protein
A0A1D6JM37	A0A1D6JM37_MAIZE	unreviewed	103631168	Zea mays (Maize)	Zm00001eb001690	103631168		Transmembrane 9 superfamily member
A0A317Y145	A0A317Y145_MAIZE	unreviewed	TMN11_0	Zea mays (Maize)	Zm00001eb001690	TMN11_0		Transmembrane 9 superfamily member
A0A1D6JM38	A0A1D6JM38_MAIZE	unreviewed		Zea mays (Maize)	Zm00001eb001700			Phragmoplastin interacting protein 1
A0A317Y3U1	A0A317Y3U1_MAIZE	unreviewed	sce3	Zea mays (Maize)	Zm00001eb001700	sce3		Putative RNA-binding protein sce3
B4FKK3	B4FKK3_MAIZE	unreviewed		Zea mays (Maize)	Zm00001eb001700			Phragmoplastin interacting protein 1
B6TYA4	B6TYA4_MAIZE	unreviewed		Zea mays (Maize)	Zm00001eb001700			RNA binding protein
A0A1D6JM40	A0A1D6JM40_MAIZE	unreviewed		Zea mays (Maize)	Zm00001eb001710			Protein FIZZY-RELATED 1
A0A1D6JM41	A0A1D6JM41_MAIZE	unreviewed		Zea mays (Maize)	Zm00001eb001710			Protein FIZZY-RELATED 1
A0A317Y278	A0A317Y278_MAIZE	unreviewed		Zea mays (Maize)	Zm00001eb001710			Protein FIZZY-RELATED 2
B6TPJ2	B6TPJ2_MAIZE	unreviewed	100284049	Zea mays (Maize)	Zm00001eb001720	100284049		Homeobox protein HD1 (Knotted related homeobox1)
P56659	KNOX1_MAIZE	reviewed	KNOX1	Zea mays (Maize)	Zm00001eb001720	KNOX1		Homeobox protein knotted-1-like 1 (Fragment)
A0A317Y138	A0A317Y138_MAIZE	unreviewed		Zea mays (Maize)	Zm00001eb001760			Uncharacterized protein
B4FKE5	B4FKE5_MAIZE	unreviewed	100216915	Zea mays (Maize)	Zm00001eb001760	100216915		Alpha/beta hydrolase related protein
B6TXT9	B6TXT9_MAIZE	unreviewed		Zea mays (Maize)	Zm00001eb001760			Hydrolase
A0A317Y143	A0A317Y143_MAIZE	unreviewed		Zea mays (Maize)	Zm00001eb001770			Homeobox protein BEL1
B6SYZ7	B6SYZ7_MAIZE	unreviewed		Zea mays (Maize)	Zm00001eb001770			BEL1-related homeotic protein 14
B6SZ15	B6SZ15_MAIZE	unreviewed	100281788	Zea mays (Maize)	Zm00001eb001770	100281788		BEL1-related homeotic protein 14 (Homeobox-transcription factor 30)
A0A317Y160	A0A317Y160_MAIZE	unreviewed	At5g24010_1	Zea mays (Maize)	Zm00001eb001810	At5g24010_1		Putative receptor-like protein kinase
B4FM72	B4FM72_MAIZE	unreviewed		Zea mays (Maize)	Zm00001eb001810			Malectin_like domain-containing protein
B6TWY5	B6TWY5_MAIZE	unreviewed	100272871	Zea mays (Maize)	Zm00001eb001810	100272871		ATP binding protein
A0A1D6JM51	A0A1D6JM51_MAIZE	unreviewed		Zea mays (Maize)	Zm00001eb001820			Uncharacterized protein (Fragment)
A0A1D6JM53	A0A1D6JM53_MAIZE	unreviewed		Zea mays (Maize)	Zm00001eb001830			Pectin lyase-like superfamily protein
A0A1D6JM54	A0A1D6JM54_MAIZE	unreviewed		Zea mays (Maize)	Zm00001eb001830			Pectin lyase-like superfamily protein
A0A317YGJ9	A0A317YGJ9_MAIZE	unreviewed	GSVIVT00026920001_1	Zea mays (Maize)	Zm00001eb001830	GSVIVT00026920001_1		Putative polygalacturonase
B6TX01	B6TX01_MAIZE	unreviewed	100284735	Zea mays (Maize)	Zm00001eb001830	100284735		Glycoside hydrolase, family 28 (Pectin lyase-like superfamily protein)
A0A317YE96	A0A317YE96_MAIZE	unreviewed	RPL5_1	Zea mays (Maize)	Zm00001eb001840	RPL5_1		50S ribosomal protein L5, chloroplastic
B6SST7	B6SST7_MAIZE	unreviewed	100281329	Zea mays (Maize)	Zm00001eb001840	100281329		50S ribosomal protein L5, chloroplastic
B6SUE4	B6SUE4_MAIZE	unreviewed		Zea mays (Maize)	Zm00001eb001840			50S ribosomal protein L5
B6U8G6	B6U8G6_MAIZE	unreviewed		Zea mays (Maize)	Zm00001eb001840			50S ribosomal protein L5, chloroplastic
A0A1D6JM57	A0A1D6JM57_MAIZE	unreviewed		Zea mays (Maize)	Zm00001eb001860			D111/G-patch domain-containing protein
A0A1D6JM58	A0A1D6JM58_MAIZE	unreviewed		Zea mays (Maize)	Zm00001eb001860			D111/G-patch domain-containing protein
A0A1D6JM59	A0A1D6JM59_MAIZE	unreviewed		Zea mays (Maize)	Zm00001eb001860			D111/G-patch domain-containing protein
A0A317YE86	A0A317YE86_MAIZE	unreviewed	Pinx1	Zea mays (Maize)	Zm00001eb001860	Pinx1		PIN2/TERF1-interacting telomerase inhibitor 1
B4FZZ1	B4FZZ1_MAIZE	unreviewed		Zea mays (Maize)	Zm00001eb001860			G-patch domain-containing protein
B6TBI8	B6TBI8_MAIZE	unreviewed		Zea mays (Maize)	Zm00001eb001860			Nucleic acid binding protein
A0A1D6JM60	A0A1D6JM60_MAIZE	unreviewed		Zea mays (Maize)	Zm00001eb001870			Sphingoid long-chain bases kinase 2 mitochondrial
A0A1D6JM63	A0A1D6JM63_MAIZE	unreviewed		Zea mays (Maize)	Zm00001eb001870			Sphingoid long-chain bases kinase 2 mitochondrial
A0A1D6JM64	A0A1D6JM64_MAIZE	unreviewed		Zea mays (Maize)	Zm00001eb001870			Sphingoid long-chain bases kinase 2 mitochondrial
A0A1D6LHF4	A0A1D6LHF4_MAIZE	unreviewed		Zea mays (Maize)	Zm00001eb001870			Uncharacterized protein
A0A317YDZ8	A0A317YDZ8_MAIZE	unreviewed	LCKB2_1	Zea mays (Maize)	Zm00001eb001870	LCKB2_1		Sphingoid long-chain bases kinase 2, mitochondrial
A0A3L6EJY6	A0A3L6EJY6_MAIZE	unreviewed	LCKB2_0	Zea mays (Maize)	Zm00001eb001870	LCKB2_0		Sphingoid long-chain bases kinase 2, mitochondrial
B4FIE8	B4FIE8_MAIZE	unreviewed	100194359	Zea mays (Maize)	Zm00001eb001870	100194359		Sphingoid long-chain bases kinase 2 mitochondrial
B6TDW8	B6TDW8_MAIZE	unreviewed		Zea mays (Maize)	Zm00001eb001870			D-erythro-sphingosine kinase/ diacylglycerol kinase
A0A317YG78	A0A317YG78_MAIZE	unreviewed		Zea mays (Maize)	Zm00001eb001880			Putative serine/threonine-protein kinase
B6SVN5	B6SVN5_MAIZE	unreviewed		Zea mays (Maize)	Zm00001eb001880			BRASSINOSTEROID INSENSITIVE 1-associated receptor kinase 1
C0PCX6	C0PCX6_MAIZE	unreviewed	100281469	Zea mays (Maize)	Zm00001eb001880	100281469		Putative serine/threonine-protein kinase
A0A1D6JM68	A0A1D6JM68_MAIZE	unreviewed		Zea mays (Maize)	Zm00001eb001890			DET1- and DDB1-associated protein 1
A0A1D6JM69	A0A1D6JM69_MAIZE	unreviewed		Zea mays (Maize)	Zm00001eb001890			DET1- and DDB1-associated protein 1
A0A1D6JM71	A0A1D6JM71_MAIZE	unreviewed		Zea mays (Maize)	Zm00001eb001890			DET1- and DDB1-associated protein 1
A0A1D6JM72	A0A1D6JM72_MAIZE	unreviewed		Zea mays (Maize)	Zm00001eb001890			DET1- and DDB1-associated protein 1 (Fragment)
A0A1D6JM73	A0A1D6JM73_MAIZE	unreviewed		Zea mays (Maize)	Zm00001eb001890			Det1 complexing ubiquitin ligase
A0A1D6JM75	A0A1D6JM75_MAIZE	unreviewed		Zea mays (Maize)	Zm00001eb001890			DET1- and DDB1-associated protein 1
A0A317Y7I6	A0A317Y7I6_MAIZE	unreviewed		Zea mays (Maize)	Zm00001eb001890			DET1- and DDB1-associated protein 1 (Fragment)
B6U5Z1	B6U5Z1_MAIZE	unreviewed		Zea mays (Maize)	Zm00001eb001890			DET1- and DDB1-associated protein 1
A0A096PQM6	A0A096PQM6_MAIZE	unreviewed	100275262	Zea mays (Maize)	Zm00001eb007050	100275262		Nucleotidyltransferase
A0A317Y5C1	A0A317Y5C1_MAIZE	unreviewed		Zea mays (Maize)	Zm00001eb007050			NTP_transf_2 domain-containing protein
A0A317YBP4	A0A317YBP4_MAIZE	unreviewed		Zea mays (Maize)	Zm00001eb007060			Uncharacterized protein
C0P4E8	C0P4E8_MAIZE	unreviewed	100382106	Zea mays (Maize)	Zm00001eb007060	100382106		Nodulin-related protein 1
A0A1D6F114	A0A1D6F114_MAIZE	unreviewed		Zea mays (Maize)	Zm00001eb014540			Component of oligomeric Golgi complex 8 (Conserved oligomeric Golgi complex subunit 8)
A0A1D6K087	A0A1D6K087_MAIZE	unreviewed		Zea mays (Maize)	Zm00001eb014540			Component of oligomeric Golgi complex 8 (Conserved oligomeric Golgi complex subunit 8)
A0A1D6K088	A0A1D6K088_MAIZE	unreviewed		Zea mays (Maize)	Zm00001eb014540			Tubulin beta chain
A0A317YAU8	A0A317YAU8_MAIZE	unreviewed	TUBB1_0	Zea mays (Maize)	Zm00001eb014540	TUBB1_0		Component of oligomeric Golgi complex 8 (Conserved oligomeric Golgi complex subunit 8)
A0A3L6E2B7	A0A3L6E2B7_MAIZE	unreviewed	TUBB1_1	Zea mays (Maize)	Zm00001eb014540	TUBB1_1		Tubulin beta-1 chain
A0A1D6K089	A0A1D6K089_MAIZE	unreviewed		Zea mays (Maize)	Zm00001eb014550			Outer envelope pore protein 16-2 chloroplastic
A0A1D6K091	A0A1D6K091_MAIZE	unreviewed		Zea mays (Maize)	Zm00001eb014550			Outer envelope pore protein 16-2 chloroplastic
A0A1D6K092	A0A1D6K092_MAIZE	unreviewed		Zea mays (Maize)	Zm00001eb014550			Outer envelope pore protein 16-2 chloroplastic
A0A317YIA9	A0A317YIA9_MAIZE	unreviewed		Zea mays (Maize)	Zm00001eb014550			Outer envelope pore protein 16-2, chloroplastic
A0A317YKE7	A0A317YKE7_MAIZE	unreviewed		Zea mays (Maize)	Zm00001eb014550			Uncharacterized protein
B6SIR2	B6SIR2_MAIZE	unreviewed		Zea mays (Maize)	Zm00001eb014550			Uncharacterized protein
B6SM89	B6SM89_MAIZE	unreviewed		Zea mays (Maize)	Zm00001eb014550			Uncharacterized protein
B6UFN0	B6UFN0_MAIZE	unreviewed		Zea mays (Maize)	Zm00001eb014550			Outer envelope pore protein 16-2 chloroplastic
A0A1D6K093	A0A1D6K093_MAIZE	unreviewed		Zea mays (Maize)	Zm00001eb014560			Xyloglucan 6-xylosyltransferase 2
A0A1D6PC37	A0A1D6PC37_MAIZE	unreviewed		Zea mays (Maize)	Zm00001eb014560			Xyloglucan 6-xylosyltransferase 2
A0A317YD64	A0A317YD64_MAIZE	unreviewed	GT4_5	Zea mays (Maize)	Zm00001eb014560	GT4_5		Putative glycosyltransferase 4
A0A3L6DGD6	A0A3L6DGD6_MAIZE	unreviewed	GT4_0	Zea mays (Maize)	Zm00001eb014560	GT4_0		Putative glycosyltransferase 4
K7VMJ7	K7VMJ7_MAIZE	unreviewed		Zea mays (Maize)	Zm00001eb014560			Xyloglucan 6-xylosyltransferase 2
A0A1D6F4R0	A0A1D6F4R0_MAIZE	unreviewed		Zea mays (Maize)	Zm00001eb014570			Lon protease homolog 2 peroxisomal
A0A1D6F4R8	A0A1D6F4R8_MAIZE	unreviewed		Zea mays (Maize)	Zm00001eb014570			Lon protease homolog 2 peroxisomal
A0A1D6F4S0	A0A1D6F4S0_MAIZE	unreviewed		Zea mays (Maize)	Zm00001eb014570			Lon protease homolog 2 peroxisomal
A0A1D6IP20	A0A1D6IP20_MAIZE	unreviewed		Zea mays (Maize)	Zm00001eb014570			LON protease2
A0A1D6IP25	A0A1D6IP25_MAIZE	unreviewed		Zea mays (Maize)	Zm00001eb014570			LON protease2
A0A1D6IP27	A0A1D6IP27_MAIZE	unreviewed		Zea mays (Maize)	Zm00001eb014570			LON protease2
A0A317Y5R1	A0A317Y5R1_MAIZE	unreviewed		Zea mays (Maize)	Zm00001eb014720			Uncharacterized protein
B6TD46	B6TD46_MAIZE	unreviewed	100276515	Zea mays (Maize)	Zm00001eb014720	100276515		Calcium-dependent phosphotriesterase superfamily protein
A0A1D6K0B2	A0A1D6K0B2_MAIZE	unreviewed		Zea mays (Maize)	Zm00001eb014730			Enhancer of zeste3
A0A1D6K0B3	A0A1D6K0B3_MAIZE	unreviewed		Zea mays (Maize)	Zm00001eb014730			[Histone H3]-lysine(27) N-trimethyltransferase (EC 2.1.1.356)
A0A1D6K0B6	A0A1D6K0B6_MAIZE	unreviewed		Zea mays (Maize)	Zm00001eb014730			[Histone H3]-lysine(27) N-trimethyltransferase (EC 2.1.1.356)
A0A1D6K0B7	A0A1D6K0B7_MAIZE	unreviewed		Zea mays (Maize)	Zm00001eb014730			[Histone H3]-lysine(27) N-trimethyltransferase (EC 2.1.1.356)
A0A1D6K0B9	A0A1D6K0B9_MAIZE	unreviewed		Zea mays (Maize)	Zm00001eb014730			[Histone H3]-lysine(27) N-trimethyltransferase (EC 2.1.1.356)
A0A1D6K0C0	A0A1D6K0C0_MAIZE	unreviewed		Zea mays (Maize)	Zm00001eb014730			[Histone H3]-lysine(27) N-trimethyltransferase (EC 2.1.1.356)
A0A1D6K0C1	A0A1D6K0C1_MAIZE	unreviewed		Zea mays (Maize)	Zm00001eb014730			[Histone H3]-lysine(27) N-trimethyltransferase (EC 2.1.1.356)
A0A1D6K0C2	A0A1D6K0C2_MAIZE	unreviewed		Zea mays (Maize)	Zm00001eb014730			[Histone H3]-lysine(27) N-trimethyltransferase (EC 2.1.1.356)
A0A1D6K0C3	A0A1D6K0C3_MAIZE	unreviewed	541955	Zea mays (Maize)	Zm00001eb014730	541955		[Histone H3]-lysine(27) N-trimethyltransferase (EC 2.1.1.356)
A0A1D6K0C7	A0A1D6K0C7_MAIZE	unreviewed	541955	Zea mays (Maize)	Zm00001eb014730	541955		[Histone H3]-lysine(27) N-trimethyltransferase (EC 2.1.1.356)
A0A317YK64	A0A317YK64_MAIZE	unreviewed		Zea mays (Maize)	Zm00001eb014730			[Histone H3]-lysine(27) N-trimethyltransferase (EC 2.1.1.356)
Q8S4P4	EZ3_MAIZE	reviewed	EZ3	Zea mays (Maize)	Zm00001eb014730	EZ3	MEZ3	Histone-lysine N-methyltransferase EZ3 (EC 2.1.1.356) (Enhancer of zeste protein 3)
A0A1D6K181	A0A1D6K181_MAIZE	unreviewed		Zea mays (Maize)	Zm00001eb015460			Exostosin family protein
A0A3L6D8L1	A0A3L6D8L1_MAIZE	unreviewed	ARAD1_7	Zea mays (Maize)	Zm00001eb015460	ARAD1_7		Putative arabinosyltransferase ARAD1
B4FJA4	B4FJA4_MAIZE	unreviewed	100216694	Zea mays (Maize)	Zm00001eb015460	100216694		Exostosin family protein
A0A3L6D7I8	A0A3L6D7I8_MAIZE	unreviewed		Zea mays (Maize)	Zm00001eb015470			Uncharacterized protein
B4FLX3	B4FLX3_MAIZE	unreviewed		Zea mays (Maize)	Zm00001eb015470			Uncharacterized conserved protein UCP022280
B4FUW7	B4FUW7_MAIZE	unreviewed	100276044	Zea mays (Maize)	Zm00001eb015470	100276044		Uncharacterized conserved protein UCP022280
B6U0D3	B6U0D3_MAIZE	unreviewed		Zea mays (Maize)	Zm00001eb015470			Uncharacterized protein
K7UGQ0	K7UGQ0_MAIZE	unreviewed		Zea mays (Maize)	Zm00001eb015470			Uncharacterized conserved protein UCP022280
A0A1D6K186	A0A1D6K186_MAIZE	unreviewed		Zea mays (Maize)	Zm00001eb015480			RING/U-box superfamily protein
A0A1D6K3D8	A0A1D6K3D8_MAIZE	unreviewed		Zea mays (Maize)	Zm00001eb017130			Beta-adaptin-like protein C
A0A1D6K3D9	A0A1D6K3D9_MAIZE	unreviewed		Zea mays (Maize)	Zm00001eb017130			Beta-adaptin-like protein C
A0A317YJF7	A0A317YJF7_MAIZE	unreviewed	BETAC-AD_1	Zea mays (Maize)	Zm00001eb017130	BETAC-AD_1		Beta-adaptin-like protein
A0A1D6K8H5	A0A1D6K8H5_MAIZE	unreviewed	103637658	Zea mays (Maize)	Zm00001eb023400	103637658		Expansin-B4
A0A317YG61	A0A317YG61_MAIZE	unreviewed	EXPB3_3	Zea mays (Maize)	Zm00001eb023400	EXPB3_3		Expansin-B3
A0A1D6K9I0	A0A1D6K9I0_MAIZE	unreviewed		Zea mays (Maize)	Zm00001eb024900			Putative WEB family protein chloroplastic
A0A1D6K9I1	A0A1D6K9I1_MAIZE	unreviewed		Zea mays (Maize)	Zm00001eb024900			Putative WEB family protein chloroplastic
A0A1D6K9I3	A0A1D6K9I3_MAIZE	unreviewed		Zea mays (Maize)	Zm00001eb024900			Putative WEB family protein chloroplastic
A0A1D6K9I4	A0A1D6K9I4_MAIZE	unreviewed		Zea mays (Maize)	Zm00001eb024900			Putative WEB family protein chloroplastic
A0A317YJ55	A0A317YJ55_MAIZE	unreviewed	At1g65010_0	Zea mays (Maize)	Zm00001eb024900	At1g65010_0		Putative WEB family protein
B6T9D1	B6T9D1_MAIZE	unreviewed		Zea mays (Maize)	Zm00001eb024900			Uncharacterized protein
A0A1D6KCW0	A0A1D6KCW0_MAIZE	unreviewed		Zea mays (Maize)	Zm00001eb027900			Spermidine hydroxycinnamoyl transferase
A0A1D6KCW1	A0A1D6KCW1_MAIZE	unreviewed	103639152	Zea mays (Maize)	Zm00001eb027900	103639152		Hydroxycinnamoyltransferase4
A0A317YDE7	A0A317YDE7_MAIZE	unreviewed	THT2_0	Zea mays (Maize)	Zm00001eb027900	THT2_0	THT2_1	Tryptamine hydroxycinnamoyltransferase 2
A0A1D6KD97	A0A1D6KD97_MAIZE	unreviewed		Zea mays (Maize)	Zm00001eb028520			Putative prefoldin subunit 3
A0A1D6KD99	A0A1D6KD99_MAIZE	unreviewed		Zea mays (Maize)	Zm00001eb028520			Prefoldin subunit 3
A0A1D6KDA0	A0A1D6KDA0_MAIZE	unreviewed		Zea mays (Maize)	Zm00001eb028520			Putative prefoldin subunit 3
A0A1D6KDA1	A0A1D6KDA1_MAIZE	unreviewed		Zea mays (Maize)	Zm00001eb028520			Putative prefoldin subunit 3
A0A1D6KDA2	A0A1D6KDA2_MAIZE	unreviewed		Zea mays (Maize)	Zm00001eb028520			Putative prefoldin subunit 3
A0A1D6KDA5	A0A1D6KDA5_MAIZE	unreviewed		Zea mays (Maize)	Zm00001eb028520			Putative prefoldin subunit 3
A0A317Y510	A0A317Y510_MAIZE	unreviewed		Zea mays (Maize)	Zm00001eb028520			Prefoldin subunit 3
B4FQ18	B4FQ18_MAIZE	unreviewed	100283660	Zea mays (Maize)	Zm00001eb028520	100283660		Prefoldin subunit 3
B6TKE7	B6TKE7_MAIZE	unreviewed		Zea mays (Maize)	Zm00001eb028520			Prefoldin subunit 3
A0A1D6KJL3	A0A1D6KJL3_MAIZE	unreviewed		Zea mays (Maize)	Zm00001eb035870			Uncharacterized protein
A0A1D6H7R0	A0A1D6H7R0_MAIZE	unreviewed		Zea mays (Maize)	Zm00001eb035880			Uncharacterized protein
A0A1D6H7T3	A0A1D6H7T3_MAIZE	unreviewed		Zea mays (Maize)	Zm00001eb035880			Uncharacterized protein
A0A1D6H7T8	A0A1D6H7T8_MAIZE	unreviewed		Zea mays (Maize)	Zm00001eb035880			Uncharacterized protein
A0A1D6KJL5	A0A1D6KJL5_MAIZE	unreviewed		Zea mays (Maize)	Zm00001eb035880			Uncharacterized protein
A0A060D196	A0A060D196_MAIZE	unreviewed	TRAF12	Zea mays (Maize)	Zm00001eb035890	TRAF12		TRAF transcription factor (Fragment)
A0A1D6KJL6	A0A1D6KJL6_MAIZE	unreviewed		Zea mays (Maize)	Zm00001eb035890			TD and POZ domain-containing protein 3
A0A060D1K8	A0A060D1K8_MAIZE	unreviewed	Orphan171	Zea mays (Maize)	Zm00001eb035900	Orphan171	103645152	Orphans transcription factor (Fragment)
A0A1D6KJL7	A0A1D6KJL7_MAIZE	unreviewed		Zea mays (Maize)	Zm00001eb035900			TD and POZ domain-containing protein 3
A0A317Y0C3	A0A317Y0C3_MAIZE	unreviewed	BPM1_5	Zea mays (Maize)	Zm00001eb035900	BPM1_5		BTB/POZ and MATH domain-containing protein 1
A0A317Y3B1	A0A317Y3B1_MAIZE	unreviewed	BPM2_2	Zea mays (Maize)	Zm00001eb035900	BPM2_2		BTB/POZ and MATH domain-containing protein 2
A0A317Y7N8	A0A317Y7N8_MAIZE	unreviewed	BPM1_3	Zea mays (Maize)	Zm00001eb035900	BPM1_3		BTB/POZ and MATH domain-containing protein 1
A0A060D7E9	A0A060D7E9_MAIZE	unreviewed	TRAF44	Zea mays (Maize)	Zm00001eb035910	TRAF44	103645153	TD and POZ domain-containing protein 3 (TRAF transcription factor) (Fragment)
B4FH76	B4FH76_MAIZE	unreviewed	103643135	Zea mays (Maize)	Zm00001eb037870	103643135		Uncharacterized protein
A0A1D6KL80	A0A1D6KL80_MAIZE	unreviewed		Zea mays (Maize)	Zm00001eb037880			Class I glutamine amidotransferase-like superfamily protein
A0A317YEH9	A0A317YEH9_MAIZE	unreviewed	ntpR_0	Zea mays (Maize)	Zm00001eb037880	ntpR_0		Protein NtpR
B4FP54	B4FP54_MAIZE	unreviewed		Zea mays (Maize)	Zm00001eb037880			Class I glutamine amidotransferase-like superfamily protein
A0A1D6KL82	A0A1D6KL82_MAIZE	unreviewed		Zea mays (Maize)	Zm00001eb037890			HVA22-like protein
A0A1D6KL84	A0A1D6KL84_MAIZE	unreviewed		Zea mays (Maize)	Zm00001eb037890			HVA22-like protein
A0A1D6KL85	A0A1D6KL85_MAIZE	unreviewed		Zea mays (Maize)	Zm00001eb037890			HVA22-like protein
A0A317YEL3	A0A317YEL3_MAIZE	unreviewed		Zea mays (Maize)	Zm00001eb037890			HVA22-like protein
B6SJ60	B6SJ60_MAIZE	unreviewed		Zea mays (Maize)	Zm00001eb037890			HVA22-like protein
B6SJY6	B6SJY6_MAIZE	unreviewed		Zea mays (Maize)	Zm00001eb037890			HVA22-like protein
A0A317Y307	A0A317Y307_MAIZE	unreviewed		Zea mays (Maize)	Zm00001eb037910			Uncharacterized protein
B6T092	B6T092_MAIZE	unreviewed	100275867	Zea mays (Maize)	Zm00001eb037910	100275867		F-box domain containing protein-like
A0A1D6KLJ5	A0A1D6KLJ5_MAIZE	unreviewed		Zea mays (Maize)	Zm00001eb038490			Structural maintenance of chromosomes protein
A0A1D6KLJ7	A0A1D6KLJ7_MAIZE	unreviewed		Zea mays (Maize)	Zm00001eb038490			Structural maintenance of chromosomes protein
A0A1D6KLJ9	A0A1D6KLJ9_MAIZE	unreviewed		Zea mays (Maize)	Zm00001eb038490			Structural maintenance of chromosomes (SMC) family protein
A0A1D6KLK1	A0A1D6KLK1_MAIZE	unreviewed		Zea mays (Maize)	Zm00001eb038490			Structural maintenance of chromosomes protein
A0A1D6KLK9	A0A1D6KLK9_MAIZE	unreviewed		Zea mays (Maize)	Zm00001eb038490			Structural maintenance of chromosomes protein
A0A1D6KLL0	A0A1D6KLL0_MAIZE	unreviewed		Zea mays (Maize)	Zm00001eb038490			Structural maintenance of chromosomes (SMC) family protein
A0A1D6KLL2	A0A1D6KLL2_MAIZE	unreviewed		Zea mays (Maize)	Zm00001eb038490			Structural maintenance of chromosomes protein
A0A1D6KLL5	A0A1D6KLL5_MAIZE	unreviewed		Zea mays (Maize)	Zm00001eb038490			Structural maintenance of chromosomes (SMC) family protein
A0A1D6KLM0	A0A1D6KLM0_MAIZE	unreviewed		Zea mays (Maize)	Zm00001eb038490			Structural maintenance of chromosomes (SMC) family protein
A0A1D6KLM3	A0A1D6KLM3_MAIZE	unreviewed		Zea mays (Maize)	Zm00001eb038490			Structural maintenance of chromosomes protein
A0A1D6KLM4	A0A1D6KLM4_MAIZE	unreviewed		Zea mays (Maize)	Zm00001eb038490			Structural maintenance of chromosomes protein
A0A1D6KLP3	A0A1D6KLP3_MAIZE	unreviewed		Zea mays (Maize)	Zm00001eb038490			Structural maintenance of chromosomes (SMC) family protein
A0A317Y8S1	A0A317Y8S1_MAIZE	unreviewed		Zea mays (Maize)	Zm00001eb038490			Structural maintenance of chromosomes protein 1
A0A1D6KLP5	A0A1D6KLP5_MAIZE	unreviewed	100277273	Zea mays (Maize)	Zm00001eb038500	100277273		ENTH/VHS family protein
A0A317YBA4	A0A317YBA4_MAIZE	unreviewed	SPCC794.11c	Zea mays (Maize)	Zm00001eb038500	SPCC794.11c		ENTH domain-containing protein C794.11c
B6TS18	B6TS18_MAIZE	unreviewed		Zea mays (Maize)	Zm00001eb038500			ENTH domain-containing protein
A0A1D6KLP6	A0A1D6KLP6_MAIZE	unreviewed		Zea mays (Maize)	Zm00001eb038510			PMP
A0A1D6KLP8	A0A1D6KLP8_MAIZE	unreviewed		Zea mays (Maize)	Zm00001eb038510			PMP
A0A1D6KLP9	A0A1D6KLP9_MAIZE	unreviewed		Zea mays (Maize)	Zm00001eb038510			PMP
A0A317Y940	A0A317Y940_MAIZE	unreviewed		Zea mays (Maize)	Zm00001eb038510			Uncharacterized protein
B6T6X0	B6T6X0_MAIZE	unreviewed	100276220	Zea mays (Maize)	Zm00001eb038510	100276220		PMP
A0A1D6KMQ7	A0A1D6KMQ7_MAIZE	unreviewed		Zea mays (Maize)	Zm00001eb039560			Pyrimidine-specific ribonucleoside hydrolase rihA
A0A1D6MPD8	A0A1D6MPD8_MAIZE	unreviewed		Zea mays (Maize)	Zm00001eb039560			Putative uridine nucleosidase 2
A0A317Y3M8	A0A317Y3M8_MAIZE	unreviewed		Zea mays (Maize)	Zm00001eb039560			Putative uridine nucleosidase 1
B4FE16	B4FE16_MAIZE	unreviewed		Zea mays (Maize)	Zm00001eb039560			IU_nuc_hydro domain-containing protein
B6THD4	B6THD4_MAIZE	unreviewed	542168	Zea mays (Maize)	Zm00001eb039560	542168		Pyrimidine-specific ribonucleoside hydrolase rihA
Q6PPF8	Q6PPF8_MAIZE	unreviewed		Zea mays (Maize)	Zm00001eb039560			Putative inosine-uridine preferring nucleoside hydrolase
A0A1D6KMQ9	A0A1D6KMQ9_MAIZE	unreviewed	103643196	Zea mays (Maize)	Zm00001eb039570	103643196		Fatty acyl-CoA reductase (EC 1.2.1.84)
A0A317Y6E0	A0A317Y6E0_MAIZE	unreviewed	FAR4	Zea mays (Maize)	Zm00001eb039570	FAR4		Fatty acyl-CoA reductase (EC 1.2.1.84)
A0A1D6KMR1	A0A1D6KMR1_MAIZE	unreviewed		Zea mays (Maize)	Zm00001eb039590			Histidine-containing phosphotransfer protein 1
Q9ST01	Q9ST01_MAIZE	unreviewed	ZmHP1	Zea mays (Maize)	Zm00001eb039590	ZmHP1	542586	Histidine-containing phosphotransfer protein (Histidine-containing phosphotransfer protein 1) (Histidine-containing phosphotransfer protein 5)
A0A1D6KMR4	A0A1D6KMR4_MAIZE	unreviewed		Zea mays (Maize)	Zm00001eb039600			Uncharacterized protein
A0A317Y3N7	A0A317Y3N7_MAIZE	unreviewed		Zea mays (Maize)	Zm00001eb039600			Uncharacterized protein
A0A1D6KMR6	A0A1D6KMR6_MAIZE	unreviewed		Zea mays (Maize)	Zm00001eb039610			Low molecular weight protein-tyrosine-phosphatase slr0328
A0A1D6KMR7	A0A1D6KMR7_MAIZE	unreviewed		Zea mays (Maize)	Zm00001eb039610			Low molecular weight protein-tyrosine-phosphatase slr0328
A0A1D6KMR8	A0A1D6KMR8_MAIZE	unreviewed		Zea mays (Maize)	Zm00001eb039610			Acid phosphatase (EC 3.1.3.2)
A0A317YG64	A0A317YG64_MAIZE	unreviewed	slr0328_0	Zea mays (Maize)	Zm00001eb039610	slr0328_0		Acid phosphatase (EC 3.1.3.2)
A0A3L6DIP0	A0A3L6DIP0_MAIZE	unreviewed	slr0328_1	Zea mays (Maize)	Zm00001eb039610	slr0328_1		Putative low molecular weight protein-tyrosine-phosphatase slr0328
B6T2X9	B6T2X9_MAIZE	unreviewed		Zea mays (Maize)	Zm00001eb039610			Acid phosphatase (EC 3.1.3.2)
B6TIW5	B6TIW5_MAIZE	unreviewed	100283495	Zea mays (Maize)	Zm00001eb039610	100283495		Acid phosphatase (EC 3.1.3.2)
C0HG04	C0HG04_MAIZE	unreviewed		Zea mays (Maize)	Zm00001eb039610			Acid phosphatase (EC 3.1.3.2)
C4J0N5	C4J0N5_MAIZE	unreviewed		Zea mays (Maize)	Zm00001eb039610			LMWPc domain-containing protein
K7V716	K7V716_MAIZE	unreviewed		Zea mays (Maize)	Zm00001eb040320			Uncharacterized protein
A0A1D6KNA5	A0A1D6KNA5_MAIZE	unreviewed		Zea mays (Maize)	Zm00001eb040330			Uncharacterized protein
A0A3L6DDV2	A0A3L6DDV2_MAIZE	unreviewed	CYCD4-1_2	Zea mays (Maize)	Zm00001eb040330	CYCD4-1_2		Cyclin-D4-1
A0A1D6KNA8	A0A1D6KNA8_MAIZE	unreviewed		Zea mays (Maize)	Zm00001eb040340			Uncharacterized protein
A0A1D6KNA9	A0A1D6KNA9_MAIZE	unreviewed		Zea mays (Maize)	Zm00001eb040340			Uncharacterized protein
A0A1D6MYG2	A0A1D6MYG2_MAIZE	unreviewed		Zea mays (Maize)	Zm00001eb040340			Uncharacterized protein
A0A317Y6K5	A0A317Y6K5_MAIZE	unreviewed		Zea mays (Maize)	Zm00001eb040340			Uncharacterized protein
A0A317Y7Q5	A0A317Y7Q5_MAIZE	unreviewed		Zea mays (Maize)	Zm00001eb040340			Uncharacterized protein
A0A317YGD4	A0A317YGD4_MAIZE	unreviewed		Zea mays (Maize)	Zm00001eb040340			Uncharacterized protein
A0A3L6FDK9	A0A3L6FDK9_MAIZE	unreviewed		Zea mays (Maize)	Zm00001eb040340			Uncharacterized protein
A0A317YE20	A0A317YE20_MAIZE	unreviewed		Zea mays (Maize)	Zm00001eb040350			Uncharacterized protein
B6U9R2	B6U9R2_MAIZE	unreviewed		Zea mays (Maize)	Zm00001eb040350			Uncharacterized protein
C4J1E8	C4J1E8_MAIZE	unreviewed	100278496	Zea mays (Maize)	Zm00001eb040350	100278496		Ferredoxin-related
A0A1D6KNB1	A0A1D6KNB1_MAIZE	unreviewed		Zea mays (Maize)	Zm00001eb040360			Uncharacterized protein
A0A1D6PJ57	A0A1D6PJ57_MAIZE	unreviewed		Zea mays (Maize)	Zm00001eb040360			F-box/kelch-repeat protein SKIP11
A0A317YFM8	A0A317YFM8_MAIZE	unreviewed	RR31	Zea mays (Maize)	Zm00001eb040360	RR31		Two-component response regulator ORR31
A0A317YFS6	A0A317YFS6_MAIZE	unreviewed		Zea mays (Maize)	Zm00001eb040360			Uncharacterized protein
A0A3L6EUU5	A0A3L6EUU5_MAIZE	unreviewed		Zea mays (Maize)	Zm00001eb040360			Uncharacterized protein
A0A1D6KNB2	A0A1D6KNB2_MAIZE	unreviewed	103643235	Zea mays (Maize)	Zm00001eb040370	103643235		Response regulatory domain-containing protein
A0A1D6KNB3	A0A1D6KNB3_MAIZE	unreviewed	103643235	Zea mays (Maize)	Zm00001eb040370	103643235		Response regulatory domain-containing protein
A0A1D6KNB4	A0A1D6KNB4_MAIZE	unreviewed	103643235	Zea mays (Maize)	Zm00001eb040370	103643235		Uncharacterized protein
A0A1D6KNB5	A0A1D6KNB5_MAIZE	unreviewed		Zea mays (Maize)	Zm00001eb040370			Uncharacterized protein
A0A1D6KNB6	A0A1D6KNB6_MAIZE	unreviewed		Zea mays (Maize)	Zm00001eb040380			MTD1
A0A1D6KNB7	A0A1D6KNB7_MAIZE	unreviewed		Zea mays (Maize)	Zm00001eb040380			MTD1
A0A1D6KNB8	A0A1D6KNB8_MAIZE	unreviewed		Zea mays (Maize)	Zm00001eb040380			MTD1
A0A317YE53	A0A317YE53_MAIZE	unreviewed		Zea mays (Maize)	Zm00001eb040380			Uncharacterized protein
B6T7B4	B6T7B4_MAIZE	unreviewed		Zea mays (Maize)	Zm00001eb040380			MTD1
A0A1D6KNB9	A0A1D6KNB9_MAIZE	unreviewed		Zea mays (Maize)	Zm00001eb040390			Uncharacterized protein
A0A1D6KNC0	A0A1D6KNC0_MAIZE	unreviewed	103643236	Zea mays (Maize)	Zm00001eb040400	103643236		GTP diphosphokinase (EC 2.7.6.5)
A0A1D6KNC2	A0A1D6KNC2_MAIZE	unreviewed		Zea mays (Maize)	Zm00001eb040400			Putative GTP diphosphokinase RSH2 chloroplastic
A0A317YD15	A0A317YD15_MAIZE	unreviewed		Zea mays (Maize)	Zm00001eb040400			GTP diphosphokinase (EC 2.7.6.5)
A0A1D6KNC3	A0A1D6KNC3_MAIZE	unreviewed		Zea mays (Maize)	Zm00001eb040410			Uncharacterized protein
A0A1D6KNK6	A0A1D6KNK6_MAIZE	unreviewed		Zea mays (Maize)	Zm00001eb040790			4-coumarate--CoA ligase 1
A0A317Y237	A0A317Y237_MAIZE	unreviewed	4CL5	Zea mays (Maize)	Zm00001eb040790	4CL5		Putative 4-coumarate--CoA ligase 5
B4FAY2	B4FAY2_MAIZE	unreviewed		Zea mays (Maize)	Zm00001eb040790			AMP-binding domain-containing protein
A0A1D6KNK7	A0A1D6KNK7_MAIZE	unreviewed		Zea mays (Maize)	Zm00001eb040800			Adenylyl cyclase-associated protein
A0A317Y596	A0A317Y596_MAIZE	unreviewed	CAP1_2	Zea mays (Maize)	Zm00001eb040800	CAP1_2		Cyclase-associated protein 1
A0A1D6KNL1	A0A1D6KNL1_MAIZE	unreviewed		Zea mays (Maize)	Zm00001eb040860			Dentin sialophosphoprotein-related
A0A1D6KNL2	A0A1D6KNL2_MAIZE	unreviewed	103643251	Zea mays (Maize)	Zm00001eb040860	103643251		Dentin sialophosphoprotein-related
A0A1D6KNL3	A0A1D6KNL3_MAIZE	unreviewed		Zea mays (Maize)	Zm00001eb040860			Dentin sialophosphoprotein-related
A0A1D6KNL4	A0A1D6KNL4_MAIZE	unreviewed		Zea mays (Maize)	Zm00001eb040860			Dentin sialophosphoprotein-related
A0A1D6KNL5	A0A1D6KNL5_MAIZE	unreviewed		Zea mays (Maize)	Zm00001eb040860			Dentin sialophosphoprotein-related
A0A1D6PZN4	A0A1D6PZN4_MAIZE	unreviewed		Zea mays (Maize)	Zm00001eb040860			Dentin sialophosphoprotein-related
A0A317Y890	A0A317Y890_MAIZE	unreviewed		Zea mays (Maize)	Zm00001eb040860			Uncharacterized protein
A0A3L6F953	A0A3L6F953_MAIZE	unreviewed		Zea mays (Maize)	Zm00001eb040860			Uncharacterized protein
A0A1D6KNL9	A0A1D6KNL9_MAIZE	unreviewed		Zea mays (Maize)	Zm00001eb040870			Alpha/beta-Hydrolases superfamily protein
A0A1D6KNM0	A0A1D6KNM0_MAIZE	unreviewed		Zea mays (Maize)	Zm00001eb040870			Alpha/beta-Hydrolases superfamily protein
A0A1D6KNM1	A0A1D6KNM1_MAIZE	unreviewed		Zea mays (Maize)	Zm00001eb040870			Alpha/beta-Hydrolases superfamily protein
A0A1D6KNM3	A0A1D6KNM3_MAIZE	unreviewed		Zea mays (Maize)	Zm00001eb040870			Alpha/beta-Hydrolases superfamily protein
A0A1D6KNM4	A0A1D6KNM4_MAIZE	unreviewed		Zea mays (Maize)	Zm00001eb040870			Alpha/beta-Hydrolases superfamily protein
A0A1D6KNM5	A0A1D6KNM5_MAIZE	unreviewed		Zea mays (Maize)	Zm00001eb040870			Alpha/beta-Hydrolases superfamily protein
A0A317Y1V3	A0A317Y1V3_MAIZE	unreviewed		Zea mays (Maize)	Zm00001eb040870			Putative lipase ROG1
B6SYS8	B6SYS8_MAIZE	unreviewed	100281777	Zea mays (Maize)	Zm00001eb040870	100281777		Alpha/beta-Hydrolases superfamily protein (Serine esterase family protein)
B8A2Q7	B8A2Q7_MAIZE	unreviewed		Zea mays (Maize)	Zm00001eb040870			Uncharacterized protein
B8A3Q7	B8A3Q7_MAIZE	unreviewed		Zea mays (Maize)	Zm00001eb040870			DUF676 domain-containing protein
C0PF36	C0PF36_MAIZE	unreviewed	100281777	Zea mays (Maize)	Zm00001eb040870	100281777		DUF676 domain-containing protein
C0PG13	C0PG13_MAIZE	unreviewed		Zea mays (Maize)	Zm00001eb040870			DUF676 domain-containing protein
A0A1D6KNM6	A0A1D6KNM6_MAIZE	unreviewed	103643252	Zea mays (Maize)	Zm00001eb040880	103643252		Protein ecdysoneless-like protein
A0A1D6KNM7	A0A1D6KNM7_MAIZE	unreviewed		Zea mays (Maize)	Zm00001eb040880			Protein ecdysoneless-like protein
A0A317Y2A1	A0A317Y2A1_MAIZE	unreviewed		Zea mays (Maize)	Zm00001eb040880			Protein ecdysoneless
A0A1D6E5V4	A0A1D6E5V4_MAIZE	unreviewed		Zea mays (Maize)	Zm00001eb042870			Cytokinin-O-glucosyltransferase 1
A0A3L6D6D6	A0A3L6D6D6_MAIZE	unreviewed		Zea mays (Maize)	Zm00001eb042870			Uncharacterized protein
B4FSI4	B4FSI4_MAIZE	unreviewed		Zea mays (Maize)	Zm00001eb042870			Glycosyltransferase (EC 2.4.1.-)
C0P7U4	C0P7U4_MAIZE	unreviewed	100382444	Zea mays (Maize)	Zm00001eb042870	100382444		Glycosyltransferase (EC 2.4.1.-)
C4J5L2	C4J5L2_MAIZE	unreviewed		Zea mays (Maize)	Zm00001eb042870			Glycosyltransferase (EC 2.4.1.-)
A0A1D6KQB6	A0A1D6KQB6_MAIZE	unreviewed		Zea mays (Maize)	Zm00001eb042890			Uncharacterized protein
A0A1D6KQB9	A0A1D6KQB9_MAIZE	unreviewed		Zea mays (Maize)	Zm00001eb042890			Uncharacterized protein
A0A1D6KQC1	A0A1D6KQC1_MAIZE	unreviewed		Zea mays (Maize)	Zm00001eb042890			Uncharacterized protein
A0A1D6KQC3	A0A1D6KQC3_MAIZE	unreviewed	103643343	Zea mays (Maize)	Zm00001eb042890	103643343		Uncharacterized protein
A0A1D6KQC6	A0A1D6KQC6_MAIZE	unreviewed		Zea mays (Maize)	Zm00001eb042890			Uncharacterized protein
A0A1D6KQC7	A0A1D6KQC7_MAIZE	unreviewed		Zea mays (Maize)	Zm00001eb042890			Uncharacterized protein
A0A317YLK8	A0A317YLK8_MAIZE	unreviewed	RPM1_8	Zea mays (Maize)	Zm00001eb042890	RPM1_8		Disease resistance protein RPM1
A0A1D6KQC8	A0A1D6KQC8_MAIZE	unreviewed		Zea mays (Maize)	Zm00001eb042900			Uncharacterized conserved protein UCP031088 alpha/beta hydrolase
A0A1D6KQC9	A0A1D6KQC9_MAIZE	unreviewed		Zea mays (Maize)	Zm00001eb042900			Uncharacterized conserved protein UCP031088 alpha/beta hydrolase
A0A1D6KQD0	A0A1D6KQD0_MAIZE	unreviewed		Zea mays (Maize)	Zm00001eb042900			Uncharacterized conserved protein UCP031088 alpha/beta hydrolase
A0A1D6KQD1	A0A1D6KQD1_MAIZE	unreviewed		Zea mays (Maize)	Zm00001eb042900			Uncharacterized conserved protein UCP031088 alpha/beta hydrolase
A0A1D6KQD2	A0A1D6KQD2_MAIZE	unreviewed		Zea mays (Maize)	Zm00001eb042900			Uncharacterized conserved protein UCP031088 alpha/beta hydrolase
A0A1D6KQD3	A0A1D6KQD3_MAIZE	unreviewed		Zea mays (Maize)	Zm00001eb042900			Uncharacterized conserved protein UCP031088 alpha/beta hydrolase
A0A1D6KQD4	A0A1D6KQD4_MAIZE	unreviewed		Zea mays (Maize)	Zm00001eb042900			Uncharacterized conserved protein UCP031088 alpha/beta hydrolase
A0A317YLV7	A0A317YLV7_MAIZE	unreviewed		Zea mays (Maize)	Zm00001eb042900			Hydrolase_4 domain-containing protein
C0P985	C0P985_MAIZE	unreviewed		Zea mays (Maize)	Zm00001eb042900			Uncharacterized protein
C4J112	C4J112_MAIZE	unreviewed		Zea mays (Maize)	Zm00001eb042900			Uncharacterized protein
A0A1D6KQD5	A0A1D6KQD5_MAIZE	unreviewed		Zea mays (Maize)	Zm00001eb042910			Uncharacterized protein
A0A1D6KQD7	A0A1D6KQD7_MAIZE	unreviewed		Zea mays (Maize)	Zm00001eb042920			Lipid phosphate phosphatase 2
A0A317Y6M2	A0A317Y6M2_MAIZE	unreviewed	LPP2_4	Zea mays (Maize)	Zm00001eb042920	LPP2_4		Lipid phosphate phosphatase 2
B4FE57	B4FE57_MAIZE	unreviewed		Zea mays (Maize)	Zm00001eb042920			acidPPc domain-containing protein
B4FEX1	B4FEX1_MAIZE	unreviewed		Zea mays (Maize)	Zm00001eb042920			Lipid phosphate phosphatase 2
B6SSC1	B6SSC1_MAIZE	unreviewed	100193193	Zea mays (Maize)	Zm00001eb042920	100193193		Lipid phosphate phosphatase 2 (Lipid phosphate phosphatase 3)
A0A317YFS8	A0A317YFS8_MAIZE	unreviewed		Zea mays (Maize)	Zm00001eb042940			Uncharacterized protein
B4F874	B4F874_MAIZE	unreviewed	100191267	Zea mays (Maize)	Zm00001eb042940	100191267		Acclimation of photosynthesis to environment
B6TPW9	B6TPW9_MAIZE	unreviewed		Zea mays (Maize)	Zm00001eb042940			APE1
A0A1D6KQE2	A0A1D6KQE2_MAIZE	unreviewed	103643345	Zea mays (Maize)	Zm00001eb042960	103643345		Two-component response regulator ARR16
A0A317YE07	A0A317YE07_MAIZE	unreviewed	RR12	Zea mays (Maize)	Zm00001eb042960	RR12		Two-component response regulator ORR12
A0A1D6I1I4	A0A1D6I1I4_MAIZE	unreviewed		Zea mays (Maize)	Zm00001eb042970			Plastid phosphate/phosphoenolpyruvate translocator2
A0A1D6KQE5	A0A1D6KQE5_MAIZE	unreviewed		Zea mays (Maize)	Zm00001eb042970			Phosphoenolpyruvate/phosphate translocator 1 chloroplastic
A0A317YJK6	A0A317YJK6_MAIZE	unreviewed	PPT2_1	Zea mays (Maize)	Zm00001eb042970	PPT2_1		Phosphoenolpyruvate/phosphate translocator 2, chloroplastic
B6TKB3	B6TKB3_MAIZE	unreviewed		Zea mays (Maize)	Zm00001eb042970			Triose phosphate/phosphate translocator, non-green plastid,chloroplast
C0P317	C0P317_MAIZE	unreviewed	100283648	Zea mays (Maize)	Zm00001eb042970	100283648		Phosphoenolpyruvate/phosphate translocator 1 chloroplastic
A0A1D6KR41	A0A1D6KR41_MAIZE	unreviewed	103645327	Zea mays (Maize)	Zm00001eb043820	103645327		HR-like lesion-inducing protein-related
A0A3L6F723	A0A3L6F723_MAIZE	unreviewed	Os03g0283600_9	Zea mays (Maize)	Zm00001eb043820	Os03g0283600_9		Cardiolipin synthase (CMP-forming), mitochondrial
A0A1D6P7S4	A0A1D6P7S4_MAIZE	unreviewed		Zea mays (Maize)	Zm00001eb043830			Calmodulin-binding transcription activator 2
A0A3L6ESD1	A0A3L6ESD1_MAIZE	unreviewed	Os03g0283600_8	Zea mays (Maize)	Zm00001eb043830	Os03g0283600_8		Cardiolipin synthase (CMP-forming), mitochondrial
A0A3L6FKK4	A0A3L6FKK4_MAIZE	unreviewed	Os03g0283600_3	Zea mays (Maize)	Zm00001eb043830	Os03g0283600_3		Cardiolipin synthase (CMP-forming), mitochondrial
A0A1D6KR43	A0A1D6KR43_MAIZE	unreviewed		Zea mays (Maize)	Zm00001eb043850			CRP3-Cysteine-rich family protein expressed
A0A317YF46	A0A317YF46_MAIZE	unreviewed		Zea mays (Maize)	Zm00001eb043850			Uncharacterized protein
B6SXD9	B6SXD9_MAIZE	unreviewed		Zea mays (Maize)	Zm00001eb043850			CRP3-Cysteine-rich family protein expressed
A0A1D6KR47	A0A1D6KR47_MAIZE	unreviewed		Zea mays (Maize)	Zm00001eb043870			F-box domain containing protein
A0A317Y3C0	A0A317Y3C0_MAIZE	unreviewed		Zea mays (Maize)	Zm00001eb043870			F-box domain-containing protein
C0P4M8	C0P4M8_MAIZE	unreviewed	100382124	Zea mays (Maize)	Zm00001eb043870	100382124		F-box domain-containing protein
A0A317Y217	A0A317Y217_MAIZE	unreviewed		Zea mays (Maize)	Zm00001eb043880			F-box domain-containing protein
B6TBN8	B6TBN8_MAIZE	unreviewed		Zea mays (Maize)	Zm00001eb043880			F-box domain containing protein
C0PGZ9	C0PGZ9_MAIZE	unreviewed	100282821	Zea mays (Maize)	Zm00001eb043880	100282821		F-box domain containing protein
C4JBG5	C4JBG5_MAIZE	unreviewed		Zea mays (Maize)	Zm00001eb043880			Uncharacterized protein
A0A1D6KR49	A0A1D6KR49_MAIZE	unreviewed		Zea mays (Maize)	Zm00001eb043890			Uncharacterized protein
A0A317YHL3	A0A317YHL3_MAIZE	unreviewed		Zea mays (Maize)	Zm00001eb043890			Uncharacterized protein
A0A1D6KR50	A0A1D6KR50_MAIZE	unreviewed		Zea mays (Maize)	Zm00001eb043900			Plant invertase/pectin methylesterase inhibitor superfamily protein
A0A317Y789	A0A317Y789_MAIZE	unreviewed	PMEI7	Zea mays (Maize)	Zm00001eb043900	PMEI7		Pectinesterase inhibitor 7
B6UDU5	B6UDU5_MAIZE	unreviewed		Zea mays (Maize)	Zm00001eb043900			Ripening-related protein-like
A0A1D6KR52	A0A1D6KR52_MAIZE	unreviewed		Zea mays (Maize)	Zm00001eb043910			Uncharacterized protein
A0A317Y9U8	A0A317Y9U8_MAIZE	unreviewed		Zea mays (Maize)	Zm00001eb043910			Uncharacterized protein
B6T7T9	B6T7T9_MAIZE	unreviewed		Zea mays (Maize)	Zm00001eb043910			Uncharacterized protein
C4J739	C4J739_MAIZE	unreviewed		Zea mays (Maize)	Zm00001eb043910			Uncharacterized protein
A0A1D6GNE4	A0A1D6GNE4_MAIZE	unreviewed		Zea mays (Maize)	Zm00001eb043920			Methionine aminopeptidase
A0A1D6GNF0	A0A1D6GNF0_MAIZE	unreviewed		Zea mays (Maize)	Zm00001eb043920			Methionine aminopeptidase
A0A1D6KR54	A0A1D6KR54_MAIZE	unreviewed		Zea mays (Maize)	Zm00001eb043920			Methionine aminopeptidase 1A
A0A317Y3T2	A0A317Y3T2_MAIZE	unreviewed	MAP1A_0	Zea mays (Maize)	Zm00001eb043920	MAP1A_0		Methionine aminopeptidase (EC 3.4.11.18)
B4FZK6	B4FZK6_MAIZE	unreviewed		Zea mays (Maize)	Zm00001eb043920			Methionine aminopeptidase (EC 3.4.11.18)
B6TDI9	B6TDI9_MAIZE	unreviewed		Zea mays (Maize)	Zm00001eb043920			Methionine aminopeptidase (EC 3.4.11.18)
A0A1D6KWY2	A0A1D6KWY2_MAIZE	unreviewed		Zea mays (Maize)	Zm00001eb050270			Cupredoxin superfamily protein
A0A1D6P6T9	A0A1D6P6T9_MAIZE	unreviewed		Zea mays (Maize)	Zm00001eb050270			CAI-1 autoinducer sensor kinase/phosphatase cqsS isoform 1
A0A317Y782	A0A317Y782_MAIZE	unreviewed	BCB	Zea mays (Maize)	Zm00001eb050270	BCB		Blue copper protein
C0HGZ8	C0HGZ8_MAIZE	unreviewed		Zea mays (Maize)	Zm00001eb050270			DDE Tnp4 domain-containing protein
A0A1D6KYH2	A0A1D6KYH2_MAIZE	unreviewed		Zea mays (Maize)	Zm00001eb051830			Serine/threonine protein phosphatase 2A regulatory subunit
A0A317Y8K2	A0A317Y8K2_MAIZE	unreviewed		Zea mays (Maize)	Zm00001eb051830			Serine/threonine protein phosphatase 2A regulatory subunit
B6SGQ1	B6SGQ1_MAIZE	unreviewed	100280472	Zea mays (Maize)	Zm00001eb051830	100280472		Serine/threonine protein phosphatase 2A regulatory subunit
A0A1D6KYH9	A0A1D6KYH9_MAIZE	unreviewed		Zea mays (Maize)	Zm00001eb051840			Dual specificity protein phosphatase 1B
A0A1D6KYI0	A0A1D6KYI0_MAIZE	unreviewed		Zea mays (Maize)	Zm00001eb051840			Dual specificity protein phosphatase 1B
A0A1D6KYI2	A0A1D6KYI2_MAIZE	unreviewed		Zea mays (Maize)	Zm00001eb051840			Dual specificity protein phosphatase 1B
A0A1D6KYI4	A0A1D6KYI4_MAIZE	unreviewed		Zea mays (Maize)	Zm00001eb051840			Dual specificity protein phosphatase 1B
A0A1D6KYI5	A0A1D6KYI5_MAIZE	unreviewed		Zea mays (Maize)	Zm00001eb051840			Dual specificity protein phosphatase 1B
A0A1D6KYI7	A0A1D6KYI7_MAIZE	unreviewed		Zea mays (Maize)	Zm00001eb051840			Dual specificity protein phosphatase 1B
A0A1D6KYI8	A0A1D6KYI8_MAIZE	unreviewed		Zea mays (Maize)	Zm00001eb051840			Dual specificity protein phosphatase 1B
A0A317Y841	A0A317Y841_MAIZE	unreviewed	DSPTP1	Zea mays (Maize)	Zm00001eb051840	DSPTP1		Dual specificity protein phosphatase 1
B4FDZ4	B4FDZ4_MAIZE	unreviewed		Zea mays (Maize)	Zm00001eb051840			Dual specificity protein phosphatase 1B
B4FEX5	B4FEX5_MAIZE	unreviewed		Zea mays (Maize)	Zm00001eb051840			Dual specificity protein phosphatase 1B
B4FN89	B4FN89_MAIZE	unreviewed		Zea mays (Maize)	Zm00001eb051840			Dual specificity protein phosphatase 1B
B6SJK1	B6SJK1_MAIZE	unreviewed		Zea mays (Maize)	Zm00001eb051840			Dual specificity protein phosphatase 9
B6U8T7	B6U8T7_MAIZE	unreviewed		Zea mays (Maize)	Zm00001eb051840			Uncharacterized protein
Q3S4H6	Q3S4H6_MAIZE	unreviewed		Zea mays (Maize)	Zm00001eb051840			Dual-specificity protein-like phosphatase 2
A0A1D6KYS5	A0A1D6KYS5_MAIZE	unreviewed		Zea mays (Maize)	Zm00001eb052030			Uncharacterized protein
A0A317Y8N8	A0A317Y8N8_MAIZE	unreviewed		Zea mays (Maize)	Zm00001eb052050			Uncharacterized protein
B6U1Q5	B6U1Q5_MAIZE	unreviewed		Zea mays (Maize)	Zm00001eb052050			Uncharacterized protein
C0PD78	C0PD78_MAIZE	unreviewed	100277915	Zea mays (Maize)	Zm00001eb052050	100277915		Uncharacterized protein
A0A1D6L048	A0A1D6L048_MAIZE	unreviewed	103643830	Zea mays (Maize)	Zm00001eb053540	103643830		Basic helix-loop-helix (BHLH) DNA-binding superfamily protein
A0A1D6L049	A0A1D6L049_MAIZE	unreviewed		Zea mays (Maize)	Zm00001eb053540			Basic helix-loop-helix (BHLH) DNA-binding superfamily protein
A0A1D6L050	A0A1D6L050_MAIZE	unreviewed		Zea mays (Maize)	Zm00001eb053540			Basic helix-loop-helix (BHLH) DNA-binding superfamily protein
A0A317YJU7	A0A317YJU7_MAIZE	unreviewed	At4g38062_0	Zea mays (Maize)	Zm00001eb053540	At4g38062_0		Uncharacterized protein
A0A1D6L051	A0A1D6L051_MAIZE	unreviewed		Zea mays (Maize)	Zm00001eb053550			Octicosapeptide/Phox/Bem1p family protein
A0A317YJK8	A0A317YJK8_MAIZE	unreviewed		Zea mays (Maize)	Zm00001eb053550			PB1 domain-containing protein
A0A1D6L052	A0A1D6L052_MAIZE	unreviewed		Zea mays (Maize)	Zm00001eb053560			Acid phosphatase (EC 3.1.3.2)
A0A317YLV6	A0A317YLV6_MAIZE	unreviewed	PAP3_5	Zea mays (Maize)	Zm00001eb053560	PAP3_5		Purple acid phosphatase 3
A0A3L6E9U0	A0A3L6E9U0_MAIZE	unreviewed	PAP3_1	Zea mays (Maize)	Zm00001eb053560	PAP3_1		Purple acid phosphatase 3
A0A1D6L5T6	A0A1D6L5T6_MAIZE	unreviewed		Zea mays (Maize)	Zm00001eb058420			Uncharacterized protein
A0A1D6L5U6	A0A1D6L5U6_MAIZE	unreviewed		Zea mays (Maize)	Zm00001eb058450			SWIB complex BAF60b domain-containing protein
A0A1D6L5U7	A0A1D6L5U7_MAIZE	unreviewed		Zea mays (Maize)	Zm00001eb058450			SWIB complex BAF60b domain-containing protein
A0A317Y3Q9	A0A317Y3Q9_MAIZE	unreviewed		Zea mays (Maize)	Zm00001eb058450			DEK C-terminal domain-containing protein
A0A317Y5F5	A0A317Y5F5_MAIZE	unreviewed		Zea mays (Maize)	Zm00001eb058450			Upstream activation factor subunit spp27
B6SZA4	B6SZA4_MAIZE	unreviewed		Zea mays (Maize)	Zm00001eb058450			SWIB/MDM2 domain containing protein
A0A1D6L6E0	A0A1D6L6E0_MAIZE	unreviewed		Zea mays (Maize)	Zm00001eb059160			Methyltransferase (EC 2.1.1.-)
A0A1D6L6E1	A0A1D6L6E1_MAIZE	unreviewed		Zea mays (Maize)	Zm00001eb059160			Methyltransferase (EC 2.1.1.-)
A0A1D6L6E2	A0A1D6L6E2_MAIZE	unreviewed		Zea mays (Maize)	Zm00001eb059160			Methyltransferase (EC 2.1.1.-)
A0A1D6L6E3	A0A1D6L6E3_MAIZE	unreviewed		Zea mays (Maize)	Zm00001eb059160			Methyltransferase (EC 2.1.1.-)
A0A1D6L6E4	A0A1D6L6E4_MAIZE	unreviewed		Zea mays (Maize)	Zm00001eb059160			Methyltransferase (EC 2.1.1.-)
A0A317YG62	A0A317YG62_MAIZE	unreviewed	TYW1	Zea mays (Maize)	Zm00001eb059160	TYW1		tRNA 4-demethylwyosine synthase (AdoMet-dependent) (EC 4.1.3.44)
A0A1D6L6E5	A0A1D6L6E5_MAIZE	unreviewed		Zea mays (Maize)	Zm00001eb059170			tRNA 4-demethylwyosine synthase (AdoMet-dependent) (EC 4.1.3.44)
B4FXB4	B4FXB4_MAIZE	unreviewed		Zea mays (Maize)	Zm00001eb059170			Uncharacterized protein
A0A1D6L6E7	A0A1D6L6E7_MAIZE	unreviewed		Zea mays (Maize)	Zm00001eb059180			Dolichol-phosphate mannosyltransferase subunit 3
A0A317YDY0	A0A317YDY0_MAIZE	unreviewed		Zea mays (Maize)	Zm00001eb059180			Dolichol-phosphate mannosyltransferase subunit 3
A0A317YE44	A0A317YE44_MAIZE	unreviewed		Zea mays (Maize)	Zm00001eb059180			Dolichol-phosphate mannosyltransferase subunit 3
B4FHW9	B4FHW9_MAIZE	unreviewed		Zea mays (Maize)	Zm00001eb059180			Dolichol-phosphate mannosyltransferase subunit 3
B4FTZ5	B4FTZ5_MAIZE	unreviewed	100194221	Zea mays (Maize)	Zm00001eb059180	100194221		Dolichol-phosphate mannosyltransferase subunit 3
A0A1D6L6E9	A0A1D6L6E9_MAIZE	unreviewed		Zea mays (Maize)	Zm00001eb059190			Pentatricopeptide repeat-containing protein
A0A317YBD2	A0A317YBD2_MAIZE	unreviewed	PCMP-H41_0	Zea mays (Maize)	Zm00001eb059190	PCMP-H41_0		Pentatricopeptide repeat-containing protein
A0A1D6L6F1	A0A1D6L6F1_MAIZE	unreviewed		Zea mays (Maize)	Zm00001eb059210			Protein AE7-like 1
A0A317YBH8	A0A317YBH8_MAIZE	unreviewed	AEL1	Zea mays (Maize)	Zm00001eb059210	AEL1		Protein AE7-like 1
B4FPP4	B4FPP4_MAIZE	unreviewed	100272631	Zea mays (Maize)	Zm00001eb059210	100272631		Protein AE7-like 1
A0A1D6L6F2	A0A1D6L6F2_MAIZE	unreviewed		Zea mays (Maize)	Zm00001eb059220			Erythronate-4-phosphate dehydrogenase family protein
A0A317YEK4	A0A317YEK4_MAIZE	unreviewed	At1g01500_2	Zea mays (Maize)	Zm00001eb059220	At1g01500_2		Uncharacterized protein
A0A3L6EQY3	A0A3L6EQY3_MAIZE	unreviewed	At1g01500_3	Zea mays (Maize)	Zm00001eb059220	At1g01500_3		Uncharacterized protein
A0A1D6LAW3	A0A1D6LAW3_MAIZE	unreviewed		Zea mays (Maize)	Zm00001eb063860			Elongation factor 2
A0A1D6LB92	A0A1D6LB92_MAIZE	unreviewed		Zea mays (Maize)	Zm00001eb063860			Elongation factor 2 (Putative translation elongation factor family protein)
A0A096UDU8	A0A096UDU8_MAIZE	unreviewed	100274271	Zea mays (Maize)	Zm00001eb063870	100274271		Nicotinate phosphoribosyltransferase (EC 6.3.4.21)
A0A1D6LB96	A0A1D6LB96_MAIZE	unreviewed		Zea mays (Maize)	Zm00001eb063870			Nicotinate phosphoribosyltransferase (EC 6.3.4.21)
A0A1D6LB97	A0A1D6LB97_MAIZE	unreviewed		Zea mays (Maize)	Zm00001eb063870			Nicotinate phosphoribosyltransferase (EC 6.3.4.21)
A0A1D6LBA0	A0A1D6LBA0_MAIZE	unreviewed		Zea mays (Maize)	Zm00001eb063870			Nicotinate phosphoribosyltransferase (EC 6.3.4.21)
A0A1D6LBA2	A0A1D6LBA2_MAIZE	unreviewed		Zea mays (Maize)	Zm00001eb063870			Nicotinate phosphoribosyltransferase (EC 6.3.4.21)
A0A1D6LBA5	A0A1D6LBA5_MAIZE	unreviewed	100274271	Zea mays (Maize)	Zm00001eb063870	100274271		Nicotinate phosphoribosyltransferase (EC 6.3.4.21)
A0A1D6LBA7	A0A1D6LBA7_MAIZE	unreviewed		Zea mays (Maize)	Zm00001eb063870			Nicotinate phosphoribosyltransferase (EC 6.3.4.21)
A0A317YLJ0	A0A317YLJ0_MAIZE	unreviewed	NAPRT1	Zea mays (Maize)	Zm00001eb063870	NAPRT1		Nicotinate phosphoribosyltransferase (EC 6.3.4.21)
B4FZV8	B4FZV8_MAIZE	unreviewed	100274271	Zea mays (Maize)	Zm00001eb063870	100274271		Nicotinate phosphoribosyltransferase (EC 6.3.4.21)
C0PHJ7	C0PHJ7_MAIZE	unreviewed	100274271	Zea mays (Maize)	Zm00001eb063870	100274271		Nicotinate phosphoribosyltransferase (EC 6.3.4.21)
C4JC72	C4JC72_MAIZE	unreviewed		Zea mays (Maize)	Zm00001eb063870			Uncharacterized protein
A0A317YJH4	A0A317YJH4_MAIZE	unreviewed		Zea mays (Maize)	Zm00001eb063880			Uncharacterized protein
B6T919	B6T919_MAIZE	unreviewed	100276339	Zea mays (Maize)	Zm00001eb063880	100276339		Transmembrane and coiled-coil domain-containing protein 5B
A0A1D6LBB0	A0A1D6LBB0_MAIZE	unreviewed		Zea mays (Maize)	Zm00001eb063890			Uncharacterized protein
A0A1D6LBB1	A0A1D6LBB1_MAIZE	unreviewed		Zea mays (Maize)	Zm00001eb063890			Uncharacterized protein
A0A317YM00	A0A317YM00_MAIZE	unreviewed		Zea mays (Maize)	Zm00001eb063890			Uncharacterized protein
A0A1D6LBB2	A0A1D6LBB2_MAIZE	unreviewed	103644303	Zea mays (Maize)	Zm00001eb063900	103644303		Receptor-like serine/threonine-protein kinase (EC 2.7.11.1)
A0A317Y7G4	A0A317Y7G4_MAIZE	unreviewed	At1g34300_0	Zea mays (Maize)	Zm00001eb063900	At1g34300_0		Receptor-like serine/threonine-protein kinase (EC 2.7.11.1)
C0P4G7	C0P4G7_MAIZE	unreviewed		Zea mays (Maize)	Zm00001eb063920			Uncharacterized protein
C0PLV3	C0PLV3_MAIZE	unreviewed		Zea mays (Maize)	Zm00001eb063920			Uncharacterized protein
B6TQK8	B6TQK8_MAIZE	unreviewed	100277187	Zea mays (Maize)	Zm00001eb070430	100277187		Uncharacterized protein
A0A317YFR1	A0A317YFR1_MAIZE	unreviewed		Zea mays (Maize)	Zm00001eb070440			Uncharacterized protein
A0A3L6D7I6	A0A3L6D7I6_MAIZE	unreviewed		Zea mays (Maize)	Zm00001eb070440			Uncharacterized protein
A0A3L6E4N0	A0A3L6E4N0_MAIZE	unreviewed		Zea mays (Maize)	Zm00001eb070440			Uncharacterized protein
A0A3L6ETS2	A0A3L6ETS2_MAIZE	unreviewed		Zea mays (Maize)	Zm00001eb070440			Uncharacterized protein
A0A3L6FJY6	A0A3L6FJY6_MAIZE	unreviewed		Zea mays (Maize)	Zm00001eb070440			Uncharacterized protein
A0A1D6DZ77	A0A1D6DZ77_MAIZE	unreviewed		Zea mays (Maize)	Zm00001eb070450			Putative receptor-like protein kinase
A0A1D6QAZ4	A0A1D6QAZ4_MAIZE	unreviewed		Zea mays (Maize)	Zm00001eb070450			Receptor-like serine/threonine-protein kinase ALE2
A0A3L6FSD5	A0A3L6FSD5_MAIZE	unreviewed	At1g30570_1	Zea mays (Maize)	Zm00001eb070450	At1g30570_1		Putative receptor-like protein kinase
A0A1D6DZ78	A0A1D6DZ78_MAIZE	unreviewed		Zea mays (Maize)	Zm00001eb070460			Protein kinase superfamily protein
A0A1D6DZ79	A0A1D6DZ79_MAIZE	unreviewed	100273687	Zea mays (Maize)	Zm00001eb070460	100273687		Protein kinase superfamily protein
A0A3L6FXA8	A0A3L6FXA8_MAIZE	unreviewed		Zea mays (Maize)	Zm00001eb070460			Protein kinase domain-containing protein
A0A3L6FXC6	A0A3L6FXC6_MAIZE	unreviewed		Zea mays (Maize)	Zm00001eb070460			Putative LRR receptor-like serine/threonine-protein kinase
B6U5V2	B6U5V2_MAIZE	unreviewed		Zea mays (Maize)	Zm00001eb070460			Serine/threonine-protein kinase receptor
A0A1D6DZ84	A0A1D6DZ84_MAIZE	unreviewed		Zea mays (Maize)	Zm00001eb070480			F-box/kelch-repeat protein
A0A1D6F755	A0A1D6F755_MAIZE	unreviewed		Zea mays (Maize)	Zm00001eb070480			F-box/kelch-repeat protein
A0A1D6I0M2	A0A1D6I0M2_MAIZE	unreviewed		Zea mays (Maize)	Zm00001eb070480			F-box/kelch-repeat protein
A0A3L6FY97	A0A3L6FY97_MAIZE	unreviewed	At5g60570_0	Zea mays (Maize)	Zm00001eb070480	At5g60570_0		F-box/kelch-repeat protein
B4F9L7	B4F9L7_MAIZE	unreviewed	100274214	Zea mays (Maize)	Zm00001eb070480	100274214		F-box/kelch-repeat protein
B4F9N2	B4F9N2_MAIZE	unreviewed	100274214	Zea mays (Maize)	Zm00001eb070480	100274214		F-box/kelch-repeat protein
A0A1D6DZD0	A0A1D6DZD0_MAIZE	unreviewed		Zea mays (Maize)	Zm00001eb070700			Uncharacterized protein
A0A1D6DZD4	A0A1D6DZD4_MAIZE	unreviewed		Zea mays (Maize)	Zm00001eb070720			Leucine-rich repeat transmembrane protein kinase
A0A1D6DZD5	A0A1D6DZD5_MAIZE	unreviewed		Zea mays (Maize)	Zm00001eb070720			Leucine-rich repeat transmembrane protein kinase
A0A3L6FVF0	A0A3L6FVF0_MAIZE	unreviewed	At1g56130_6	Zea mays (Maize)	Zm00001eb070720	At1g56130_6		Putative LRR receptor-like serine/threonine-protein kinase
C4IZS8	C4IZS8_MAIZE	unreviewed		Zea mays (Maize)	Zm00001eb070720			Leucine-rich repeat transmembrane protein kinase
K7ULV8	K7ULV8_MAIZE	unreviewed		Zea mays (Maize)	Zm00001eb070720			Putative leucine-rich repeat receptor-like protein kinase family protein
A0A1D6DZE5	A0A1D6DZE5_MAIZE	unreviewed	103645941	Zea mays (Maize)	Zm00001eb070740	103645941		Tetratricopeptide repeat (TPR)-like superfamily protein
A0A3L6G0C4	A0A3L6G0C4_MAIZE	unreviewed	FKBP62_2	Zea mays (Maize)	Zm00001eb070740	FKBP62_2		Peptidyl-prolyl cis-trans isomerase FKBP62
A0A1D6DZE9	A0A1D6DZE9_MAIZE	unreviewed		Zea mays (Maize)	Zm00001eb070750			OSJNBa0008M17.14-like protein
A0A1D6DZF0	A0A1D6DZF0_MAIZE	unreviewed		Zea mays (Maize)	Zm00001eb070750			OSJNBa0008M17.14-like protein
A0A3L6FVC0	A0A3L6FVC0_MAIZE	unreviewed	At4g15545_0	Zea mays (Maize)	Zm00001eb070750	At4g15545_0		Uncharacterized protein
B6TTT3	B6TTT3_MAIZE	unreviewed	100277416	Zea mays (Maize)	Zm00001eb070750	100277416		OSJNBa0008M17.14-like protein
B6TU61	B6TU61_MAIZE	unreviewed		Zea mays (Maize)	Zm00001eb070750			Uncharacterized protein
A0A1D6DZF2	A0A1D6DZF2_MAIZE	unreviewed		Zea mays (Maize)	Zm00001eb070760			Argonaute2a
A0A3L6G5V5	A0A3L6G5V5_MAIZE	unreviewed	AGO2_0	Zea mays (Maize)	Zm00001eb070760	AGO2_0		Protein argonaute 2
C0PIX4	C0PIX4_MAIZE	unreviewed		Zea mays (Maize)	Zm00001eb070760			Piwi domain-containing protein
A0A1D6DZG5	A0A1D6DZG5_MAIZE	unreviewed		Zea mays (Maize)	Zm00001eb070770			Accumulation of photosystem one1
A0A1D6DZG6	A0A1D6DZG6_MAIZE	unreviewed		Zea mays (Maize)	Zm00001eb070770			Accumulation of photosystem one1
A0A1D6DZG8	A0A1D6DZG8_MAIZE	unreviewed		Zea mays (Maize)	Zm00001eb070770			Accumulation of photosystem one1
A0A3L6G2B9	A0A3L6G2B9_MAIZE	unreviewed	APO1	Zea mays (Maize)	Zm00001eb070770	APO1		APO protein 1, chloroplastic
C0PCJ6	C0PCJ6_MAIZE	unreviewed	100383040	Zea mays (Maize)	Zm00001eb070770	100383040		Accumulation of photosystem one1
B4FH66	B4FH66_MAIZE	unreviewed	100282375	Zea mays (Maize)	Zm00001eb070780	100282375		Adhesive/proline-rich protein
A0A1D6DZH1	A0A1D6DZH1_MAIZE	unreviewed		Zea mays (Maize)	Zm00001eb070790			Lecithin-cholesterol acyltransferase-like 4
A0A1D6HK38	A0A1D6HK38_MAIZE	unreviewed	100384087	Zea mays (Maize)	Zm00001eb070790	100384087		Lecithin-cholesterol acyltransferase-like 4
A0A3L6G128	A0A3L6G128_MAIZE	unreviewed	LCAT4	Zea mays (Maize)	Zm00001eb070790	LCAT4		Lecithin-cholesterol acyltransferase-like 4
C0PLE5	C0PLE5_MAIZE	unreviewed		Zea mays (Maize)	Zm00001eb070790			Uncharacterized protein
C4IZK0	C4IZK0_MAIZE	unreviewed	100384087	Zea mays (Maize)	Zm00001eb070790	100384087		Uncharacterized protein
A0A1D6HK39	A0A1D6HK39_MAIZE	unreviewed		Zea mays (Maize)	Zm00001eb070800			YchF-GTPase_C domain-containing protein
A0A3L6DY08	A0A3L6DY08_MAIZE	unreviewed	ychF_0	Zea mays (Maize)	Zm00001eb070800	ychF_0		Ribosome-binding ATPase YchF
B4FHC0	B4FHC0_MAIZE	unreviewed	100194070	Zea mays (Maize)	Zm00001eb070800	100194070		Uncharacterized protein
A0A1D6ED41	A0A1D6ED41_MAIZE	unreviewed		Zea mays (Maize)	Zm00001eb086010			Acyl-CoA N-acyltransferase (NAT) superfamily protein
A0A1D6EDJ9	A0A1D6EDJ9_MAIZE	unreviewed		Zea mays (Maize)	Zm00001eb086540			Lactoylglutathione lyase (EC 4.4.1.5) (Glyoxalase I)
A0A3L6FTL8	A0A3L6FTL8_MAIZE	unreviewed	LGUL	Zea mays (Maize)	Zm00001eb086540	LGUL		Lactoylglutathione lyase (EC 4.4.1.5) (Glyoxalase I)
B6SGV9	B6SGV9_MAIZE	unreviewed	100280481	Zea mays (Maize)	Zm00001eb086540	100280481		Lactoylglutathione lyase (EC 4.4.1.5) (Glyoxalase I)
B6T8D8	B6T8D8_MAIZE	unreviewed		Zea mays (Maize)	Zm00001eb086540			Lactoylglutathione lyase (EC 4.4.1.5) (Glyoxalase I)
B8A2N7	B8A2N7_MAIZE	unreviewed		Zea mays (Maize)	Zm00001eb086540			Glyoxalase domain-containing protein
C0PMQ1	C0PMQ1_MAIZE	unreviewed	100280481	Zea mays (Maize)	Zm00001eb086540	100280481		Lactoylglutathione lyase (EC 4.4.1.5) (Glyoxalase I)
A0A1D6EI15	A0A1D6EI15_MAIZE	unreviewed		Zea mays (Maize)	Zm00001eb092520			Putative microtubule-binding protein TANGLED
C0PCZ5	C0PCZ5_MAIZE	unreviewed		Zea mays (Maize)	Zm00001eb094640			Uncharacterized protein
A0A3L6DJJ0	A0A3L6DJJ0_MAIZE	unreviewed		Zea mays (Maize)	Zm00001eb095180			Uncharacterized protein
A0A3L6EPU1	A0A3L6EPU1_MAIZE	unreviewed		Zea mays (Maize)	Zm00001eb095180			Uncharacterized protein
A0A1D6QEM5	A0A1D6QEM5_MAIZE	unreviewed		Zea mays (Maize)	Zm00001eb097870			Fumarylacetoacetate (FAA) hydrolase family
A0A1D6ENV3	A0A1D6ENV3_MAIZE	unreviewed		Zea mays (Maize)	Zm00001eb097880			TPX2 (Targeting protein for Xklp2) protein family
A0A1D6ENV4	A0A1D6ENV4_MAIZE	unreviewed		Zea mays (Maize)	Zm00001eb097880			TPX2 (Targeting protein for Xklp2) protein family
A0A3L6FQ16	A0A3L6FQ16_MAIZE	unreviewed		Zea mays (Maize)	Zm00001eb097880			Uncharacterized protein
B6TPY4	B6TPY4_MAIZE	unreviewed		Zea mays (Maize)	Zm00001eb097880			TPX2 domain-containing protein
A0A3L6G0M0	A0A3L6G0M0_MAIZE	unreviewed	VIP1_4	Zea mays (Maize)	Zm00001eb103000	VIP1_4		Transcription factor VIP1
C4JAX3	C4JAX3_MAIZE	unreviewed	100502386	Zea mays (Maize)	Zm00001eb103000	100502386	bZIP46	BZIP transcription factor (Basic-leucine zipper (BZIP) transcription factor family protein)
A0A1D6ET93	A0A1D6ET93_MAIZE	unreviewed		Zea mays (Maize)	Zm00001eb103010			Uncharacterized protein
A0A3L6G2X0	A0A3L6G2X0_MAIZE	unreviewed		Zea mays (Maize)	Zm00001eb103010			Uncharacterized protein
B6SQK1	B6SQK1_MAIZE	unreviewed		Zea mays (Maize)	Zm00001eb103010			Uncharacterized protein
B6U3A4	B6U3A4_MAIZE	unreviewed		Zea mays (Maize)	Zm00001eb103010			Uncharacterized protein
A0A096ST30	A0A096ST30_MAIZE	unreviewed	103647597	Zea mays (Maize)	Zm00001eb103020	103647597		Ycf49-like protein
A0A3L6G233	A0A3L6G233_MAIZE	unreviewed		Zea mays (Maize)	Zm00001eb103020			Ycf49-like protein
A0A1D6ET96	A0A1D6ET96_MAIZE	unreviewed	100193061	Zea mays (Maize)	Zm00001eb103030	100193061		RNA helicase (EC 3.6.4.13)
A0A1D6ET98	A0A1D6ET98_MAIZE	unreviewed		Zea mays (Maize)	Zm00001eb103030			DEAD-box ATP-dependent RNA helicase 7
A0A1D6I8W9	A0A1D6I8W9_MAIZE	unreviewed		Zea mays (Maize)	Zm00001eb103030			DEAD-box ATP-dependent RNA helicase 7
A0A3L6FWG5	A0A3L6FWG5_MAIZE	unreviewed		Zea mays (Maize)	Zm00001eb103030			RNA helicase (EC 3.6.4.13)
A0A1D6EVT3	A0A1D6EVT3_MAIZE	unreviewed		Zea mays (Maize)	Zm00001eb105110			Homogentisate phytyltransferase 1 chloroplastic
A0A1D6EVT4	A0A1D6EVT4_MAIZE	unreviewed		Zea mays (Maize)	Zm00001eb105110			Homogentisate phytyltransferase 1 chloroplastic
A0A1D6EVT5	A0A1D6EVT5_MAIZE	unreviewed		Zea mays (Maize)	Zm00001eb105110			Homogentisate phytyltransferase 1 chloroplastic
A0A1D6EVT6	A0A1D6EVT6_MAIZE	unreviewed		Zea mays (Maize)	Zm00001eb105110			Homogentisate phytyltransferase 1 chloroplastic
A0A1D6P0B1	A0A1D6P0B1_MAIZE	unreviewed		Zea mays (Maize)	Zm00001eb105110			Small RNA degrading nuclease 3
A0A1D6P0B3	A0A1D6P0B3_MAIZE	unreviewed		Zea mays (Maize)	Zm00001eb105110			Small RNA degrading nuclease 3
A0A3L6G545	A0A3L6G545_MAIZE	unreviewed	HGGT_3	Zea mays (Maize)	Zm00001eb105110	HGGT_3		Homogentisate geranylgeranyltransferase
B4FBU3	B4FBU3_MAIZE	unreviewed		Zea mays (Maize)	Zm00001eb105110			Uncharacterized protein
B4FZX7	B4FZX7_MAIZE	unreviewed		Zea mays (Maize)	Zm00001eb105120			Ribosomal protein L15
B6SJU8	B6SJU8_MAIZE	unreviewed	100281990	Zea mays (Maize)	Zm00001eb105120	100281990		Ribosomal protein L15
B6T267	B6T267_MAIZE	unreviewed		Zea mays (Maize)	Zm00001eb105120			Ribosomal protein L15
A0A1D6EWS4	A0A1D6EWS4_MAIZE	unreviewed	103647705	Zea mays (Maize)	Zm00001eb105800	103647705		Adenosine 5'-phosphosulfate reductase-like2
A0A1D6EWT3	A0A1D6EWT3_MAIZE	unreviewed		Zea mays (Maize)	Zm00001eb105820			Receptor-like serine/threonine-protein kinase (EC 2.7.11.1)
A0A3L6FT74	A0A3L6FT74_MAIZE	unreviewed	At2g19130_14	Zea mays (Maize)	Zm00001eb105820	At2g19130_14		Receptor-like serine/threonine-protein kinase (EC 2.7.11.1)
